# Supplementary material for: Genomic Surveillance of SARS-CoV-2 in the Southern Province of Zambia: Detection and Characterization of Alpha, Beta, Delta, and Omicron Variants of Concern
Source: MDPI journal article supplement (doi:10.3390/v14091865), 2022-08-24
Supplement: s1 [file s1]

### Supplementary Materials

**Table S1:** Characteristics of 40 SARS-CoV-2 whole-genomes from the Southern Province of Zambia

| Patient ID. | Sex     | Age | C <sub>T</sub> Value | Virus name (GISAID Accession ID)                  | Collection Date  | District    | Lineage | Covid-19 Wave |
|-------------|---------|-----|----------------------|---------------------------------------------------|------------------|-------------|---------|---------------|
| 1           | Female  | 17  | 20.3                 | hCoV-19/Zambia/SP113/2021 EPI_ISL_6768069         | 2 February 2021  | Choma       | B.1.351 | Second        |
| 2           | Male    | 19  | 18                   | hCoV-19/Zambia/SP87/2021 EPI_ISL_6764745          | 15 February 2021 | Namwala     | B.1.351 | Second        |
| 3           | Male    | 38  | 18.4                 | hCoV-19/Zambia/SP10/2021 EPI_ISL_6760707          | 28 January 2021  | Mazabuka    | B.1.351 | Second        |
| 4           | Male    | 16  | 22.3                 | hCoV-19/Zambia/SP11/2021 EPI_ISL_6760905          | 3 February 2021  | Kalomo      | B.1.351 | Second        |
| 5           | Male    | 34  | 16.7                 | hCoV-19/Zambia/SP30/2021 EPI_ISL_6760973          | 5 February 2021  | Namwala     | B.1.351 | Second        |
| 6           | Female  | 17  | 16.8                 | hCoV-19/Zambia/SP128/2021 EPI_ISL_6760998         | 18 February 2021 | Choma       | B.1.351 | Second        |
| 7           | Male    | 23  | 18.2                 | hCoV-19/Zambia/SP32/2021 EPI_ISL_6761015          | 15 February 2021 | Namwala     | B.1.1.7 | Second        |
| 8           | Male    | 57  | 19.2                 | hCoV-19/Zambia/SP37/2020 EPI_ISL_6761027          | 1 December 2020  | Pemba       | B.1.1.7 | Second        |
| 9           | Female  | 44  | 26.4                 | hCoV-19/Zambia/SP172/2021 EPI_ISL_6761052         | 2 September 2021 | Chikankata  | B.1.1.7 | Third         |
| 10          | Female  | 23  | 20.1                 | hCoV-19/Zambia/SP250/2021 EPI_ISL_6761088         | 26 June 2021     | Choma       | AY.116  | Third         |
| 11          | Female  | 5   | 28.7                 | hCoV-19/Zambia/SP252/2021 EPI_ISL_6761100         | 19 August 2021   | Choma       | AY.116  | Third         |
| 12          | Male    | -   | 19.5                 | hCoV-19/Zambia/SP253/2021 EPI_ISL_6762977         | 17 June 2021     | Choma       | AY.116  | Third         |
| 13          | Male    | 44  | 29.2                 | hCoV-19/Zambia/SP251/2021 EPI_ISL_6761106         | 8 September 2021 | Choma       | AY.116  | Third         |
| 14          | Unknown | 0   | 14.3                 | hCoV-19/Zambia/CHAZ-CHS1777/2022 EPI_ISL_12363645 | Unknown          | Chikankata  | BA.1    | Fourth        |
| 15          | Male    | 20  | 20.5                 | hCoV-19/Zambia/CHAZ-CHS1778/2022 EPI_ISL_12363646 | 28 February 2022 | Livingstone | BA.2    | Fourth        |
| 16          | Male    | 0   | 23                   | hCoV-19/Zambia/CHAZ-CHS1780/2022 EPI_ISL_12363647 | Unknown          | Chikankata  | BA.1    | Fourth        |
| 17          | Male    | 46  | 24.4                 | hCoV-19/Zambia/CHAZ-CHS1781/2021 EPI_ISL_12363648 | 21 December 2021 | Livingstone | BA.1    | Fourth        |
| 18          | Female  | 33  | 26.3                 | hCoV-19/Zambia/CHAZ-CHS1782/2022 EPI_ISL_12363649 | 6 April 2022     | Choma       | BA.2    | Fourth        |
| 19          | Male    | 32  | 17.9                 | hCoV-19/Zambia/CHAZ-CHS1787/2022 EPI_ISL_12363652 | 5 January 2022   | Chikankata  | BA.1    | Fourth        |
| 20          | Female  | 0   | 28.9                 | hCoV-19/Zambia/CHAZ-CHS1788/2022 EPI_ISL_12363653 | Unknown          | Chikankata  | BA.1    | Fourth        |

|    |        |    |      |                                                   |                  |             |         |        |
|----|--------|----|------|---------------------------------------------------|------------------|-------------|---------|--------|
| 21 | Male   | 17 | 15   | hCoV-19/Zambia/CHAZ-CHS1789/2021 EPI_ISL_12363654 | 12 December 2021 | Livingstone | BA.1    | Fourth |
| 22 | Female | 30 | 28.9 | hCoV-19/Zambia/CHAZ-CHS1794/2021 EPI_ISL_12363658 | 14 December 2021 | Kazungula   | BA.2    | Fourth |
| 23 | Female | 52 | 17.4 | hCoV-19/Zambia/CHAZ-CHS1796/2021 EPI_ISL_12363660 | 7 December 2021  | Livingstone | BA.1    | Fourth |
| 24 | Female | 23 | 22   | hCoV-19/Zambia/CHAZ-CHS1798/2021 EPI_ISL_12363661 | 30 December 2021 | Chikankata  | BA.1.1  | Fourth |
| 25 | Male   | 48 | 11   | hCoV-19/Zambia/CHAZ-CHS1799/2021 EPI_ISL_12363662 | 28 December 2021 | Chikankata  | BA.1    | Fourth |
| 26 | Female | 23 | 28.8 | hCoV-19/Zambia/CHAZ-CHS1801/2021 EPI_ISL_12363663 | 13 December 2021 | Livingstone | BA.1.14 | Fourth |
| 27 | Male   | 0  | 28.8 | hCoV-19/Zambia/CHAZ-CHS1802/2021 EPI_ISL_12363664 | 13 December 2021 | Livingstone | BA.1    | Fourth |
| 28 | Male   | -  | 20.5 | hCoV-19/Zambia/CHAZ-CHS1807/2021 EPI_ISL_12363667 | 14 December 2021 | Kazungula   | BA.1    | Fourth |
| 29 | Male   | 40 | 17.9 | hCoV-19/Zambia/CHAZ-CHS1809/2022 EPI_ISL_12363668 | 20 January 2022  | Livingstone | BA.1    | Fourth |
| 30 | Male   | 19 | 25.4 | hCoV-19/Zambia/CHAZ-CHS1813/2022 EPI_ISL_12363669 | 28 February 2022 | Livingstone | BA.2    | Fourth |
| 31 | Male   | 49 | 17.3 | hCoV-19/Zambia/CHAZ-CHS1815/2022 EPI_ISL_12363670 | 5 January 2022   | Chikankata  | BA.1.1  | Fourth |
| 32 | Female | 0  | 24   | hCoV-19/Zambia/CHAZ-CHS1816/2022 EPI_ISL_12363671 | Unknown          | Chikankata  | BA.1    | Fourth |
| 33 | Male   | 45 | 23.7 | hCoV-19/Zambia/CHAZ-CHS1817/2021 EPI_ISL_12363672 | 14 December 2021 | Kazungula   | BA.1.1  | Fourth |
| 34 | Male   | 39 | 15.2 | hCoV-19/Zambia/CHAZ-CHS1818/2021 EPI_ISL_12363673 | 14 December 2021 | Livingstone | BA.1    | Fourth |
| 35 | Male   | 39 | 28.6 | hCoV-19/Zambia/CHAZ-CHS1819/2021 EPI_ISL_12363674 | 14 December 2021 | Kazungula   | BA.1.1  | Fourth |
| 36 | Male   | 25 | -    | hCoV-19/Zambia/CHAZ-CHS1838/2022 EPI_ISL_12363681 | Unknown          | Namwala     | BA.1    | Fourth |

|    |        |    |   |                                                    |                  |             |      |        |
|----|--------|----|---|----------------------------------------------------|------------------|-------------|------|--------|
| 37 | Male   | 48 | - | hCoV-19/Zambia/CHAZ-CHS1908/2021 EPI_ISL_13053875  | 28 December 2021 | Choma       | BA.1 | Fourth |
| 38 | Female | -  | - | >hCoV-19/Zambia/CHAZ-CHS1909/2022 EPI_ISL_13053241 | Unknown          | Chikankata  | BA.1 | Fourth |
| 39 | Male   | 19 | - | >hCoV-19/Zambia/CHAZ-CHS1979/2022 EPI_ISL_13053876 | 28 February 2022 | Livingstone | BA.2 | Fourth |
| 40 | Male   | 46 | - | hCoV-19/Zambia/CHAZ-CHS1980/2021 EPI_ISL_13053244  | 21 December 2021 | Livingstone | BA.1 | Fourth |

**Table S2:** Nucleic acid and amino acid mutations observed in the 36 SARS-CoV-2 genomes obtained from the Southern Province of Zambia

| No. | Position | Genome Region | Number of Mutations | Reference Nucleotide | Sample Nucleotide | AA Change | Frequency | Mutation Type |
|-----|----------|---------------|---------------------|----------------------|-------------------|-----------|-----------|---------------|
| 1   | 174      | <b>5'UTR</b>  | 4                   | G                    | T                 | 174       | 6         | extragenic    |
| 2   | 210      |               |                     | G                    | T                 | 210       | 4         | extragenic    |
| 3   | 222      |               |                     | C                    | T                 | 222       | 1         | extragenic    |
| 4   | 241      |               |                     | C                    | T                 | 241       | 31        | extragenic    |
| 5   | 343      | <b>NSP1</b>   | 3                   | .                    | C                 | V26       | 2         | Insertion     |
| 6   | 478      |               |                     | C                    | T                 | I71I      | 1         | Synonymous    |
| 7   | 670      |               |                     | T                    | G                 | S135R     | 5         | Missense      |
| 8   | 913      | <b>NSP2</b>   | 5                   | C                    | T                 | S36S      | 3         | Synonymous    |
| 9   | 926      |               |                     | T                    | C                 | F41L      | 2         | Missense      |
| 10  | 940      |               |                     | G                    | A                 | K45K      | 1         | Synonymous    |
| 11  | 1059     |               |                     | C                    | T                 | T85I      | 6         | Missense      |
| 12  | 2692     |               |                     | A                    | T                 | T629T     | 2         | Synonymous    |
| 13  | 2790     | <b>NSP3</b>   | 42                  | C                    | T                 | T24I      | 5         | Missense      |
| 14  | 2832     |               |                     | A                    | G                 | K38R      | 20        | Missense      |
| 15  | 2903     |               |                     | A                    | G                 | I62V      | 1         | Missense      |
| 16  | 3037     |               |                     | C                    | T                 | F106F     | 39        | Synonymous    |
| 17  | 3177     |               |                     | C                    | T                 | P153L     | 3         | Missense      |
| 18  | 3267     |               |                     | C                    | T                 | T183I     | 3         | Missense      |

|    |      |     |   |        |    |                 |
|----|------|-----|---|--------|----|-----------------|
| 19 | 4150 | T   | C | V477V  | 2  | Synonymous      |
| 20 | 4181 | G   | T | A488S  | 4  | <b>Missense</b> |
| 21 | 4184 | G   | A | G489S  | 5  | <b>Missense</b> |
| 22 | 4255 | G   | T | P512P  | 2  | Synonymous      |
| 23 | 4276 | C   | T | Y519Y  | 2  | Synonymous      |
| 24 | 4321 | C   | T | A534A  | 5  | Synonymous      |
| 25 | 4540 | C   | T | Y607Y  | 2  | Synonymous      |
| 26 | 4576 | A   | T | T619T  | 2  | Synonymous      |
| 27 | 4579 | T   | A | L620L  | 3  | Synonymous      |
| 28 | 4655 | C   | T | R646W  | 1  | <b>Missense</b> |
| 29 | 5161 | T   | A | F814L  | 1  | <b>Missense</b> |
| 30 | 5230 | G   | T | K837N  | 6  | <b>Missense</b> |
| 31 | 5260 | T   | A | T847T  | 1  | Synonymous      |
| 32 | 5386 | T   | G | A889A  | 22 | Synonymous      |
| 33 | 5388 | C   | A | A890D  | 3  | <b>Missense</b> |
| 34 | 5866 | C   | T | F1049F | 1  | Synonymous      |
| 35 | 5953 | G   | A | L1078L | 2  | Synonymous      |
| 36 | 5986 | C   | T | F1089F | 3  | Synonymous      |
| 37 | 6106 | T   | C | Y1129Y | 1  | Synonymous      |
| 38 | 6402 | C   | T | P1228L | 4  | <b>Missense</b> |
| 39 | 6513 | GTT | . | S1265  | 21 | Deletion        |
| 40 | 6568 | C   | T | D1283D | 1  | Synonymous      |
| 41 | 6954 | T   | C | I1412T | 3  | <b>Missense</b> |
| 42 | 6968 | C   | T | L1416L | 1  | Synonymous      |
| 43 | 7069 | A   | G | E1450E | 1  | Synonymous      |
| 44 | 7071 | G   | T | G1451V | 1  | <b>Missense</b> |
| 45 | 7086 | C   | T | T1456I | 2  | <b>Missense</b> |
| 46 | 7124 | C   | T | P1469S | 4  | <b>Missense</b> |
| 47 | 7252 | G   | C | L1511F | 1  | <b>Missense</b> |
| 48 | 7292 | T   | C | G1524G | 1  | Synonymous      |

|    |       |      |   |           |   |        |    |            |
|----|-------|------|---|-----------|---|--------|----|------------|
| 49 | 7787  |      |   | G         | C | A1690P | 1  | Missense   |
| 50 | 7923  |      |   | C         | T | S1735F | 1  | Missense   |
| 51 | 8035  |      |   | G         | T | M1772I | 2  | Missense   |
| 52 | 8290  |      |   | C         | T | L1857L | 1  | Synonymous |
| 53 | 8393  |      |   | G         | A | A1892T | 22 | Missense   |
| 54 | 8499  |      |   | C         | T | A1927V | 2  | Missense   |
| 55 | 8723  | NSP4 | 9 | A         | C | I57L   | 1  | Missense   |
| 56 | 8986  |      |   | C         | T | D144D  | 4  | Synonymous |
| 57 | 9053  |      |   | G         | T | V167L  | 4  | Missense   |
| 58 | 9344  |      |   | C         | T | L264F  | 5  | Missense   |
| 59 | 9424  |      |   | A         | G | V290V  | 3  | Synonymous |
| 60 | 9474  |      |   | C         | T | A307V  | 1  | Missense   |
| 61 | 9534  |      |   | C         | T | T327I  | 5  | Missense   |
| 62 | 9866  |      |   | C         | T | L438F  | 5  | Missense   |
| 63 | 10029 |      |   | C         | T | T492I  | 31 | Missense   |
| 64 | 10181 | NSP5 | 7 | A         | G | I43V   | 1  | Missense   |
| 65 | 10198 |      |   | C         | T | D48D   | 2  | Synonymous |
| 66 | 10323 |      |   | A         | G | K90R   | 6  | Missense   |
| 67 | 10447 |      |   | G         | A | R131R  | 5  | Synonymous |
| 68 | 10449 |      |   | C         | A | P132H  | 27 | Missense   |
| 69 | 10691 |      |   | A         | G | I213V  | 4  | Missense   |
| 70 | 10892 |      |   | A         | G | T280A  | 1  | Missense   |
| 71 | 11083 | NSP6 | 9 | G         | T | L37F   | 1  | Missense   |
| 72 | 11109 |      |   | C         | T | A46V   | 1  | Missense   |
| 73 | 11201 |      |   | A         | G | T77A   | 4  | Missense   |
| 74 | 11286 |      |   | TGTCTGGTT | . | L105   | 22 | Deletion   |
| 75 | 11288 |      |   | TCTGGTTTT | . | S106   | 14 | Deletion   |
| 76 | 11332 |      |   | A         | G | V120V  | 4  | Synonymous |
| 77 | 11537 |      |   | A         | G | I189V  | 20 | Missense   |

|     |       |               |    |   |   |              |    |                 |
|-----|-------|---------------|----|---|---|--------------|----|-----------------|
| 78  | 11653 |               |    | C | T | L227L        | 2  | Synonymous      |
| 79  | 11713 |               |    | T | C | S247S        | 1  | Synonymous      |
| 80  | 11941 | <b>NSP7</b>   | 1  | C | T | V33V         | 1  | Synonymous      |
| 81  | 12406 | <b>NSP8</b>   | 4  | C | T | N105N        | 1  | Synonymous      |
| 82  | 12452 |               |    | C | T | <b>P121S</b> | 2  | <b>Missense</b> |
| 83  | 12473 |               |    | C | T | K127K        | 1  | Synonymous      |
| 84  | 12557 |               |    | A | C | <b>I156L</b> | 2  | <b>Missense</b> |
| 85  | 12786 | <b>NSP9</b>   | 2  | C | T | <b>T34I</b>  | 1  | <b>Missense</b> |
| 86  | 12880 |               |    | C | T | I65I         | 5  | Synonymous      |
| 87  | 13195 | <b>NSP10</b>  | 2  | T | C | V57V         | 22 | Synonymous      |
| 88  | 13339 |               |    | T | A | <b>N105K</b> | 2  | <b>Missense</b> |
| 89  | 13592 | <b>NSP12b</b> | 11 | C | T | <b>T42I</b>  | 2  | <b>Missense</b> |
| 90  | 13756 |               |    | A | G | <b>I97V</b>  | 1  | <b>Missense</b> |
| 91  | 14408 |               |    | C | T | <b>P314L</b> | 40 | <b>Missense</b> |
| 92  | 14676 |               |    | C | T | P403P        | 3  | Synonymous      |
| 93  | 15240 |               |    | C | T | N591N        | 22 | Synonymous      |
| 94  | 15279 |               |    | C | T | H604H        | 3  | Synonymous      |
| 95  | 15451 |               |    | G | A | <b>G662S</b> | 4  | <b>Missense</b> |
| 96  | 15714 |               |    | C | T | L749L        | 5  | Synonymous      |
| 97  | 15939 |               |    | T | C | D824D        | 1  | Synonymous      |
| 98  | 15960 |               |    | C | T | A831A        | 1  | Synonymous      |
| 99  | 16176 |               |    | T | C | T903T        | 3  | Synonymous      |
| 100 | 16406 | <b>NSP13</b>  | 6  | T | G | <b>V57G</b>  | 2  | <b>Missense</b> |
| 101 | 16466 |               |    | C | T | <b>P77L</b>  | 4  | <b>Missense</b> |
| 102 | 16636 |               |    | G | T | <b>A134S</b> | 1  | <b>Missense</b> |
| 103 | 17280 |               |    | G | T | V348V        | 1  | Synonymous      |
| 104 | 17410 |               |    | C | T | <b>R392C</b> | 5  | <b>Missense</b> |
| 105 | 17999 |               |    | C | T | <b>T588I</b> | 4  | <b>Missense</b> |
| 106 | 18163 | <b>NSP14</b>  | 2  | A | G | <b>I42V</b>  | 27 | <b>Missense</b> |

|     |       |       |    |       |      |       |   |            |
|-----|-------|-------|----|-------|------|-------|---|------------|
| 107 | 19220 |       |    | C     | T    | A394V | 4 | Missense   |
| 108 | 19684 | NSP15 | 8  | G     | T    | V22L  | 1 | Missense   |
| 109 | 19803 |       |    | C     | T    | R61R  | 4 | Synonymous |
| 110 | 19884 |       |    | C     | T    | Y88Y  | 1 | Synonymous |
| 111 | 19955 |       |    | C     | T    | T112I | 5 | Missense   |
| 112 | 19999 |       |    | G     | T    | V127F | 1 | Missense   |
| 113 | 20055 |       |    | A     | G    | E145E | 5 | Synonymous |
| 114 | 20094 |       |    | A     | G    | K158K | 2 | Synonymous |
| 115 | 20132 |       |    | C     | T    | A171V | 2 | Missense   |
| 116 | 20741 | NSP16 | 23 | A     | G    | Q28R  | 1 | Missense   |
| 117 | 21082 |       |    | GA    | CT   | E142L | 2 | Missense   |
| 118 | 21110 |       |    | C     | T    | T151I | 4 | Missense   |
| 119 | 21512 |       |    | A     | C    | N285T | 4 | Missense   |
| 120 | 21517 |       |    | AG    | CA   | R287Q | 4 | Missense   |
| 121 | 21520 |       |    | G     | C    | V288L | 4 | Missense   |
| 122 | 21523 |       |    | GTT   | TCG  | V289S | 4 | Missense   |
| 123 | 21528 |       |    | T     | C    | I290I | 4 | Synonymous |
| 124 | 21532 |       |    | A     | T    | S292C | 4 | Missense   |
| 125 | 21534 |       |    | .     | A    | S292  | 2 | Insertion  |
| 126 | 21535 |       |    | G     | .    | S292  | 1 | Deletion   |
| 127 | 21536 |       |    | .     | TC   | D293  | 1 | Insertion  |
| 128 | 21537 |       |    | T     | A    | D293E | 1 | Missense   |
| 129 | 21537 |       |    | T     | .    | D293  | 1 | Deletion   |
| 130 | 21539 |       |    | T     | A    | V294D | 2 | Missense   |
| 131 | 21542 |       |    | T     | .    | L295  | 1 | Deletion   |
| 132 | 21543 |       |    | TGTT  | AACG | V296T | 1 | Missense   |
| 133 | 21543 |       |    | TGTTA | .    | L295  | 1 | Deletion   |
| 134 | 21547 |       |    | AA    | CT   | N297L | 1 | Missense   |
| 135 | 21547 |       |    | AA    | .    | V296  | 1 | Deletion   |

|     |       |       |    |           |     |       |    |            |
|-----|-------|-------|----|-----------|-----|-------|----|------------|
| 136 | 21549 |       |    | C         | G   | N297K | 1  | Missense   |
| 137 | 21550 |       |    | A         | .   | N297  | 1  | Deletion   |
| 138 | 21551 |       |    | A         | T   | N298I | 1  | Missense   |
| 139 | 21614 | Spike | 82 | C         | T   | L18F  | 1  | Missense   |
| 140 | 21618 |       |    | C         | G   | T19R  | 9  | Missense   |
| 141 | 21618 |       |    | C         | T   | T19I  | 5  | Missense   |
| 142 | 21633 |       |    | TACCCCCTG | .   | L24   | 5  | Deletion   |
| 143 | 21762 |       |    | C         | .   | A67   | 22 | Deletion   |
| 144 | 21764 |       |    | A         | .   | A67   | 22 | Deletion   |
| 145 | 21765 |       |    | TACATG    | .   | H69   | 3  | Deletion   |
| 146 | 21767 |       |    | CATG      | .   | I68   | 22 | Deletion   |
| 147 | 21801 |       |    | A         | C   | D80A  | 6  | Missense   |
| 148 | 21846 |       |    | C         | T   | T95I  | 26 | Missense   |
| 149 | 21987 |       |    | G         | A   | G142D | 9  | Missense   |
| 150 | 21987 |       |    | GTGTTTATT | .   | G142  | 22 | Deletion   |
| 151 | 21993 |       |    | ATT       | .   | Y145  | 3  | Deletion   |
| 152 | 22029 |       |    | AGTTCA    | .   | E156  | 4  | Deletion   |
| 153 | 22139 |       |    | G         | C   | V193L | 1  | Missense   |
| 154 | 22161 |       |    | A         | G   | Y200C | 1  | Missense   |
| 155 | 22193 |       |    | .         | T   | I210  | 16 | Insertion  |
| 156 | 22194 |       |    | ATT       | .   | N211  | 2  | Deletion   |
| 157 | 22195 |       |    | T         | G   | N211K | 16 | Missense   |
| 158 | 22197 |       |    | TA        | GC  | L212C | 16 | Missense   |
| 159 | 22200 |       |    | T         | G   | V213G | 5  | Missense   |
| 160 | 22201 |       |    | .         | AGC | S214  | 16 | Insertion  |
| 161 | 22202 |       |    | .         | A   | V213  | 1  | Insertion  |
| 162 | 22203 |       |    | .         | A   | R214  | 1  | Insertion  |
| 163 | 22204 |       |    | T         | A   | R214R | 16 | Synonymous |
| 164 | 22206 |       |    | A         | G   | D215G | 6  | Missense   |



|     |       |           |    |       |    |            |
|-----|-------|-----------|----|-------|----|------------|
| 165 | 22286 | CTTGCTTTA | .  | L242  | 4  | Deletion   |
| 166 | 22289 | G         | T  | A243S | 1  | Missense   |
| 167 | 22293 | T         | C  | L244S | 1  | Missense   |
| 168 | 22481 | A         | C  | T307P | 1  | Missense   |
| 169 | 22511 | AA        | TT | N317F | 1  | Missense   |
| 170 | 22535 | T         | C  | S325P | 1  | Missense   |
| 171 | 22539 | TT        | AA | I326K | 1  | Missense   |
| 172 | 22542 | T         | C  | V327A | 1  | Missense   |
| 173 | 22578 | G         | A  | G339D | 27 | Missense   |
| 174 | 22599 | G         | A  | R346K | 5  | Missense   |
| 175 | 22669 | T         | C  | Y369Y | 1  | Synonymous |
| 176 | 22673 | TC        | CT | S371L | 22 | Missense   |
| 177 | 22674 | C         | T  | S371F | 5  | Missense   |
| 178 | 22679 | T         | C  | S373P | 27 | Missense   |
| 179 | 22686 | C         | T  | S375F | 27 | Missense   |
| 180 | 22688 | A         | G  | T376A | 5  | Missense   |
| 181 | 22775 | G         | A  | D405N | 5  | Missense   |
| 182 | 22786 | A         | C  | R408S | 5  | Missense   |
| 183 | 22813 | G         | T  | K417N | 31 | Missense   |
| 184 | 22882 | T         | G  | N440K | 7  | Missense   |
| 185 | 22898 | G         | A  | G446S | 16 | Missense   |
| 186 | 22917 | T         | G  | L452R | 4  | Missense   |
| 187 | 22969 | AA        | GG | T470A | 1  | Missense   |
| 188 | 22992 | G         | A  | S477N | 21 | Missense   |
| 189 | 22995 | C         | A  | T478K | 24 | Missense   |
| 190 | 23012 | G         | A  | E484K | 6  | Missense   |
| 191 | 23013 | A         | C  | E484A | 20 | Missense   |
| 192 | 23040 | A         | G  | Q493R | 20 | Missense   |
| 193 | 23048 | G         | A  | G496S | 15 | Missense   |
| 194 | 23055 | A         | G  | Q498R | 20 | Missense   |

|     |       |       |   |   |   |        |    |            |
|-----|-------|-------|---|---|---|--------|----|------------|
| 195 | 23063 |       |   | A | T | N501Y  | 29 | Missense   |
| 196 | 23075 |       |   | T | C | Y505H  | 19 | Missense   |
| 197 | 23202 |       |   | C | A | T547K  | 22 | Missense   |
| 198 | 23271 |       |   | C | A | A570D  | 3  | Missense   |
| 199 | 23403 |       |   | A | G | D614G  | 40 | Missense   |
| 200 | 23525 |       |   | C | T | H655Y  | 27 | Missense   |
| 201 | 23599 |       |   | T | G | N679K  | 27 | Missense   |
| 202 | 23604 |       |   | C | G | P681R  | 29 | Missense   |
| 203 | 23604 |       |   | C | A | P681H  | 5  | Missense   |
| 204 | 23664 |       |   | C | T | A701V  | 6  | Missense   |
| 205 | 23709 |       |   | C | T | T716I  | 3  | Missense   |
| 206 | 23854 |       |   | C | A | N764K  | 27 | Missense   |
| 207 | 23948 |       |   | G | T | D796Y  | 27 | Missense   |
| 208 | 24130 |       |   | C | A | N856K  | 22 | Missense   |
| 209 | 24183 |       |   | C | T | T874I  | 1  | Missense   |
| 210 | 24410 |       |   | G | A | D950N  | 4  | Missense   |
| 211 | 24424 |       |   | A | T | Q954H  | 27 | Missense   |
| 212 | 24469 |       |   | T | A | N969K  | 26 | Missense   |
| 213 | 24503 |       |   | C | T | L981F  | 21 | Missense   |
| 214 | 24506 |       |   | T | G | S982A  | 3  | Missense   |
| 215 | 24821 |       |   | G | T | A1087S | 1  | Missense   |
| 216 | 24872 |       |   | G | T | V1104L | 2  | Missense   |
| 217 | 24914 |       |   | G | C | D1118H | 3  | Missense   |
| 218 | 24942 |       |   | A | G | D1127G | 1  | Missense   |
| 219 | 25000 |       |   | C | T | D1146D | 27 | Synonymous |
| 220 | 25352 |       |   | G | T | V1264L | 3  | Missense   |
| 221 | 25469 | ORF3a | 9 | C | T | S26L   | 4  | Missense   |
| 222 | 25546 |       |   | C | T | L52F   | 4  | Missense   |
| 223 | 25563 |       |   | G | T | Q57H   | 6  | Missense   |

|     |       |          |   |     |     |       |    |            |
|-----|-------|----------|---|-----|-----|-------|----|------------|
| 224 | 25584 |          |   | C   | T   | T64T  | 27 | Synonymous |
| 225 | 25587 |          |   | C   | T   | L65L  | 5  | Synonymous |
| 226 | 25665 |          |   | C   | T   | Y91Y  | 1  | Synonymous |
| 227 | 25904 |          |   | C   | T   | S171L | 6  | Missense   |
| 228 | 26058 |          |   | C   | T   | D222D | 1  | Synonymous |
| 229 | 26060 |          |   | C   | T   | T223I | 5  | Missense   |
| 230 | 26270 | Envelope | 5 | C   | T   | T9I   | 27 | Missense   |
| 231 | 26296 |          |   | C   | A   | L18I  | 1  | Missense   |
| 232 | 26392 |          |   | A   | T   | S50C  | 1  | Missense   |
| 233 | 26438 |          |   | T   | C   | L65P  | 2  | Missense   |
| 234 | 26456 |          |   | C   | T   | P71L  | 6  | Missense   |
| 235 | 26530 | Membrane | 7 | A   | G   | D3G   | 19 | Missense   |
| 236 | 26577 |          |   | C   | G   | Q19E  | 25 | Missense   |
| 237 | 26709 |          |   | G   | A   | A63T  | 24 | Missense   |
| 238 | 26767 |          |   | T   | C   | I82T  | 4  | Missense   |
| 239 | 26858 |          |   | C   | T   | F112F | 4  | Synonymous |
| 240 | 26997 |          |   | T   | G   | C159G | 1  | Missense   |
| 241 | 27059 |          |   | C   | T   | Y179Y | 4  | Synonymous |
| 242 | 27193 | 3'UTR    | 1 | T   | C   | 27193 | 1  | extragenic |
| 243 | 27209 | ORF6     | 4 | A   | G   | H3R   | 1  | Missense   |
| 244 | 27259 |          |   | A   | C   | M19M  | 27 | Synonymous |
| 245 | 27382 |          |   | GAT | CTC | D61L  | 5  | Missense   |
| 246 | 27384 |          |   | T   | C   | D61D  | 1  | Synonymous |
| 247 | 27638 | ORF7a    | 2 | T   | C   | V82A  | 4  | Missense   |
| 248 | 27752 |          |   | C   | T   | T120I | 4  | Missense   |
| 249 | 27807 | ORF7b    | 9 | C   | T   | L17L  | 20 | Synonymous |
| 250 | 27873 |          |   | .   | G   | E39   | 1  | Insertion  |
| 251 | 27874 |          |   | C   | A   | T40N  | 1  | Missense   |
| 252 | 27874 |          |   | C   | T   | T40I  | 4  | Missense   |

|     |       |              |    |          |     |         |    |            |
|-----|-------|--------------|----|----------|-----|---------|----|------------|
| 253 | 27875 |              |    | .        | C   | T40     | 1  | Insertion  |
| 254 | 27879 |              |    | C        | .   | C41     | 1  | Deletion   |
| 255 | 27880 |              |    | A        | T   | H42L    | 1  | Missense   |
| 256 | 27882 |              |    | G        | .   | H42     | 1  | Deletion   |
| 257 | 27883 |              |    | C        | T   | A43V    | 1  | Missense   |
| 258 | 27921 | ORF8         | 9  | A        | T   | I10F    | 1  | Missense   |
| 259 | 27972 |              |    | C        | T   | Q27*    | 3  | SNP_stop   |
| 260 | 27998 |              |    | C        | T   | D35D    | 1  | Synonymous |
| 261 | 28048 |              |    | G        | T   | R52I    | 3  | Missense   |
| 262 | 28079 |              |    | G        | C   | V62V    | 1  | Synonymous |
| 263 | 28111 |              |    | A        | G   | Y73C    | 3  | Missense   |
| 264 | 28248 |              |    | GATTTC   | .   | D119    | 4  | Deletion   |
| 265 | 28253 |              |    | C        | T   | F120F   | 1  | Synonymous |
| 266 | 28253 |              |    | CA       | TC  | I121L   | 5  | Missense   |
| 267 | 28271 | 3'UTR        | 2  | A        | T   | 28271   | 27 | extragenic |
| 268 | 28273 |              |    | A        | .   | 28273   | 7  | extragenic |
| 269 | 28280 | Nucleocapsid | 20 | GAT      | CTA | D3L     | 3  | Missense   |
| 270 | 28310 |              |    | C        | T   | P13S    | 1  | Missense   |
| 271 | 28311 |              |    | C        | T   | P13L    | 26 | Missense   |
| 272 | 28362 |              |    | GAGAACGC | .   | E31     | 26 | Deletion   |
| 273 | 28461 |              |    | A        | G   | D63G    | 4  | Missense   |
| 274 | 28881 |              |    | G        | T   | R203M   | 2  | Missense   |
| 275 | 28881 |              |    | GG       | TT  | R203I   | 2  | Missense   |
| 276 | 28881 |              |    | GGG      | AAC | RG203KR | 30 | Missense   |
| 277 | 28887 |              |    | C        | T   | T205I   | 6  | Missense   |
| 278 | 28916 |              |    | G        | T   | G215C   | 4  | Missense   |
| 279 | 28977 |              |    | C        | T   | S235F   | 3  | Missense   |
| 280 | 28985 |              |    | G        | T   | G238C   | 1  | Missense   |
| 281 | 29014 |              |    | T        | C   | T247T   | 1  | Synonymous |

|     |       |       |   |                                    |   |       |   |                 |
|-----|-------|-------|---|------------------------------------|---|-------|---|-----------------|
| 282 | 29095 |       |   | C                                  | T | F274F | 1 | Synonymous      |
| 283 | 29144 |       |   | C                                  | T | E290E | 1 | Synonymous      |
| 284 | 29192 |       |   | T                                  | C | F307L | 2 | <b>Missense</b> |
| 285 | 29304 |       |   | C                                  | T | P344L | 5 | <b>Missense</b> |
| 286 | 29402 |       |   | G                                  | T | D377Y | 4 | <b>Missense</b> |
| 287 | 29433 |       |   | A                                  | G | K387R | 2 | <b>Missense</b> |
| 288 | 29510 |       |   | A                                  | C | S413R | 5 | <b>Missense</b> |
| 289 | 29545 | 3'UTR | 4 | C                                  | T | 29545 | 2 | extragenic      |
| 290 | 29734 |       |   | GAGGCCAC<br>GCGGAGTAC<br>GATCGAGTG | . | 29734 | 4 | extragenic      |
| 291 | 29736 |       |   | G                                  | T | 29736 | 1 | extragenic      |
| 292 | 29742 |       |   | G                                  | T | 29742 | 4 | extragenic      |
