# Supplementary material for: Genomic Surveillance of SARS-CoV-2 in the Southern Province of Zambia: Detection and Characterization of Alpha, Beta, Delta, and Omicron Variants of Concern
Source: MDPI journal article supplement (doi:10.3390/v14091865), 2022-08-24
Supplement: s1 [file s1]

## Supplementary Material

Table S4: Primer Map Results for linear 29903 residue sequence for Wuhan Seq Sanger V1 primers

```

>>>1_F>>> 35 to 56
1 ATTAAAGGTTTATACCTTCCCAGGTAACAAACCAACCAACTTTTCGATCTCTTGTAGATCT
1      10      20      30      40      50
1 TAATTTCCAAATATGGAAGGGTCCATTGTTTGGTTGGTTGAAAGCTAGAGAACATCTAGA
61 GTTCTCTAAACGAACTTTAAATCTGTGTGGCTGTCACTCGGCTGCATGCTTAGTGCACT
61      70      80      90      100     110
61 CAAGAGATTTGCTTGAAATTTTAGACACACCGACAGTGAGCCGACGTACGAATCACGTGA
121 CACGCAGTATAATTAATAACTAATTACTGTCTGACAGGACACGAGTAACGTCGTCTATC
121      130     140     150     160     170
121 GTGCGTCATATTAATTATTGATTAATGACAGCAACTGTCCTGTGCTCATTGAGCAGATAG
181 TTCTGCAGGCTGCTTACGGTTTCGTCCTGTTCGAGCCGATCATCAGCACATCTAGGTTT
181      190     200     210     220     230
181 AAGACGTCCGACGAATGCCAAAGCAGGCACAACGTCGGCTAGTAGTCGTGTAGATCCAAA
241 CGTCCGGGTGTGACCGAAAGGTAAGATGGAGAGCCTTGTCCCTGGTTTCAACGAGAAAAC
241      250     260     270     280     290
241 GCAGGCCACACTGGCTTTCCATTCTACCTCTCGGAACAGGGACCAAAGTTGCTCTTTTG
301 ACACGTCCAACCTCAGTTTGCCCTGTTTTACAGGTTTCGCGACGTGCTCGTACGTGGCTTTGG
301      310     320     330     340     350
301 TGTGCAGGTTGAGTCAAACGGACAAAATGTCCAAGCGCTGCACGAGCATGCACCGAAACC

<<<2_R<<< 411 to 432
361 AGACTCCGTGGAGGAGGTCTTATCAGAGGCACGTCAACATCTTAAAGATGGCACTTGTGG
361      370     380     390     400     410
361 TCTGAGGCACCTCCTCCAGAATAGTCTCCGTGCAGTTGTAGAATTTCTACCGTGAACACC
421 CTTAGTAGAAGTTGAAAAAGGCGTTTTGCCTCAACTTGAACAGCCCTATGTGTTTCATCAA
421      430     440     450     460     470
421 GAATCATCTTCAACTTTTTCCGCAAAACGGAGTTGAACTTGTCGGGATACACAAGTAGTT
481 ACGTTCCGGATGCTCGAACTGCACCTCATGGTCATGTTATGGTTGAGCTGGTAGCAGAACT
481      490     500     510     520     530
481 TGCAAGCCTACGAGCTTGACGTGGAGTACCAGTACAATACCAACTCGACCATCGTCTTGA
541 CGAAGGCATTACGTACGGTCGTAGTGGTGAGACACTTGGTGTCTTGTCCCTCATGTGGG
541      550     560     570     580     590
541 GCTTCCGTAAGTCATGCCAGCATCACCACCTCTGTGAACCACAGGAACAGGGAGTACACCC
601 CGAAATACCAGTGGCTTACCGCAAGGTTCTTCTTCGTAAGAACGGTAATAAAGGAGCTGG
601      610     620     630     640     650
601 GCTTTATGGTCAACGAATGGCGTTCCAAGAAGAAGCATTCTTGCCATTATTTTCTCGACC
661 TGGCCATAGTTACGGCGCCGATCTAAAGTCATTGACTTAGGCGACGAGCTTGGCACTGA
661      670     680     690     700     710
661 ACCGGTATCAATGCCGCGGCTAGATTTTCACTAAACTGAATCCGCTGCTCGAACCGTGACT
721 TCCTTATGAAGATTTTCAAGAAAACCTGGAACACTAAACATAGCAGTGGTGTTACCCGTGA
721      730     740     750     760     770
721 AGGAATACTTCTAAAAGTTCTTTTGACCTTGTGATTTGTATCGTCACCACAATGGGCACT
781 ACTCATGCGTGAGCTTAACGGAGGGGCATACACTCGCTATGTCGATAACAACCTTCTGTGG
781      790     800     810     820     830
781 TGAGTACGCACTCGAATTGCCTCCCCGTATGTGAGCGATACAGCTATTGTTGAAGACACC

>>>3_F>>> 898 to
917
841 CCCTGATGGCTACCCTCTTGAGTGCATTAAAGACCTTCTAGCACGTGCTGGTAAAGCTTC
841      850     860     870     880     890
841 GGGACTACCGATGGGAGAACTCACGTAATTTCTGGAAGATCGTGCACGACCATTTTCAAG
901 ATGCACTTTGTCCGAACAACCTGGACTTTATTGACACTAAGAGGGGTGTATACTGCTGCCG
901      910     920     930     940     950
901 TACGTGAAACAGGCTTGTGACCTGAAATAACTGTGATTCTCCCCACATATGACGACGGC

<<<4_R<<< 971 to 991

```

```

961 TGAACATGAGCATGAAATTGCTTGGTACACGGAACGTTCTTGAAAAGAGCTATGAATTGCA
961          970          980          990          1000          1010
961 ACTTGTACTIONGACTTTTAACGAACCATGTGCCTTGCAAGACTTTTCTCGATACTTAACGT
1021 GACACCTTTTGAATTTAAATTGGCAAAGAAATTTGACACCTTCAATGGGGAATGTCCAAA
1021          1030          1040          1050          1060          1070
1021 CTGTGGAACCTTTAATTTAACCGTTTCTTTAAACTGTGGAAGTTACCCCTTACAGGTTT
1081 TTTTGTATTTCCCTTAAATTCATAATCAAGACTATTCAACCAAGGGTTGAAAAGAAAAA
1081          1090          1100          1110          1120          1130
1081 AAAACATAAAGGGAATTTAAGGTATTAGTTCTGATAAGTTGGTTCCCAACTTTTCTTTTT
1141 GCTTGATGGCTTTATGGGTAGAATTCGATCTGTCTATCCAGTTGCGTCACCAAATGAATG
1141          1150          1160          1170          1180          1190
1141 CGAACTACCGAAATACCCATCTTAAGCTAGACAGATAGGTCAACGCAGTGGTTTACTTAC
1201 CAACCAAATGTGCCTTTCAACTCTCATGAAGTGTGATCATTGTGGTGAACTTCATGGCA
1201          1210          1220          1230          1240          1250
1201 GTTGGTTTACACGGAAGTTGAGAGTACTTCACACTAGTAACACCACCTTTGAAGTACCGT
1261 GACGGGCGATTTTGTAAAGCCACTTGCGAATTTTGTGGCACTGAGAATTTGACTAAAGA
1261          1270          1280          1290          1300          1310
1261 CTGCCCCGTAAAACAATTTCCGGTGAACGCTTAAACACCGTGACTCTTAACTGATTTCT
1321 AGGTGCCACTACTTGTGGTTACTTACCCCAAAATGCTGTTGTTAAATTTATTGTCCAGC
1321          1330          1340          1350          1360          1370
1321 TCCACGGTGATGAACACCAATGAATGGGGTTTACGACAACAATTTTAAATAACAGGTGCG
1381 ATGTCACAATTCAGAAGTAGGACCTGAGCATAGTCTTGCCGAATACCATAATGAATCTGG
1381          1390          1400          1410          1420          1430
1381 TACAGTGTTAAGTCTTCATCCTGGACTCGTATCAGAACGGCTTATGGTATTACTTAGACC
1441 CTTGAAAACCATTTCTCGTAAGGGTGGTCGCACTATTGCCTTTGGAGGCTGTGTGTTCTC
1441          1450          1460          1470          1480          1490
1441 GAACTTTTGGTAAGAAGCATTCCCACCAGCGTGATAACGGAACCTCCGACACACAAGAG
1501 TTATGTTGGTTGCCATAACAAGTGTGCCTATTGGGTTCACGTGCTAGCGCTAACATAGG
1501          1510          1520          1530          1540          1550
1501 AATACAACCAACGGTATTGTTTACACGGATAACCCAAGGTGCACGATCGCGATTGTATCC
1561 TTGTAACCATAACAGGTGTTGTTGGAGAAGGTCCGAAGGTCTTAATGACAACCTTCTTGA
1561          1570          1580          1590          1600          1610
1561 AACATTGGTATGTCCACAACAACCTCTTCCAAGGCTTCCAGAATTACTGTTGGAAGAACT
1621 AATACTCCAAAAGAGAAAGTCAACATCAATATTGTTGGTGACTTTAACTTAATGAAGA
1621          1630          1640          1650          1660          1670
1621 TTATGAGGTTTTTCTCTTTCAGTTGTAGTTATAACAACCACTGAAATTTGAATTACTTCT
          >>>5_F>>> 1724 to 1743
1681 GATCGCCATTATTTTGGCATCTTTTTCTGCTTCCACAAGTGCTTTTGTGGAACTGTGAA
1681          1690          1700          1710          1720          1730
1681 CTAGCGGTAATAAAACCGTAGAAAAAGACGAAGGTGTTACGAAAAACACCTTTGACACTT
1741 AGGTTTGGATTATAAAGCATTCAAACAAATTGTTGAATCCTGTGGTAATTTTAAAGTTAC
1741          1750          1760          1770          1780          1790
1741 TCCAAACCTAATATTTTCGTAAGTTTGTTTAACAACCTAGGACACCATTAATAATTTCAATG
          <<<6_R<<< 1853 to 1874
1801 AAAAGGAAAAGCTAAAAAAGGTGCCTGGAATATTGGTGAACAGAAATCAATACTGAGTCC
1801          1810          1820          1830          1840          1850
1801 TTTTCTTTTTCGATTTTTTCCACGGACCTTATAACCACTTGTCTTTAGTTATGACTCAGG
1861 TCTTTATGCATTTGCATCAGAGGCTGCTCGTGTGTACGATCAATTTTCTCCCGCACTCT
1861          1870          1880          1890          1900          1910
1861 AGAAATACGTAAACGTAGTCTCCGACGAGCACAACATGCTAGTTAAAAGAGGGCGTGAGA
1921 TGAACTGCTCAAAATCTGTGCGTGTTTTACAGAAGGCCGCTATAACAATACTAGATGG
1921          1930          1940          1950          1960          1970
1921 ACTTTGACGAGTTTTAAGACACGCACAAAATGTCTTCCGGCGATATTGTTATGATCTACC
1981 AATTTACAGTATTCACTGAGACTCATTGATGCTATGATGTTACATCTGATTTGGCTAC
1981          1990          2000          2010          2020          2030
1981 TTAAAGTGTCAATAAGTACTCTGAGTAACTACGATACTACAAGTGTAGACTAAACCGATG
2041 TAACAATCTAGTTGTAATGGCCTACATTACAGGTGGTGTGTTTCAAGTTGACTTCGCAGTG
2041          2050          2060          2070          2080          2090
2041 ATTGTTAGATCAACATTACCGGATGTAATGTCCACCACAACAAGTCAACTGAAGCGTCAC

```

2101 GCTAACTAACATCTTTGGCACTGTTTATGAAAACTCAAACCCGTCCTTGATTGGCTTGA  
2101 2110 2120 2130 2140 2150  
2101 CGATTGATTGTAGAAACCGTGACAAATACTTTTGAGTTTGGGCAGGAACCTAACCGAACT  
2161 AGAGAAGTTTAAAGGAAGGTGTAGAGTTTCTTAGAGACGGTTGGGAAATTGTTAAATTTAT  
2161 2170 2180 2190 2200 2210  
2161 TCTCTTCAAATTCCTTCCACATCTCAAAGAATCTCTGCCAACCTTTAACAATTTAAATA  
2221 CTCAACCTGTGCTTGTGAAATTGTCGGTGGACAAATTGTCACCTGTGCAAAGGAAATTAA  
2221 2230 2240 2250 2260 2270  
2221 GAGTTGGACACGAACACTTTTAACAGCCACCTGTTTAACAGTGGACACGTTTCCTTTAATT  
2281 GGAGAGTGTTCAGACATTCTTTAAGCTTGTAATAAAATTTTTGGCTTTGTGTGCTGACTC  
2281 2290 2300 2310 2320 2330  
2281 CCTCTCACAAGTCTGTAAGAAATTCGAACATTTATTTAAAAACCGAAACACACGACTGAG  
2341 TATCATTATTGGTGGAGCTAAACTTAAAGCCTTGAATTTAGGTGAAACATTTGTCACGCA  
2341 2350 2360 2370 2380 2390  
2341 ATAGTAATAACACCTCGATTGTAATTCGGAACCTAAATCCACTTTGTAAACAGTGCCT  
2401 CTCAAAGGGATTGTACAGAAAGTGTGTTAAATCCAGAGAAGAACTGGCCTACTCATGCC  
2401 2410 2420 2430 2440 2450  
2401 GAGTTTCCCTAACATGTCTTTCACACAATTTAGGTCTCTTCTTTGACCGGATGAGTACGG  
2461 TCTAAAAGCCCCAAAAGAAATTATCTTCTTAGAGGGAGAAACACTTCCCACAGAAGTGT  
2461 2470 2480 2490 2500 2510  
2461 AGATTTTCGGGGTTTTCTTTAATAGAAGAATCTCCCTCTTTGTGAAGGGTGTCTTCACAA  
>>>7\_F>>> 2553 to 2575  
2521 AACAGAGGAAGTTGTCTTGAAAACCTGGTGATTTACAACCATTAGAACAACCTACTAGTGA  
2521 2530 2540 2550 2560 2570  
2521 TTGTCTCCTTCAACAGAACTTTTGACCACTAAATGTTGGTAATCTTGTGGATGATCACT  
2581 AGCTGTTGAAGCTCCATTGGTTGGTACACCAGTTTGTATTACGGGCTTATGTTGCTCGA  
2581 2590 2600 2610 2620 2630  
2581 TCGACAACCTTCGAGGTAACCAACCATGTGGTCAAACATAATTGCCCGAATACAACGAGCT  
<<<8\_R<<< 2691 to 2712  
2641 AATCAAAGACACAGAAAAGTACTGTGCCCTTGACCTAATATGATGGTAACAAACAATAC  
2641 2650 2660 2670 2680 2690  
2641 TTAGTTTCTGTGTCTTTTCATGACACGGGAACGTGGATTATACTACCATTGTTTGTATG  
2701 CTTCACTCAAAAGGCGGTGCACCAACAAAGGTTACTTTTGGTGATGACACTGTGATAGA  
2701 2710 2720 2730 2740 2750  
2701 GAAGTGTGAGTTTCCGCCACGTGGTTGTTTCCAATGAAAACCACTACTGTGACACTATCT  
2761 AGTGCAAGGTTACAAGAGTGTGAATATCACTTTGAACTTGATGAAAGGATTGATAAAGT  
2761 2770 2780 2790 2800 2810  
2761 TCACGTTCCAATGTTTCTCACACTTATAGTGAAAACCTGAACTACTTTCCTAACTATTTCA  
2821 ACTTAATGAGAAGTGCTCTGCCTATACAGTTGAACTCGGTACAGAAGTAAATGAGTTCGC  
2821 2830 2840 2850 2860 2870  
2821 TGAATTACTCTTCACGAGACGGATATGTCAACTTGAGCCATGTCTTCATTTACTCAAGCG  
2881 CTGTGTTGTGGCAGATGCTGTCATAAAAACTTTGCAACCAGTATCTGAATTACTTACACC  
2881 2890 2900 2910 2920 2930  
2881 GACACAACACCGTCTACGACAGTATTTTTGAAACGTTGGTCATAGACTTAATGAATGTGG  
2941 ACTGGGCATTGATTTAGATGAGTGGAGTATGGCTACATACTACTTATTTGATGAGTCTGG  
2941 2950 2960 2970 2980 2990  
2941 TGACCCGTAACATAATCTACTCACCTCATACCGATGTATGATGAATAAACTACTCAGACC  
3001 TGAGTTTAAATTGGCTTCACATATGTATTGTTCTTTCTACCCTCCAGATGAGGATGAAGA  
3001 3010 3020 3030 3040 3050  
3001 ACTCAAATTTAACCGAAGTGATACATAACAAGAAAGATGGGAGGTCTACTCCTACTTCT  
3061 AGAAGGTGATTGTGAAGAAGAAGAGTTTGAGCCATCAACTCAATATGAGTATGGTACTGA  
3061 3070 3080 3090 3100 3110  
3061 TCTTCCACTAACACTTCTTCTTCTCAAACCTCGGTAGTTGAGTTATACTCATACCATGACT  
3121 AGATGATTACCAAGGTAAACCTTTGGAATTTGGTGCCACTTCTGCTGCTCTTCAACCTGA  
3121 3130 3140 3150 3160 3170  
3121 TCTACTAATGGTTCCATTTGGAAACCTTAAACCACGGTGAAGACGACGAGAAGTTGGACT  
3181 AGAAGAGCAAGAAGAAGATTGGTTAGATGATGATAGTCAACAACTGTTGGTCAACAAGA  
3181 3190 3200 3210 3220 3230  
3181 TCTTCTCGTTCTTCTTCTAACCAATCTACTACTATCAGTTGTTTGAACACAGTTGTTCT

```

3241 CGGCAGTGAGGACAATCAGACAACACTACTATTCAAACAATTGTTGAGGTTCAACCTCAATT
3241          3250          3260          3270          3280          3290
3241 GCCGTCACCTCCTGTTAGTCTGTTGATGATAAGTTTGTTAACAACCTCCAAGTTGGAGTTAA
3301 AGAGATGGAACCTTACACCAGTTGTTTCAGACTATTGAAGTGAATAGTTTTAGTGGTTATTT
3301          3310          3320          3330          3340          3350
3301 TCTCTACCTTGAATGTGGTCAACAAGTCTGATAACTTCACTTATCAAAATCACCAATAAA
3361 AAAACTTACTGACAATGTATACATTAAAAATGCAGACATTGTGGAAGAAGCTAAAAAGGT
3361          3370          3380          3390          3400          3410
3361 TTTTGAATGACTGTTACATATGTAATTTTACGTCTGTAACACCTTCTTCGATTTTTTCCA
      >>>9_F>>> 3436 to 3457
3421 AAAACCAACAGTGGTTGTTAATGCAGCCAATGTTTACCTTAAACATGGAGGAGGTGTTGC
3421          3430          3440          3450          3460          3470
3421 TTTTGGTTGTCCACCAACAATTACGTCGGTTACAAATGGAATTTGTACCTCCTCCACAACG
      <<<10_R<<< 3535 to

```

3556

```

3481 AGGAGCCTTAAATAAGGCTACTAACAATGCCATGCAAGTTGAATCTGATGATTACATAGC
3481          3490          3500          3510          3520          3530
3481 TCCTCGGAATTTATTCCGATGATTGTTACGGTACGTTCAACTTAGACTACTAATGTATCG
3541 TACTAATGGACCACTTAAAGTGGGTGGTAGTTGTGTTTTAAGCGGACACAATCTTGCTAA
3541          3550          3560          3570          3580          3590
3541 ATGATTACCTGGTGAATTTACCCACCATCAACACAAAATTCGCCTGTGTTAGAACGATT
3601 ACACTGTCTTCATGTTGTGCGGCCAAATGTTAACAAAGGTGAAGACATTCAACTTCTTAA
3601          3610          3620          3630          3640          3650
3601 TGTGACAGAAGTACAACAGCCGGGTTTACAATTGTTTCCACTTCTGTAAGTTGAAGAATT
3661 GAGTGCTTATGAAAATTTAATCAGCACGAAGTTCTACTTGCACCATTATTATCAGCTGG
3661          3670          3680          3690          3700          3710
3661 CTCACGAATACTTTTAAAATTAGTCGTGCTTCAAGATGAACGTGGTAATAATAGTCGACC
3721 TATTTTTGGTGCTGACCCTATACATTCTTTAAGAGTTTGTGTAGATACTGTTTCGCACAAA
3721          3730          3740          3750          3760          3770
3721 ATAAAAACCACGACTGGGATATGTAAGAAATTTCTCAAACACATCTATGACAAGCGTGTTT
3781 TGTCTACTTAGCTGTCTTTGATAAAAAATCTCTATGACAACTTGTTTCAAGCTTTTTTGA
3781          3790          3800          3810          3820          3830
3781 ACAGATGAATCGACAGAACTATTTTTAGAGATACTGTTTGAACAAAGTTTCGAAAAACCT
3841 AATGAAGAGTGAAAAGCAAGTTGAACAAAAGATCGCTGAGATTCTTAAAGAGGAAGTTAA
3841          3850          3860          3870          3880          3890
3841 TTACTTCTCACTTTTCGTTCAACTTGTTTTCTAGCGACTCTAAGGATTTCTCCTTCAATT
3901 GCCATTTATAACTGAAAGTAAACCTTCAGTTGAACAGAGAAAACAAGATGATAAGAAAAT
3901          3910          3920          3930          3940          3950
3901 CGGTAAATATTGACTTTTCATTTGGAAGTCAACTTGCTCTTTTTGTTCTACTATTCTTTTA
3961 CAAAGCTTGTGTTGAAGAAGTTACAACAACCTCTGGAAGAAACTAAGTTTCTCACAGAAAA
3961          3970          3980          3990          4000          4010
3961 GTTTCGAACACAACCTTCTTCAATGTTGTTGAGACCTTCTTTGATTCAAGGAGTGTCTTTT
4021 CTTGTTACTTTTATATTGACATTAATGGCAATCTTCATCCAGATTCTGCCACTCTTGTTAG
4021          4030          4040          4050          4060          4070
4021 GAACAATGAAATATAACTGTAATTACCGTTAGAAGTAGGTCTAAGACGGTGAGAACAATC
4081 TGACATTGACATCACTTTCTTAAAGAAAGATGCTCCATATATAGTGGGTGATGTTGTTCA
4081          4090          4100          4110          4120          4130
4081 ACTGTAAGTGTAGTGAAAGAATTTCTTTCTACGAGGTATATATCACCCACTACAACAAGT
4141 AGAGGGTGTTTTAACTGCTGTGGTTATACCTACTAAAAAGGCTGGTGGCACTACTGAAAT
4141          4150          4160          4170          4180          4190
4141 TCTCCACAAAAATTGACGACACCAATATGGATGATTTTTCCGACCACCGTGATGACTTTA
4201 GCTAGCGAAAGCTTTGAGAAAAGTGCCAACAGACAATTATATAACCACTTACCCGGGTCA
4201          4210          4220          4230          4240          4250
4201 CGATCGCTTTTCGAAACTCTTTTACGGTTGTCTGTTAATATATTGGTGAATGGGCCCAGT
      >>>11_F>>> 4267 to 4288
4261 GGGTTTTAAATGGTTACACTGTAGAGGAGGCAAAGACAGTGCTTAAAAAGTGTAAGTGTC
4261          4270          4280          4290          4300          4310
4261 CCCAAATTTACCAATGTGACATCTCCTCCGTTTCTGTGCACGAATTTTTTACATTTTACG
4321 CTTTTACATTCTACCATCTATTATCTCTAATGAGAAGCAAGAAATTTCTTGGAAGTGTTC

```

|      |                                                                 |      |      |      |      |
|------|-----------------------------------------------------------------|------|------|------|------|
| 4321 | 4330                                                            | 4340 | 4350 | 4360 | 4370 |
| 4321 | GAAAAATGTAAGATGGTAGATAATAGAGATTACTCTTCGTTCTTTAAGAACCTTGACAAAG   |      |      |      |      |
|      | <<<12_R<<< 4409 to 4431                                         |      |      |      |      |
| 4381 | TTGGAATTTGCGAGAAATGCTTGACATGCAGAAGAAACACGCAAATTAATGCCTGTCTG     |      |      |      |      |
| 4381 | 4390                                                            | 4400 | 4410 | 4420 | 4430 |
| 4381 | AACCTTAAACGCTCTTTACGAACGTGTACGTCTTCTTGTGCGTTTAATTACGGACAGAC     |      |      |      |      |
| 4441 | TGTGGAAACTAAAGCCATAGTTTTCAACTATACAGCGTAAATATAAGGGTATTAAATACA    |      |      |      |      |
| 4441 | 4450                                                            | 4460 | 4470 | 4480 | 4490 |
| 4441 | ACACCTTTGATTTTCGGTATCAAAGTTGATATGTCGCATTTATATTCCCATAATTTTATGT   |      |      |      |      |
| 4501 | AGAGGGTGTGGTTGATTATGGTGCTAGATTTTACTTTTACACCAGTAAAACAACCTGTAGC   |      |      |      |      |
| 4501 | 4510                                                            | 4520 | 4530 | 4540 | 4550 |
| 4501 | TCTCCACACCAACTAATACCACGATCTAAAATGAAAATGTGGTCATTTTGTGTGACATCG    |      |      |      |      |
| 4561 | GTCACCTTATCAACACACTTAACGATCTAAATGAAACTCTTGTTACAATGCCACTTGGCTA   |      |      |      |      |
| 4561 | 4570                                                            | 4580 | 4590 | 4600 | 4610 |
| 4561 | CAGTGAATAGTTGTGTGAATTGCTAGATTTACTTTGAGAACAATGTTACGGTGAACCGAT    |      |      |      |      |
| 4621 | TGTAACACATGGCTTAAATTTGGAAGAAGCTGCTCGGTATATGAGATCTCTCAAAGTGCC    |      |      |      |      |
| 4621 | 4630                                                            | 4640 | 4650 | 4660 | 4670 |
| 4621 | ACATTGTGTACCGAATTTAAACCTTCTTCGACGAGCCATATACTCTAGAGAGTTTCACGG    |      |      |      |      |
| 4681 | AGCTACAGTTTCTGTTTCTTCACCTGATGCTGTTACAGCGTATAATGGTTATCTTACTTC    |      |      |      |      |
| 4681 | 4690                                                            | 4700 | 4710 | 4720 | 4730 |
| 4681 | TCGATGTCAAAGACAAAGAAGTGGACTACGACAATGTCGCATATTACCAATAGAATGAAG    |      |      |      |      |
| 4741 | TTCTTCTAAAACACCTGAAGAACATTTTATTGAAACCATCTCACTTGCTGGTTCCCTATAA   |      |      |      |      |
| 4741 | 4750                                                            | 4760 | 4770 | 4780 | 4790 |
| 4741 | AAGAAGATTTTGTGGACTTCTTGTAATAAATCTTTGGTAGAGTGAACGACCAAGGATATT    |      |      |      |      |
| 4801 | AGATTGGTCCTATTCTGGACAATCTACACAAGTATAGAATTTCTTAAAGAGAGGTGA       |      |      |      |      |
| 4801 | 4810                                                            | 4820 | 4830 | 4840 | 4850 |
| 4801 | TCTAACCAGGATAAGACCTGTTAGATGTGTTGATCCATATCTTAAAGAATTCTCTCCACT    |      |      |      |      |
| 4861 | TAAAGTGTATATTACACTAGTAATCCTACCACATTCCACCTAGATGGTGAAGTTATCAC     |      |      |      |      |
| 4861 | 4870                                                            | 4880 | 4890 | 4900 | 4910 |
| 4861 | ATTTTTCACATATAATGTGATCATTAGGATGGTGTAAAGGTGGATCTACCACTTCAATAGTG  |      |      |      |      |
| 4921 | CTTTGACAATCTTAAGACACTTCTTTCTTTGAGAGAAGTGAGGACTATTAAGGTGTTTAC    |      |      |      |      |
| 4921 | 4930                                                            | 4940 | 4950 | 4960 | 4970 |
| 4921 | GAAACTGTTAGAATTCTGTGAAGAAAGAACTCTCTTCACTCCTGATAATTCCACAAATG     |      |      |      |      |
| 4981 | AACAGTAGACAACATTAACCTCCACGCAAGTTGTGGACATGTCAATGACATATGGACA      |      |      |      |      |
| 4981 | 4990                                                            | 5000 | 5010 | 5020 | 5030 |
| 4981 | TTGTCATCTGTTGTAATTGGAGGTGTGCGTTCAACACCTGTACAGTTACTGTATACCTGT    |      |      |      |      |
| 5041 | ACAGTTTGGTCCAACCTATTGTTGGATGGAGCTGATGTTACTAAAAATAAACCTCATAATTC  |      |      |      |      |
| 5041 | 5050                                                            | 5060 | 5070 | 5080 | 5090 |
| 5041 | TGTCAAACCAGGTTGAATAAACCTACCTCGACTACAATGATTTTATTTTGGAGTATTAAG    |      |      |      |      |
|      | >>>13_F>>> 5126 to 5148                                         |      |      |      |      |
| 5101 | ACATGAAGGTAAAACATTTTATGTTTTACCTAATGATGACACTCTACGTGTTGAGGCTTT    |      |      |      |      |
| 5101 | 5110                                                            | 5120 | 5130 | 5140 | 5150 |
| 5101 | TGTAATTCTTCACTTTTGTAAAATACAAAATGGATTACTACTGTGAGATGCACAACCTCCGAA |      |      |      |      |
| 5161 | TGAGTACTACCACACAACCTGATCCTAGTTTTCTGGGTAGGTACATGTCAGCATTAATCA    |      |      |      |      |
| 5161 | 5170                                                            | 5180 | 5190 | 5200 | 5210 |
| 5161 | ACTCATGATGGTGTGTTGACTAGGATCAAAAGACCCATCCATGTACAGTCGTAATTTAGT    |      |      |      |      |
|      | <<<14_R<<< 5232 to 5253                                         |      |      |      |      |
| 5221 | CACTAAAAAGTGGAAATACCCACAAGTTAATGGTTTAACTTCTATTAAATGGGCAGATAA    |      |      |      |      |
| 5221 | 5230                                                            | 5240 | 5250 | 5260 | 5270 |
| 5221 | GTGATTTTTTCACCTTTATGGGTGTTCAATTACCAAATTGAAGATAATTTACCCGTCTATT   |      |      |      |      |
| 5281 | CAACTGTTATCTTGCCACTGCATTGTTAACAACCTCCAACAAATAGAGTTGAAGTTTAATCC  |      |      |      |      |
| 5281 | 5290                                                            | 5300 | 5310 | 5320 | 5330 |
| 5281 | GTTGACAATAGAACGGTGACGTAACAATTGTGAGGTTGTTTATCTCAACTTCAAATTAGG    |      |      |      |      |
| 5341 | ACCTGCTCTACAAGATGCTTATTACAGAGCAAGGGCTGGTGAAGCTGCTAACTTTTGTGC    |      |      |      |      |
| 5341 | 5350                                                            | 5360 | 5370 | 5380 | 5390 |
| 5341 | TGGACGAGATGTTCTACGAATAATGTCTCGTTCCCGACCACTTCGACGATTGAAAACACG    |      |      |      |      |
| 5401 | ACTTATCTTAGCCTACTGTAATAAGACAGTAGGTGAGTTAGGTGATGTTAGAGAAACAAT    |      |      |      |      |
| 5401 | 5410                                                            | 5420 | 5430 | 5440 | 5450 |
| 5401 | TGAATAGAATCGGATGACATTATTCTGTCATCCACTCAATCCACTACAATCTCTTTGTT     |      |      |      |      |

5461 GAGTTACTTGTTCACATGCCAATTTAGATTCTTGCAAAAGAGTCTTGAACGTGGTGTG  
5461 5470 5480 5490 5500 5510  
5461 CTCAATGAACAAAGTTGTACGGTTAAATCTAAGAACGTTTTCTCAGAACTTGCACCACAC  
5521 TAAAACTTGTGGACAACAGCAGACAACCCCTTAAGGGTGTAGAAGCTGTTATGTACATGGG  
5521 5530 5540 5550 5560 5570  
5521 ATTTTGAACACCTGTTGTCGTCTGTTGGGAATTTCCACATCTTCGACAATACATGTACCC  
5581 CACACTTTCTTATGAACAATTTAAGAAAGGTGTTTACAGATACCTTGTACGTGTGGTAAACA  
5581 5590 5600 5610 5620 5630  
5581 GTGTGAAAGAATACTTGTAAATTTCTTCCACAAGTCTATGGAACATGCACACCATTGT  
5641 AGCTACAAAATATCTAGTACAACAGGAGTCACCTTTTGTATGATGTCAGCACCACCTGC  
5641 5650 5660 5670 5680 5690  
5641 TCGATGTTTTATAGATCATGTTGTCCTCAGTGGAAAACAATACTACAGTCGTGGTGGACG  
5701 TCAGTATGAACCTAAGCATGGTACATTTACTTGTGCTAGTGAGTACACTGGTAATTACCA  
5701 5710 5720 5730 5740 5750  
5701 AGTCATACTTGAATTCGTACCATGTAAATGAACACGATCACTCATGTGACCATTAAATGGT  
5761 GTGTGGTCACTATAAACATATAACTTCTAAAGAACTTTGTATTGCATAGACGGTGCTTT  
5761 5770 5780 5790 5800 5810  
5761 CACACCAGTGATATTTGTATATTGAAGATTTCTTTGAAACATAACGTATCTGCCACGAAA  
5821 ACTTACAAAGTCCTCAGAATACAAAGGTCCTATTACGGATGTTTTCTACAAAGAAAACAG  
5821 5830 5840 5850 5860 5870  
5821 TGAATGTTTCAGGAGTCTTATGTTTCCAGGATAATGCCTACAAAAGATGTTTCTTTTGTG  
>>>15\_F>>> 5913 to 5934  
5881 TTACACAACAACCATAAAAACCAGTTACTTATAAATTGGATGGTGTGTTTGTACAGAAAT  
5881 5890 5900 5910 5920 5930  
5881 AATGTGTTGTTGGTATTTTGGTCAATGAATATTTAACCTACCACAACAAACATGTCTTTA  
5941 TGACCCTAAGTTGGACAATTATTATAAGAAAGACAATTCTTATTTACAGAGCAACCAAT  
5941 5950 5960 5970 5980 5990  
5941 ACTGGGATTCAACCTGTTAATAATATTCTTTCTGTTAAGAATAAAGTGTCTCGTTGGTTA  
6001 TGATCTTGTACCAAACCAACCATATCCAAACGCAAGCTTCGATAATTTTAAGTTTGTATG  
6001 6010 6020 6030 6040 6050  
6001 ACTAGAACATGGTTTGGTTGGTATAGGTTTGC GTTCGAAGCTATTAAAATTCAAACATAC  
<<<16\_R<<< 6102 to 6125  
6061 TGATAATATCAAATTTGCTGATGATTTAAACCAGTTAACTGGTTATAAGAAACCTGCTTC  
6061 6070 6080 6090 6100 6110  
6061 ACTATTATAGTTTAAACGACTACTAAATTTGGTCAATTGACCAATATTCTTTGGACGAAG  
6121 AAGAGAGCTTAAAGTTACATTTTCCCTGACTTAAATGGTGATGTGGTGGCTATTGATTA  
6121 6130 6140 6150 6160 6170  
6121 TTCTCTCGAATTTCAATGTAAAAAGGGACTGAATTTACCACTACACCACCGATAACTAAT  
6181 TAAACACTACACCCCTCTTTTAAAGAAAGGAGCTAAATTGTTACATAAACCTATTGTTTG  
6181 6190 6200 6210 6220 6230  
6181 ATTTGTGATGTGTGGGAGAAAATTTCTTCCCTCGATTTAACAATGTATTTGGATAACAAAC  
6241 GCATGTTAACAATGCAACTAATAAAGCCACGTATAAACCAAATACCTGGTGTATACGTTG  
6241 6250 6260 6270 6280 6290  
6241 CGTACAATTGTTACGTTGATTATTTCCGTGCATATTTGGTTTATGGACCACATATGCAAC  
6301 TCTTTGGAGCACAAAACCAGTTGAAACATCAAATTCGTTTGATGTACTGAAGTCAGAGGA  
6301 6310 6320 6330 6340 6350  
6301 AGAAACCTCGTGTGTTTGGTCAACTTTGTAGTTTAAAGCAAACCTACATGACTTCAGTCTCCT  
6361 CGCGCAGGGAATGGATAATCTTGCCGCGAAGATCTAAAACCAGTCTCTGAAGAAGTAGT  
6361 6370 6380 6390 6400 6410  
6361 GCGCGTCCCTTACCTATTAGAACGGACGCTTCTAGATTTTGGTCAGAGACTTCTTCATCA  
6421 GGAAAATCCTACCATAACAGAAAGACGTTCTTGAGTGTAATGTGAAAACCTACCGAAGTTGT  
6421 6430 6440 6450 6460 6470  
6421 CCTTTTAGGATGGTATGTCTTTCTGCAAGAACTCACATTACACTTTTGATGGCTTCAACA  
6481 AGGAGACATTATACTTAAACCAGCAAATAATAGTTTAAAAATTACAGAAGAGGTTGGCCA  
6481 6490 6500 6510 6520 6530  
6481 TCCTCTGTAATATGAATTTGGTCGTTTATTATCAAATTTTAAATGTCTTCTCCAACCGGT  
6541 CACAGATCTAATGGCTGCTTATGTAGACAATTCTAGTCTTACTATTAAGAAACCTAATGA  
6541 6550 6560 6570 6580 6590  
6541 GTGTCTAGATTACCGACGAATACATCTGTTAAGATCAGAATGATAATTCTTTGGATTACT

6601 ATTATCTAGAGTATTAGGTTTGA AACCCCTTGCTACTCATGGTTTAGCTGCTGTTAATAG  
6601           6610           6620           6630           6640           6650  
6601 TAATAGATCTCATAATCCAACTTTTGGGAACGATGAGTACCAATCGACGACAATTATC  
6661 TGTCCCTTGGGATACTATAGCTAATTATGCTAAGCCTTTTCTTAACAAAGTTGTTAGTAC  
6661           6670           6680           6690           6700           6710  
6661 ACAGGGAACCCCTATGATATCGATTAATACGATTCGGAAGAATTGTTTCAACAATCATG  
>>>17\_F>>> 6750 to 6774  
6721 AACTACTAACATAGTTACACGGTGTAAACCGTGTGTACTAATTATATGCCTTATTT  
6721           6730           6740           6750           6760           6770  
6721 TTGATGATTGTATCAATGTGCCACAAATTTGGCACAAACATGATTAATATACGGAATAAA  
6781 CTTTACTTTTATTGCTACAATTGTGTACTTTTACTAGAAGTACAAATTCTAGAATTAAAGC  
6781           6790           6800           6810           6820           6830  
6781 GAAATGAAATAACGATGTTAACACATGAAAAATGATCTTCATGTTTAAGATCTTAATTTTCG  
<<<18\_R<<< 6865 to 6886  
6841 ATCTATGCCGACTACTATAGCAAAGAACTGTTAAGAGTGTCGGTAAATTTTGTCTAGA  
6841           6850           6860           6870           6880           6890  
6841 TAGATACGGCTGATGATATCGTTTCTTATGACAATTCTCACAGCCATTTAAACAGATCT  
6901 GGCTTCATTTAATTATTTGAAGTCACCTAATTTTCTAAACTGATAAATATTATAATTTG  
6901           6910           6920           6930           6940           6950  
6901 CCGAAGTAAATTAATAAACTTCAGTGGATTAAAAAGATTTGACTATTTATAATATTAAC  
6961 GTTTTTACTATTAAGTGTTCCTAGGTTCTTTAATCTACTCAACCGCTGCTTTAGGTGT  
6961           6970           6980           6990           7000           7010  
6961 CAAAAATGATAATTCACAAACGGATCCAAGAAATTAGATGAGTTGGCGACGAAATCCACA  
7021 TTTAATGTCTAATTTAGGCATGCCTTCTTACTGTACTGGTTACAGAGAAGGCTATTTGAA  
7021           7030           7040           7050           7060           7070  
7021 AAATTACAGATTAAATCCGTACGGAAGAATGACATGACCAATGTCTCTTCCGATAAACTT  
7081 CTCTACTAATGTCACATTGCAACCTACTGTACTGGTTCTATACCTTGTAGTGTGTCT  
7081           7090           7100           7110           7120           7130  
7081 GAGATGATTACAGTGATAACGTTGGATGACATGACCAAGATATGGAACATCACAAACAGA  
7141 TAGTGGTTTAGATTCTTTAGACACCTATCCTTCTTTAGAACTATACAAATTACCATTTT  
7141           7150           7160           7170           7180           7190  
7141 ATCACCAAATCTAAGAAATCTGTGGATAGGAAGAAATCTTTGATATGTTTAATGGTAAAG  
7201 ATCTTTTAAATGGGATTTAACTGCTTTTGGCTTAGTTGCAGAGTGGTTTTTGGCATATAT  
7201           7210           7220           7230           7240           7250  
7201 TAGAAAATTTACCCTAAATTGACGAAAACCGAATCAACGTCTCACCAAAAACCGTATATA  
7261 TCTTTTCTACTAGGTTTTTCTATGTACTTGGATTGGCTGCAATCATGCAATTGTTTTTCAG  
7261           7270           7280           7290           7300           7310  
7261 AGAAAAGTGATCCAAAAGATACATGAACCTAACCGACGTTAGTACGTTAACAAAAGTC  
7321 CTATTTTGCAGTACATTTTATTAGTAATTCTTGGCTTATGTGGTTAATAATTAATCTTGT  
7321           7330           7340           7350           7360           7370  
7321 GATAAACGTCATGTAAAATAATCATTAAGAACCGAATACACCAATTATTAATTAGAACA  
7381 ACAAATGGCCCCGATTTTACGCTATGGTTAGAATGTACATCTTCTTGCATCATTTTTATTA  
7381           7390           7400           7410           7420           7430  
7381 TGTTTACCGGGGCTAAAGTCGATACCAATCTTACATGTAGAAGAAACGTAGTAAAATAAT  
7441 TGTATGGAAGTTATGTGCATGTTGTAGACGGTTGTAATTCATCAACTTGATGATGTG  
7441           7450           7460           7470           7480           7490  
7441 ACATACCTTTTCAATACACGTACAACATCTGCCAACATTAAGTAGTTGAACATACTACAC  
>>>19\_F>>> 7515 to 7536  
7501 TTACAAACGTAATAGAGCAACAAGAGTCGAATGTACAATGTTAATGGTGTTAGAAG  
7501           7510           7520           7530           7540           7550  
7501 AATGTTTGCATTATCTCGTTGTTCTCAGCTTACATGTTGATAACAATTACCACAATCTTC  
7561 GTCCTTTTATGTCTATGCTAATGGAGGTAAAGGCTTTTGCAAACTACACAATTGGAATTG  
7561           7570           7580           7590           7600           7610  
7561 CAGGAAAATACAGATACGATTACCTCCATTTCCGAAAACGTTTGATGTGTAACTTAAC  
<<<20\_R<<< 7662 to 7682  
7621 TGTTAATTGTGATACATTCTGTGCTGGTAGTACATTTATTAGTGATGAAGTTGCGAGAGA  
7621           7630           7640           7650           7660           7670  
7621 ACAATTAACACTATGTAAGACACGACCATCATGTAAATAATCACTACTTCAACGCTCTCT  
7681 CTTGTCACTACAGTTTAAAGACCAATAAATCCTACTGACCAGTCTTCTTACATCGTTGA

7681                7690                7700                7710                7720                7730  
7681 GAACAGTGATGTCAAATTTTCTGGTTATTTAGGATGACTGGTCAGAAGAATGTAGCAACT  
7741 TAGTGTTACAGTGAAGAATGGTTCATCCATCTTTACTTTGATAAAGCTGGTCAAAGAC  
7741                7750                7760                7770                7780                7790  
7741 ATCACAATGTCACCTTCTTACCAAGGTAGGTAGAAATGAACTATTTTCGACCAGTTTCTG  
7801 TTATGAAAGACATTCTCTCTCTCATTTTGTTAACTTAGACAACCTGAGAGCTAATAACAC  
7801                7810                7820                7830                7840                7850  
7801 AATACTTTCTGTAAGAGAGAGAGTAAAACAATTGAATCTGTTGGACTCTCGATTATTGTG  
7861 TAAAGGTTTCATTGCCTATTAATGTTATAGTTTTTGATGGTAAATCAAATGTGAAGAATC  
7861                7870                7880                7890                7900                7910  
7861 ATTTCCAAGTAACGGATAATTACAATATCAAAAACTACCATTTAGTTTTTACACTTCTTAG  
7921 ATCTGCAAAATCAGCGTCTGTTTACTACAGTCAGCTTATGTGTCAACCTATACTGTTACT  
7921                7930                7940                7950                7960                7970  
7921 TAGACGTTTTTAGTCGCAGACAAATGATGTCAGTCGAATACACAGTTGGATATGACAATGA  
7981 AGATCAGGCATTAGTGTCTGATGTTGGTGATAGTGCAGGAAAGTTGCAGTTAAATGTTTGA  
7981                7990                8000                8010                8020                8030  
7981 TCTAGTCCGTAATCACAGACTACAACCACTATCACGCCTTCAACGTCAATTTTACAACT  
8041 TGCTTACGTTAATACGTTTTTCATCAACTTTTAACGTACCAATGGAAAACTCAAACACT  
8041                8050                8060                8070                8080                8090  
8041 ACGAATGCAATTATGCAAAAGTAGTTGAAAATTGCATGGTTACCTTTTTGAGTTTTGTGA  
8101 AGTTGCAACTGCAGAAGCTGAACTTGCAAAGAATGTGTCCTTAGACAATGTCTTATCTAC  
8101                8110                8120                8130                8140                8150  
8101 TCAACGTTGACGTCTTCGACTTGAACGTTTCTTACACAGGAATCTGTTACAGAATAGATG  
8161 TTTTATTTTCAGCAGCTCGGCAAGGGTTTGTTGATTTCAGATGTAGAACTAAAGATGTTGT  
8161                8170                8180                8190                8200                8210  
8161 AAAATAAAGTCGTCGAGCCGTTCCCAAACAATAAGTCTACATCTTTGATTTCTACAACA  
8221 TGAATGTCTTAAATTGTCACATCAATCTGACATAGAAGTTACTGGCGATAGTTGTAATAA  
8221                8230                8240                8250                8260                8270  
8221 ACTTACAGAATTTAACAGTGTAGTTAGACTGTATCTTCAATGACCGCTATCAACATTATT  
8281 CTATATGCTCACCTATAACAAAGTTGAAAACATGACACCCCGTGACCTTGGTGCTTGAT  
8281                8290                8300                8310                8320                8330  
8281 GATATACGAGTGGATATTGTTTTCACTTTTGTACTGTGGGGCACTGGAACCACGAACATA  
8341 TGACTGTAGTGCAGCGTCATATTAATGCGCAGGTAGCAAAAAGTCACAACATTGCTTTGAT  
8341                8350                8360                8370                8380                8390  
8341 ACTGACATCACGCGCAGTATAATTACGCGTCCATCGTTTTTCAGTGTGTAAACGAACTA  
>>>21\_F>>> 8402 to 8424  
8401 ATGGAACGTTAAAGATTTTCATGTCTGCTGAACAACTACGAAAACAAATACGTAGTGC  
8401                8410                8420                8430                8440                8450  
8401 TACCTTGCAATTTCTAAAGTACAGTAACAGACTTGTTGATGCTTTTGTGTTATGCATCACG  
<<<22\_R<<< 8491 to 8513  
8461 TGCTAAAAAGAATAACTTACCTTTTAAAGTTGACATGTGCAACTACTAGACAAGTTGTTAA  
8461                8470                8480                8490                8500                8510  
8461 ACGATTTTTCTTATTGAATGGAAAATTCAACTGTACACGTTGATGATCTGTTCAACAATT  
8521 TGTTGTAACAACAAAGATAGCACTTAAGGGTGGTAAAATTGTTAATAATTGGTTGAAGCA  
8521                8530                8540                8550                8560                8570  
8521 ACAACATTGTTGTTTCTATCGTGAATTCCCACTTTTAAACAATTATTAACCAACTTCGT  
8581 GTTAATTAAAGTTACACTTGTGTTCCCTTTTTGTTGCTGCTATTTTCTATTTAATAACACC  
8581                8590                8600                8610                8620                8630  
8581 CAATTAATTTCAATGTGAACACAAGGAAAAACAACGACGATAAAAGATAAATTATTGTGG  
8641 TGTTTCATGTCATGCTAAACATACTGACTTTTCAAGTGAAATCATAGGATACAAGGCTAT  
8641                8650                8660                8670                8680                8690  
8641 ACAAGTACAGTACAGATTTGTATGACTGAAAAGTTCACTTTAGTATCCTATGTTCCGATA  
8701 TGATGGTGGTGTCACTCGTGACATAGCATCTACAGATACTTGTTTTGCTAACAACATGC  
8701                8710                8720                8730                8740                8750  
8701 ACTACCACCACAGTGAGCACTGTATCGTAGATGTCTATGAACAAAACGATTGTTTGTACG  
8761 TGATTTTGACACATGGTTTAGCCAGCGTGGTGGTAGTTATACTAATGACAAAGCTTGCCC  
8761                8770                8780                8790                8800                8810  
8761 ACTAAACTGTGTACCAAATCGGTCGCACCACCATCAATATGATTACTGTTTTCGAACGGG  
8821 ATTGATTGCTGCAGTCATAACAAGAGAAGTGGGTTTTGTCGTGCCTGGTTTGCCTGGCAC



|      |                                                                 |      |      |      |      |
|------|-----------------------------------------------------------------|------|------|------|------|
| 8821 | 8830                                                            | 8840 | 8850 | 8860 | 8870 |
| 8821 | TAACTAACGACGTCAGTATTGTTCTCTTCACCCAAAACAGCACGGACCAAACGGACCGTG    |      |      |      |      |
| 8881 | GATATTACGCACAACATAATGGTGACTTTTTTGCAATTTCTTACCTAGAGTTTTTAGTGCAGT |      |      |      |      |
| 8881 | 8890                                                            | 8900 | 8910 | 8920 | 8930 |
| 8881 | CTATAATGCGTGTTGATTACCACTGAAAAACGTAAAGAATGGATCTCAAAAATCACGTCA    |      |      |      |      |
| 8941 | TGGTAACATCTGTTACACACCATCAAACTTATAGAGTACACTGACTTTGCAACATCAGC     |      |      |      |      |
| 8941 | 8950                                                            | 8960 | 8970 | 8980 | 8990 |
| 8941 | ACCATTGTAGACAATGTGTGGTAGTTTTGAATATCTCATGTGACTGAAACGTTGTAGTCG    |      |      |      |      |
| 9001 | TTGTGTTTTGGCTGCTGAATGTACAATTTTTAAAGATGCTTCTGGTAAGCCAGTACCATA    |      |      |      |      |
| 9001 | 9010                                                            | 9020 | 9030 | 9040 | 9050 |
| 9001 | AACACAAAACCGACGACTTACATGTTAAAAATTTCTACGAAGACCATTTCGGTCATGGTAT   |      |      |      |      |
| 9061 | TTGTTATGATACCAATGTACTAGAAGGTTCTGTTGCTTATGAAAGTTTACGCCCTGACAC    |      |      |      |      |
| 9061 | 9070                                                            | 9080 | 9090 | 9100 | 9110 |
| 9061 | AACAATACTATGGTTACATGATCTTCCAAGACAACGAATACTTTCAAATGCGGGACTGTG    |      |      |      |      |
| 9121 | ACGTTATGTGCTCATGGATGGCTCTATTATTCAATTTCTTAACACCTACCTTGAAGGTTT    |      |      |      |      |
| 9121 | 9130                                                            | 9140 | 9150 | 9160 | 9170 |
| 9121 | TGCAATACACGAGTACCTACCGAGATAATAAGTTAAAGGATTGTGGATGGAACTTCCAAG    |      |      |      |      |
|      | >>>23_F>>> 9203 to 9224                                         |      |      |      |      |
| 9181 | TGTTAGAGTGGTAACAACCTTTTGATTCTGAGTACTGTAGGCACGGCACTTGTGAAAGATC   |      |      |      |      |
| 9181 | 9190                                                            | 9200 | 9210 | 9220 | 9230 |
| 9181 | ACAATCTCACCATTGTTGAAAACTAAGACTCATGACATCCGTGCCGTGAACACTTTCTAG    |      |      |      |      |
| 9241 | AGAAGCTGGTGTTTGTGTATCTACTAGTGGTAGATGGGTACTTAACAATGATTATTACAG    |      |      |      |      |
| 9241 | 9250                                                            | 9260 | 9270 | 9280 | 9290 |
| 9241 | TCTTCGACCACAAACACATAGATGATCACCATCTACCCATGAATTGTTACTAATAATGTC    |      |      |      |      |
|      | <<<24_R<<< 9319 to 9340                                         |      |      |      |      |
| 9301 | ATCTTTACCAGGAGTTTTCTGTGGTGTAGATGCTGTAAATTTACTTACTAATATGTTTAC    |      |      |      |      |
| 9301 | 9310                                                            | 9320 | 9330 | 9340 | 9350 |
| 9301 | TAGAAATGGTCCTCAAAAGACACCACATCTACGACATTTAAATGAATGATTATACAAATG    |      |      |      |      |
| 9361 | ACCACTAATTCAACCTATTGGTGCTTTGGACATATCAGCATCTATAGTAGCTGGTGGTAT    |      |      |      |      |
| 9361 | 9370                                                            | 9380 | 9390 | 9400 | 9410 |
| 9361 | TGGTGATTAAGTTGGATAACCACGAAACCTGTATAGTCGTAGATATCATCGACCACCATA    |      |      |      |      |
| 9421 | TGTAGCTATCGTAGTAACATGCCTTGCCTACTATTTTATGAGGTTTAGAAGAGCTTTTGG    |      |      |      |      |
| 9421 | 9430                                                            | 9440 | 9450 | 9460 | 9470 |
| 9421 | ACATCGATAGCATCATTGTACGGAACGGATGATAAAAATACTCCAAATCTTCTCGAAAACC   |      |      |      |      |
| 9481 | TGAATACAGTCATGTAGTTGCCTTTAATACTTTACTATTCCCTTATGTCATTCACTGTACT   |      |      |      |      |
| 9481 | 9490                                                            | 9500 | 9510 | 9520 | 9530 |
| 9481 | ACTTATGTCTAGTACATCAACGGAAATTATGAAATGATAAGGAATACAGTAAGTGACATGA   |      |      |      |      |
| 9541 | CTGTTTAAACACAGTTTACTCATTCTTACCTGGTGTTTATTCTGTTATTTACTTTGTACTT   |      |      |      |      |
| 9541 | 9550                                                            | 9560 | 9570 | 9580 | 9590 |
| 9541 | GACAAATTGTGGTCAAATGAGTAAGAATGGACCACAAATAAGACAATAAATGAACATGAA    |      |      |      |      |
| 9601 | GACATTTTATCTTACTAATGATGTTTCTTTTTTAGCACATATTCAGTGGATGGTTATGTT    |      |      |      |      |
| 9601 | 9610                                                            | 9620 | 9630 | 9640 | 9650 |
| 9601 | CTGTAAAATAGAATGATTACTACAAAGAAAAAATCGTGTATAAGTCACCTACCAATACAA    |      |      |      |      |
| 9661 | CACACCTTTAGTACCTTTCTGGATAACAATTGCTTATATCATTTGTATTTCCACAAAGCA    |      |      |      |      |
| 9661 | 9670                                                            | 9680 | 9690 | 9700 | 9710 |
| 9661 | GTGTGGAAATCATGGAAAGACCTATTGTTAACGAATATAGTAAACATAAAGGTGTTTCGT    |      |      |      |      |
| 9721 | TTTCTATTGGTTCTTTAGTAATTACCTAAAGAGACGTGTAGTCTTTAATGGTGTTCCTT     |      |      |      |      |
| 9721 | 9730                                                            | 9740 | 9750 | 9760 | 9770 |
| 9721 | AAAGATAACCAAGAAATCATTAATGGATTTCTCTGCACATCAGAAATTACCACAAAGGAA    |      |      |      |      |
| 9781 | TAGTACTTTTGAAGAAGCTGCGCTGTGCACCTTTTTGTAAATAAAGAAATGTATCTAAA     |      |      |      |      |
| 9781 | 9790                                                            | 9800 | 9810 | 9820 | 9830 |
| 9781 | ATCATGAAAACCTTCTTCGACGCGACACGTGGAAAAACAATTTATTTCTTTACATAGATTT   |      |      |      |      |
| 9841 | GTTGCGTAGTGATGTGCTATTACCTCTTACGCAATATAATAGATACTTAGCTCTTTATAA    |      |      |      |      |
| 9841 | 9850                                                            | 9860 | 9870 | 9880 | 9890 |
| 9841 | CAACGCATCACTACACGATAATGGAGAATGCGTTATATTATCTATGAATCGAGAAATATT    |      |      |      |      |
| 9901 | TAAGTACAAGTATTTTAGTGGAGCAATGGATACAACCTAGCTACAGAGAAGCTGCTTGTTG   |      |      |      |      |
| 9901 | 9910                                                            | 9920 | 9930 | 9940 | 9950 |
| 9901 | ATTCATGTTTCATAAAATCACCTCGTTACCTATGTTGATCGATGTCTCTTCGACGAACAAC   |      |      |      |      |
| 9961 | TCATCTCGCAAAGGCTCTCAATGACTTCAGTAACCTCAGGTTCTGATGTTCTTTACCAACC   |      |      |      |      |

```

9961          9970          9980          9990          10000          10010
9961 AGTAGAGCGTTTCCGAGAGTTACTGAAGTCATTGAGTCCAAGACTACAAGAAATGGTTGG
    >>>25_F>>> 10022 to 10043
10021 ACCACAAACCTCTATCACCTCAGCTGTTTTGCAGAGTGGTTTTAGAAAAATGGCATTCCC
10021          10030          10040          10050          10060          10070
10021 TGGTGTTTGGAGATAGTGGAGTCGACAAAACGTCTCACCAAAATCTTTTTACCGTAAGGG
    <<<26_R<<< 10133 to
10154
10081 ATCTGGTAAAGTTGAGGGTTGTATGGTACAAGTAACTTGTGGTACAACCTACACTTAACGG
10081          10090          10100          10110          10120          10130
10081 TAGACCATTTCAACTCCCAACATACCATGTTTCATTGAACACCATGTTGATGTGAATTGCC
10141 TCTTTGGCTTGATGACGTAGTTTACTGTCCAAGACATGTGATCTGCACCTCTGAAGACAT
10141          10150          10160          10170          10180          10190
10141 AGAAACCGAACTACTGCATCAAATGACAGGTTCTGTACACTAGACGTGGAGACTTCTGTGA
10201 GCTTAACCCTAATTATGAAGATTTACTCATTCGTAAGTCTAATCATAATTTCTTGGTACA
10201          10210          10220          10230          10240          10250
10201 CGAATTGGGATTAATACTTCTAAATGAGTAAGCATTTCAGATTAGTATTAAAGAACCATTGT
10261 GGCTGGTAATGTTCAACTCAGGGTTATTGGACATTCTATGCAAAATTGTGTACTTAAGCT
10261          10270          10280          10290          10300          10310
10261 CCGACCATTACAAGTTGAGTCCCAATAACCTGTAAGATACGTTTTAACACATGAATTCGA
10321 TAAGGTTGATACAGCCAATCCTAAGACACCTAAGTATAAGTTTGTTCGCATTCAACCAGG
10321          10330          10340          10350          10360          10370
10321 ATTCCAACCTATGTCGGTTAGGATTCTGTGGATTTCATATTCAAACAAGCGTAAGTTGGTCC
10381 ACAGACTTTTTTCAGTGTTAGCTTGTTCACATGGTTTACCATTCTGGTGTTTACCAATGTGC
10381          10390          10400          10410          10420          10430
10381 TGTCTGAAAAAGTCACAATCGAACAATGTTACCAAGTGGTAGACCACAAATGGTTACACG
10441 TATGAGGCCCAATTTCACTATTAAGGGTTCATTCCCTTAATGGTTCATGTGGTAGTGTGG
10441          10450          10460          10470          10480          10490
10441 ATACTCCGGGTTAAAGTGATAATTCCTCAAGTAAGGAATTACCAAGTACACCATCACAACC
10501 TTTTAACATAGATTATGACTGTGTCTCTTTTTGTTACATGCACCATATGGAATTACCAAC
10501          10510          10520          10530          10540          10550
10501 AAAATTGTATCTAATACTGACACAGAGAAAAACAATGTACGTGGTATACCTTAATGGTTG
10561 TGGAGTTCATGCTGGCACAGACTTAGAAGGTAACCTTTTATGGACCTTTTGTGACAGGCA
10561          10570          10580          10590          10600          10610
10561 ACCTCAAGTACGACCGTGTCTGAATCTTCCATTGAAAAATACCTGGAAAAACAACGTCCGT
10621 AACAGCACAAGCAGCTGGTACGGACACAACCTATTACAGTTAATGTTTTAGCTTGGTTGTA
10621          10630          10640          10650          10660          10670
10621 TTGTCGTGTTTCGTCGACCATGCCTGTGTGATAATGTCAATTACAAAATCGAACCAACAT
10681 CGCTGCTGTTATAAATGGAGACAGGTGGTTTCTCAATCGATTACCACAACCTCTTAATGA
10681          10690          10700          10710          10720          10730
10681 GCGACGACAATATTTACCTCTGTCCACCAAAAGAGTTAGCTAAATGGTGGTTGAGAATTACT
10741 CTTTAACCTTGTGGCTATGAAGTACAATTATGAACCTCTAACACAAGACCATGTTGACAT
10741          10750          10760          10770          10780          10790
10741 GAAATTGGAACACCGATACTTCATGTTAATACTTGAGATTGTGTTCTGGTACAACCTGTA
    >>>27_F>>> 10812 to 10833
10801 ACTAGGACCTCTTTCTGCTCAAACCTGGAATTGCCGTTTTAGATATGTGTGCTTCATTAAA
10801          10810          10820          10830          10840          10850
10801 TGATCCTGGAGAAAGACGAGTTTGACCTTAACGGCAAAATCTATACACACGAAGTAATTT
10861 AGAATTACTGCAAAATGGTATGAATGGACGTACCATATTGGGTAGTGCTTTATTAGAAGA
10861          10870          10880          10890          10900          10910
10861 TCTTAATGACGTTTTACCATACTTACCTGCATGGTATAACCCATCACGAAATAATCTTCT
    <<<28_R<<< 10949 to 10970
10921 TGAATTTACACCTTTTGATGTTGTTAGACAATGCTCAGGTGTTACTTTCCAAAGTGCAGT
10921          10930          10940          10950          10960          10970
10921 ACTTAAATGTGGAAACTACAACAATCTGTTACGAGTCCACAATGAAAGGTTTCACGTCA
10981 GAAAAGAACAATCAAGGTACACACCACTGGTTGTTACTCACAATTTTGACTTCACTTTT
10981          10990          11000          11010          11020          11030
10981 CTTTTCTTGTTAGTTCCCATGTGTGGTGACCAACAATGAGTGTTAAACTGAAGTGAAAA
11041 AGTTTTAGTCCAGAGTACTCAATGGTCTTTGTTCTTTTTTTTTGTATGAAAATGCCTTTTT

```

```

11041      11050      11060      11070      11080      11090
11041 TCAAAATCAGGTCTCATGAGTTACCAGAAAACAAGAAAAAACATACTTTTACGGAAAAA
11101 ACCTTTTGCTATGGGTATTATTGCTATGTCTGCTTTTGCAATGATGTTTGTCAAACATAA
11101      11110      11120      11130      11140      11150
11101 TGGAAAACGATACCCATAATAACGATACAGACGAAAACGTTACTACAAACAGTTTGTATT
11161 GCATGCATTTCTCTGTTTGTGTTTTGTACCTTCTCTTGCCACTGTAGCTTATTTTAATAT
11161      11170      11180      11190      11200      11210
11161 CGTACGTAAAGAGACAAACAAAAACAATGGAAGAGAACGGTGACATCGAATAAAATTATA
11221 GGTCTATATGCCTGCTAGTTGGGTGATGCGTATTATGACATGGTTGGATATGGTTGATAC
11221      11230      11240      11250      11260      11270
11221 CCAGATATACGGACGATCAACCCACTACGCATAATACTGTACCAACCTATACCAACTATG
11281 TAGTTTGTCTGGTTTTTAAGCTAAAAGACTGTGTTATGTATGCATCAGCTGTAGTGTTACT
11281      11290      11300      11310      11320      11330
11281 ATCAACAGACCAAAATTCGATTTTCTGACACAATACATACGTAGTCGACATCACAATGA
11341 AATCCTTATGACAGCAAGAAGCTGTATGATGATGGTGCTAGGAGAGTGTGGCACTTAT
11341      11350      11360      11370      11380      11390
11341 TTAGGAATACTGTCGTTCTTGACACATACTACTACCACGATCCTCTCACACCTGTGAATA
11401 GAATGTCTTGACACTCGTTTATAAAGTTTATTATGGTAATGCTTTAGATCAAGCCATTTTC
11401      11410      11420      11430      11440      11450
11401 CTTACAGAAGTGTGAGCAAATATTTCAAATAATACCATTACGAAATCTAGTTCGGTAAAG
11461 CATGTGGGCTCTTATAATCTCTGTTACTTCTAACTACTCAGGTGTAGTTACAAGTGTGAT
11461      11470      11480      11490      11500      11510
11461 GTACACCCGAGAATATTAGAGACAAATGAAGATTGATGAGTCCACATCAATGTTGACAGTA
11521 GTTTTTGGCCAGAGGTATTGTTTTTATGTGTGTTGAGTATTGCCCTATTTTCTTCATAAC
11521      11530      11540      11550      11560      11570
11521 CAAAAACCGGTCTCCATAACAAAAATACACACAACTCATAACGGGATAAAAAGAAGTATTG
11581 TGGTAATACACTTCAGTGTATAATGCTAGTTTATTGTTTCTTAGGCTATTTTTGTACTTG
11581      11590      11600      11610      11620      11630
11581 ACCATTATGTGAAGTCACATATTACGATCAAATAACAAAGAATCCGATAAAAACATGAAC
      >>>29_F>>> 11664 to 11685
11641 TTACTTTGGCCTCTTTTGTGTTACTCAACCGCTACTTTAGACTGACTCTTGGTGTTTATGA
11641      11650      11660      11670      11680      11690
11641 AATGAAACCGGAGAAAACAAATGAGTTGGCGATGAAATCTGACTGAGAACCACAAATACT
11701 TTACTTAGTTTCTACACAGGAGTTTAGATATATGAATTCACAGGGACTACTCCACCCAA
11701      11710      11720      11730      11740      11750
11701 AATGAATCAAAGATGTGTCCTCAAATCTATATACTTAAGTGTCCTGATGAGGGTGGGTT
      <<<30_R<<< 11767 to 11789
11761 GAATAGCATAGATGCCTTCAAACCTCAACATTAAATTTGTTGGGTGTTGGTGGCAAACCTTG
11761      11770      11780      11790      11800      11810
11761 CTTATCGTATCTACGGAAGTTTGAGTTGTAATTTAACAACCCACAACCACCGTTTGGAAC
11821 TATCAAAGTAGCCACTGTACAGTCTAAAAATGTCAGATGTAAAGTGCACATCAGTAGTCTT
11821      11830      11840      11850      11860      11870
11821 ATAGTTTCATCGGTGACATGTCAGATTTTACAGTCTACATTTACGTGTAGTCATCAGAA
11881 ACTCTCAGTTTTTGCAACAACCTCAGAGTAGAATCATCATCTAAATTGTGGGCTCAATGTGT
11881      11890      11900      11910      11920      11930
11881 TGAGAGTCAAAACGTTGTTGAGTCTCATCTTAGTAGTAGATTTAACACCCGAGTTACACA
11941 CCAGTTACACAATGACATTCTCTTAGCTAAAGATACTACTGAAGCCTTTGAAAAAATGGT
11941      11950      11960      11970      11980      11990
11941 GGTCAATGTGTTACTGTAAGAGAATCGATTTCTATGATGACTTCGGAAACTTTTTTACCA
12001 TTCCTACTTTCTGTTTTGCTTTCCATGCAGGGTGCTGTAGACATAAACAAGCTTTGTGA
12001      12010      12020      12030      12040      12050
12001 AAGTGATGAAAGACAAAACGAAAGGTACGTCCCACGACATCTGTATTTGTTTCGAAACACT
12061 AGAAATGCTGGACAACAGGGCAACCTTACAAGCTATAGCCTCAGAGTTTAGTTCCCTTCC
12061      12070      12080      12090      12100      12110
12061 TCTTTACGACCTGTTGTCCCCTTGAATGTTTCGATATCGGAGTCTCAAATCAAGGGAAGG
12121 ATCATATGCAGCTTTTGTACTGCTCAAGAAGCTTATGAGCAGGCTGTTGCTAATGGTGA
12121      12130      12140      12150      12160      12170
12121 TAGTATACGTCGAAAACGATGACGAGTTCTTCGAATACTCGTCCGACAACGATTACCACT
12181 TTCTGAAGTTGTTCTTAAAAAGTTGAAGAAGTCTTTGAATGTGGCTAAATCTGAATTTGA

```

```

12181      12190      12200      12210      12220      12230
12181 AAGACTTCAACAAGAATTTTTCAACTTCTTCAGAACTTACACCGATTTAGACTTAACT
12241 CCGTGATGCAGCCATGCAACGTAAGTTGGAAAAGATGGCTGATCAAGCTATGACCCAAAT
12241      12250      12260      12270      12280      12290
12241 GGCCTACGTCGGTACGTTGCATTCAACCTTTTCTACCGACTAGTTCGATACTGGGTTTA
12301 GTATAAACAGGCTAGATCTGAGGACAAGAGGGCAAAAGTTACTAGTGCTATGCAGACAAT
12301      12310      12320      12330      12340      12350
12301 CATATTTGTCCGATCTAGACTCCTGTTCTCCCGTTTCAATGATCACGATACGTCTGTTA
12361 GCTTTTCACTATGCTTAGAAAGTTGGATAATGATGCACTCAACAACATTATCAACAATGC
12361      12370      12380      12390      12400      12410
12361 CGAAAAGTGATACGAATCTTTCAACCTATTACTACGTGAGTTGTTGTAATAGTTGTTACG
      >>>31_F>>> 12448 to 12469
12421 AAGAGATGGTTGTGTTCCCTTGAACATAATACCTCTTACAACAGCAGCCAACTAATGGT
12421      12430      12440      12450      12460      12470
12421 TTCTCTACCAACACAAGGGAACTTGTATTATGGAGAATGTTGTCGTCGGTTTGATTACCA
12481 TGTCAACCAGACTATAACACATATAAAAATACGTGTGATGGTACAACATTTACTTATGC
12481      12490      12500      12510      12520      12530
12481 ACAGTATGGTCTGATATTGTGTATATTTTTATGCACACTACCATGTTGTAAATGAATACG
12541 ATCAGCATTGTGGGAAATCCAACAGGTTGTAGATGCAGATAGTAAATTTGTTCAACTTAG
12541      12550      12560      12570      12580      12590
12541 TAGTCGTAACACCCTTTAGGTTGTCCAACATCTACGTCTATCATTTTAACAAGTTGAATC
12601 TGAAATTAGTATGGACAATTCACCTAATTTAGCATGGCCTCTTATTGTAACAGCTTTAAG
12601      12610      12620      12630      12640      12650
12601 ACTTTAATCATACCTGTTAAGTGGATTAAATCGTACCGGAGAATAACATTGTGCAAAATTC
      <<<32_R<<< 12661 to 12682
12661 GGCCAATTCTGCTGTCAAATTACAGAATAATGAGCTTAGTCCTGTTGCACTACGACAGAT
12661      12670      12680      12690      12700      12710
12661 CCGGTTAAGACGACAGTTTAAATGTCTTATTACTCGAATCAGGACAACGTGATGCTGTCTA
12721 GTCTTGTGCTGCCGGTACTACACAACTGCTTGCACTGATGACAATGCGTTAGCTTACTA
12721      12730      12740      12750      12760      12770
12721 CAGAACACGACGGCCATGATGTGTTTGACGAACGTGACTACTGTTACGCAATCGAATGAT
12781 CAACACAACAAAGGGAGGTAGGTTTGTACTTGCACTGTTATCCGATTTACAGGATTTGAA
12781      12790      12800      12810      12820      12830
12781 GTTGTGTTGTTTCCCTCCATCCAAACATGAACGTGACAATAGGCTAAATGTCCTAAACTT
12841 ATGGGCTAGATTCCTAAGAGTGATGGAACCTGGTACTATCTATACAGAACTGGAACCACC
12841      12850      12860      12870      12880      12890
12841 TACCCGATCTAAGGGATTCTCACTACCTTGACCATGATAGATATGTCTTGACCTTGGTGG
12901 TTGTAGGTTTGTACAGACACACCTAAAGGTCCTAAAGTGAAGTATTTATACTTTATTAA
12901      12910      12920      12930      12940      12950
12901 AACATCCAAACAATGTCTGTGTGGATTTCAGGATTTCACTTCATAAATATGAAATAATT
12961 AGGATTAAACAACCTAAATAGAGGTATGGTACTTGGTAGTTTAGCTGCCACAGTACGTCT
12961      12970      12980      12990      13000      13010
12961 TCCTAATTTGTTGGATTTATCTCCATACCATGAACCATCAAATCGACGGTGTGCATGCAGA
13021 ACAAGCTGGTAATGCAACAGAAGTGCCTGCCAATTCAACTGTATTATCTTTCTGTGCTTT
13021      13030      13040      13050      13060      13070
13021 TGTTTCGACCATTACGTTGTCTTCACGGACGGTTAAGTTGACATAATAGAAAGACACGAAA
13081 TGCTGTAGATGCTGCTAAAGCTTACAAAGATTATCTAGCTAGTGGGGACAACCAATCAC
13081      13090      13100      13110      13120      13130
13081 ACGACATCTACGACGATTTTCAATGTTTCTAATAGATCGATCACCCCCTGTTGGTTAGTG
13141 TAATTGTGTTAAGATGTTGTGTACACACTGGTACTGGTCAGGCAATAACAGTTACACC
13141      13150      13160      13170      13180      13190
13141 ATTAACACAATTCTACAACACATGTGTGTGACCATGACCAGTCCGTTATTGTCAATGTGG
13201 GGAAGCCAATATGGATCAAGAATCCTTTGGTGGTGCATCGTGTGTCTGTACTGCCGTTG
13201      13210      13220      13230      13240      13250
13201 CCTTCGGTTATACCTAGTTCTTAGGAAACCACCACGTAGCACAACAGACATGACGGCAAC
13261 CCACATAGATCATCAAATCCTAAAGATTTTGTGACTTAAAGGTAAGTATGTACAAAT
13261      13270      13280      13290      13300      13310
13261 GGTGTATCTAGTAGGTTTAGGATTTCTAAAACACTGAATTTTCCATTTCATACATGTTTA
      >>>33_F>>> 13327 to 13348

```

13321 ACCTACAACCTGTGCTAATGACCCTGTGGGTTTTACACTTAAAAACACAGTCTGTACCGT  
13321 13330 13340 13350 13360 13370  
13321 TGGATGTTGAACACGATTACTGGGACACCCAAAATGTGAATTTTTGTGTCAGACATGGCA  
13381 CTGCGGTATGTGGAAAGGTTATGGCTGTAGTTGTGATCAACTCCGCGAACCCATGCTTCA  
13381 13390 13400 13410 13420 13430  
13381 GACGCCATACACCTTTCCAATACCGACATCAACACTAGTTGAGGCGCTTGGGTACGAAGT  
<<<34\_R<<< 13478 to 13498  
13441 GTCAGCTGATGCACAATCGTTTTTAAACGGGTTTGCGGTGTAAGTGCAGCCCGTCTTACA  
13441 13450 13460 13470 13480 13490  
13441 CAGTCGACTACGTGTTAGCAAAAATTTGCCCAAACGCCACATTCACGTGCGGCAGAATGT  
13501 CCGTGCGGCACAGGCACCTAGTACTGATGTCGTATACAGGGCTTTTGACATCTACAATGAT  
13501 13510 13520 13530 13540 13550  
13501 GGCACGCCGTGTCCGTGATCATGACTACAGCATATGTCCCGAAAACGTGTAGATGTTACTA  
13561 AAAGTAGCTGGTTTTGCTAAATTCCTAAAACTAATTGTTGTCGCTTCCAAGAAAAGGAC  
13561 13570 13580 13590 13600 13610  
13561 TTTCATCGACCAAAACGATTTAAGGATTTTTGATTAAACAACAGCGAAGGTTCTTTTCCTG  
13621 GAAGATGACAATTTAATTGATTCTTACTTTGTAGTTAAGAGACACACTTTCTCTAACTAC  
13621 13630 13640 13650 13660 13670  
13621 CTTCTACTGTTAAATTAACATAAGAATGAAACATCAATTCTCTGTGTGAAAGAGATTGATG  
13681 CAACATGAAGAAACAATTTATAATTTACTTAAGGATTGTCCAGCTGTTGCTAAACATGAC  
13681 13690 13700 13710 13720 13730  
13681 GTTGTACTTCTTTGTTAAATATTAAATGAATTCCTAACAGGTCGACAACGATTTGTACTG  
13741 TTCTTTAAGTTTAGAATAGACGGTGACATGGTACCACATATATCACGTCAACGTCTTACT  
13741 13750 13760 13770 13780 13790  
13741 AAGAAATTCAAATCTTATCTGCCACTGTACCATGGTGTATATAGTGCAGTTGCAGAATGA  
13801 AAATACACAATGGCAGACCTCGTCTATGCTTTAAGGCATTTTGATGAAGGTAATTGTGAC  
13801 13810 13820 13830 13840 13850  
13801 TTTATGTGTTACCGTCTGGAGCAGATACGAAATTCGGTAAAACACTTCCATTAACACTG  
13861 ACATTAAAAGAAATACTTGTACATACAATTGTTGTGATGATGATTATTTCAATAAAAAG  
13861 13870 13880 13890 13900 13910  
13861 TGTAATTTTCTTTATGAACAGTGTATGTTAACAACACTACTACTAATAAAGTTATTTTTC  
13921 GACTGGTATGATTTTGTAGAAAACCCAGATATATTACGCGTATACGCCAACTTAGGTGAA  
13921 13930 13940 13950 13960 13970  
13921 CTGACCATACTAAAACATCTTTTGGGTCTATATAATGCGCATATGCGGTTGAATCCACTT  
13981 CGTGTACGCCAAGCTTTGTTAAAAACAGTACAATTCTGTGATGCCATGCGAAATGCTGGT  
13981 13990 14000 14010 14020 14030  
13981 GCACATGCGGTTTCGAAACAATTTTTGTCATGTTAAGACACTACGGTACGCTTTACGACCA  
14041 ATTTGTTGGTGTACTGACATTAGATAATCAAGATCTCAATGGTAACTGGTATGATTTCCGT  
14041 14050 14060 14070 14080 14090  
14041 TAACAACCACATGACTGTAATCTATTAGTTCTAGAGTTACCATTGACCATACTAAAGCCA  
14101 GATTTTCATACAAACCACGCCAGGTAGTGGAGTTCCTGTTGTAGATTCTTATTATTCATTG  
14101 14110 14120 14130 14140 14150  
14101 CTAAAGTATGTTTGGTGCGGTCCATCACCTCAAGGACAACATCTAAGAATAATAAGTAAC  
>>>35\_F>>> 14210 to 14231  
14161 TTAATGCCTATATTAACCTTGACCAGGGCTTTAACTGCAGAGTCACATGTTGACACTGAC  
14161 14170 14180 14190 14200 14210  
14161 AATTACGGATATAATTGGAACGGTCCCGAAATTGACGTCTCAGTGTACAACTGTGACTG  
14221 TTAACAAAGCCTTACATTAAGTGGGATTTGTTAAAAATAGACTTCACGGAAGAGAGGTTA  
14221 14230 14240 14250 14260 14270  
14221 AATTGTTTCGGAATGTAATTCACCCTAAACAATTTTATACTGAAGTGCCTTCTCTCCAAT  
<<<36\_R<<< 14310 to 14331  
14281 AAACCTCTTTGACCGTTATTTTAAATATTGGGATCAGACATACCACCCAAATTGTGTTAAC  
14281 14290 14300 14310 14320 14330  
14281 TTTGAGAACTGGCAATAAAATTTATAACCCCTAGTCTGTATGGTGGGTTTAACACAATTG  
14341 TGTTTGGATGACAGATGCATTCTGCATTGTGCAAACCTTAATGTTTTATTCTCTACAGTG  
14341 14350 14360 14370 14380 14390  
14341 ACAAACCTACTGTCTACGTAAGACGTAACACGTTTGAAATTACAAAATAAGAGATGTCAC  
14401 TTCCACCTACAAGTTTTGGACCACTAGTGAGAAAAATATTTGTTGATGGTGTTCATTT  
14401 14410 14420 14430 14440 14450

14401 AAGGGTGGATGTTCAAACCTGGTGATCACTCTTTTTATAAAACAACTACCACAAGGTAAA  
14461 GTAGTTTCAACTGGATACCCTTCAGAGAGCTAGGTGTTGTACATAATCAGGATGTAAAC  
14461 14470 14480 14490 14500 14510  
14461 CATCAAAGTTGACCTATGGTGAAGTCTCTCGATCCACAACATGTATTAGTCCTACATTTG  
14521 TTACATAGCTCTAGACTTAGTTTTAAAGGAATTACTTGTGTATGCTGCTGACCCTGCTATG  
14521 14530 14540 14550 14560 14570  
14521 AATGTATCGAGATCTGAATCAAATTCCTTAATGAACACATACGACGACTGGGACGATAC  
14581 CACGCTGCTTCTGGTAATCTATTACTAGATAAACGCACTACGTGCTTTTCAGTAGCTGCA  
14581 14590 14600 14610 14620 14630  
14581 GTGCGACGAAGACCATTAGATAATGATCTATTTGCGTGATGCACGAAAAGTCATCGACGT  
14641 CTTACTAACAATGTTGCTTTTCAAACCTGTCAAACCCGGTAATTTTAAACAAAGACTTCTAT  
14641 14650 14660 14670 14680 14690  
14641 GAATGATTGTTACAACGAAAAGTTTGACAGTTTGGGCCATTAAAATTGTTTCTGAAGATA  
14701 GACTTTGCTGTGCTAAGGGTTTCTTTAAGGAAGGAAGTTCTGTTGAATTAACAACTTC  
14701 14710 14720 14730 14740 14750  
14701 CTGAAACGACACAGATTCCCAAAGAAATTCCTTCCTTCAAGACAACCTTAATTTTGTGAAG  
14761 TTCTTTGCTCAGGATGGTAATGCTGCTATCAGCGATTATGACTACTATCGTTATAATCTA  
14761 14770 14780 14790 14800 14810  
14761 AAGAAACGAGTCCTACCATTACGACGATAGTCGCTAATACTGATGATAGCAATATTAGAT  
14821 CCAACAATGTGTGATATCAGACAACACTACTATTTGTAGTTGAAGTTGTTGATAAGTACTTT  
14821 14830 14840 14850 14860 14870  
14821 GGTGTGTACACACTATAGTCTGTTGATGATAAACATCAACTTCAACAACCTATTCATGAAA  
14881 GATTGTTACGATGGTGGCTGTATTAATGCTAACCAAGTCATCGTCAACAACCTAGACAAA  
14881 14890 14900 14910 14920 14930  
14881 CTAACAATGCTACCACCGACATAATTACGATTGGTTCAGTAGCAGTTGTTGGATCTGTTT  
14941 TCAGCTGGTTTTCCATTTAATAAATGGGGTAAGGCTAGACTTTATTATGATTCAATGAGT  
14941 14950 14960 14970 14980 14990  
14941 AGTCGACCAAAAGGTAAATTATTTACCCCATTCGGATCTGAAATAATACTAAGTTACTCA  
>>>37\_F>>> 15036 to 15061  
15001 TATGAGGATCAAGATGCACTTTTTCGCATATACAAAACGTAATGTCATCCCTACTATAACT  
15001 15010 15020 15030 15040 15050  
15001 ATACTCCTAGTTCTACGTGAAAAGCGTATATGTTTTGCATTACAGTAGGGATGATATTGA  
15061 CAAATGAATCTTAAGTATGCCATTAGTGCAAAGAATAGAGCTCGCACCGTAGCTGGTGTCT  
15061 15070 15080 15090 15100 15110  
15061 GTTTACTTAGAATTCATACGGTAATCACGTTTCTTATCTCGAGCGTGGCATCGACCACAG  
15121 TCTATCTGTAGTACTATGACCAATAGACAGTTTCATCAAAAATTATTGAAATCAATAGCC  
15121 15130 15140 15150 15160 15170  
15121 AGATAGACATCATGATACTGGTTATCTGTCAAAGTAGTTTTTAATAACTTTAGTTATCGG  
<<<38\_R<<< 15197 to 15219  
15181 GCCACTAGAGGAGCTACTGTAGTAATTGGAACAAGCAAATTCTATGGTGGTTGGCACAAC  
15181 15190 15200 15210 15220 15230  
15181 CGGTGATCTCCTCGATGACATCATTAACCTTGTTTCGTTTAAAGATACCACCAACCGTGTTG  
15241 ATGTTAAAACTGTTTATAGTGATGTAGAAAACCCCTACCTTATGGGTTGGGATTATCCT  
15241 15250 15260 15270 15280 15290  
15241 TACAATTTTTGACAAATATCACTACATCTTTTGGGAGTGGAATACCCAACCCTAATAGGA  
15301 AAATGTGATAGAGCCATGCCTAACATGCTTAGAATTATGGCCTCACTTGTTCCTTGCTCGC  
15301 15310 15320 15330 15340 15350  
15301 TTTACACTATCTCGGTACGGATTGTACGAATCTTAATACCGGAGTGAACAAGAACGAGCG  
15361 AAACATACAACGTGTTGTAGCTTGTACACCGTTTCTATAGATTAGCTAATGAGTGTGCT  
15361 15370 15380 15390 15400 15410  
15361 TTTGTATGTTGCACAACATCGAACAGTGTGGCAAAGATATCTAATCGATTACTCACACGA  
15421 CAAGTATTGAGTGAAATGGTCATGTGTGGCGGTTCACTATATGTTAAACCAGGTGGAACC  
15421 15430 15440 15450 15460 15470  
15421 GTTCATAACTCACTTTACCAGTACACACCGCCAAGTGATATACAATTTGGTCCACCTTGG  
15481 TCATCAGGAGATGCCACAACCTGCTTATGCTAATAGTGTTTTTAACATTTGTCAAGCTGTC  
15481 15490 15500 15510 15520 15530  
15481 AGTAGTCCTCTACGGTGTGACGAATACGATTATCACAAAAATTGTAAACAGTTCGACAG  
15541 ACGGCCAATGTTAATGCACTTTTATCTACTGATGGTAACAAAATTGCCGATAAGTATGTC  
15541 15550 15560 15570 15580 15590

15541 TGCCGGTTACAATTACGTGAAAATAGATGACTACCATTGTTTTAACGGCTATTTCATACAG  
15601 CGCAATTTACAACACAGACTTTATGAGTGTCTCTATAGAAAATAGAGATGTTGACACAGAC  
15601 15610 15620 15630 15640 15650  
15601 GCGTTAAATGTTGTGTCTGAAATACTCACAGAGATATCTTTATCTCTACAACGTGTCTG  
15661 TTTGTGAATGAGTTTTACGCATATTTGCGTAAACATTTCTCAATGATGATACTCTCTGAC  
15661 15670 15680 15690 15700 15710  
15661 AAACACTTACTCAAAATGCGTATAAACGCATTTGTAAAGAGTTACTACTATGAGAGACTG  
15721 GATGCTGTTGTGTGTTTCAATAGCACTTATGCATCTCAAGGTCTAGTGGCTAGCATAAAG  
15721 15730 15740 15750 15760 15770  
15721 CTACGACAACACACAAAGTTATCGTGAATACGTAGAGTTCCAGATCACCGATCGTATTTT  
15781 AACTTTAAGTCAGTTCTTTATTATCAAAACAATGTTTTTATGTCTGAAGCAAAATGTTGG  
15781 15790 15800 15810 15820 15830  
15781 TTGAAATTCAGTCAAGAAATAATAGTTTTGTACAAAAATACAGACTTCGTTTTACAACC  
15841 ACTGAGACTGACCTTACTAAAGGACCTCATGAATTTTGCTCTCAACATAACAATGCTAGTT  
15841 15850 15860 15870 15880 15890  
15841 TGA CTCTGACTGGAATGATTTCTGGAGTACTTAAACGAGAGTTGTATGTTACGATCAA  
>>>39\_F>>> 15919 to 15940  
15901 AAACAGGGTGATGATTATGTGTACCTTCCTTACCCAGATCCATCAAGAATCCTAGGGGCC  
15901 15910 15920 15930 15940 15950  
15901 TTTGTCCCCTACTAATACACATGGAAGGAATGGGTCTAGGTAGTTCTTAGGATCCCCGG  
15961 GGCTGTTTTGTAGATGATATCGTAAAAACAGATGGTACACTTATGATTGAACGGTTCGTG  
15961 15970 15980 15990 16000 16010  
15961 CCGACAAAACATCTACTATAGCATTTTTGTCTACCATGTGAATACTAACTTGCCAAGCAC  
<<<40\_R<<< 16063 to 16085  
16021 TCTTTAGCTATAGATGCTTACCCACTTACTAAACATCCTAATCAGGAGTATGCTGATGTC  
16021 16030 16040 16050 16060 16070  
16021 AGAAATCGATATCTACGAATGGGTGAATGATTTGTAGGATTAGTCCTCATACGACTACAG  
16081 TTTTCATTTGTACTTACAATACATAAGAAAGCTACATGATGAGTTAACAGGACACATGTTA  
16081 16090 16100 16110 16120 16130  
16081 AAAGTAAACATGAATGTTATGTATTCTTTTCGATGTACTACTCAATTGTCCTGTGTACAAT  
16141 GACATGTATTCTGTTATGCTTACTAATGATAACACTTCAAGGTATTGGGAACCTGAGTTT  
16141 16150 16160 16170 16180 16190  
16141 CTGTACATAAGACAATACGAATGATTACTATTGTGAAGTTCCATAACCCTTGGACTCAAA  
16201 TATGAGGCTATGTACACACCGCATACAGTCTTACAGGCTGTTGGGGCTTGTGTTCTTTGC  
16201 16210 16220 16230 16240 16250  
16201 ATACTCCGATACATGTGTGGCGTATGTCAGAATGTCCGACAACCCGAACACAAGAAACG  
16261 AATTCACAGACTTCATTAAGATGTGGTGCTTGCATACGTAGACCATTCTTATGTTGTAAA  
16261 16270 16280 16290 16300 16310  
16261 TTAAGTGTCTGAAGTAATTCTACACCAGAACGTATGCATCTGGTAAGAATACAACATTT  
16321 TGCTGTTACGACCATGTCATATCAACATCACATAAAATTAGTCTTGTCTGTTAATCCGTAT  
16321 16330 16340 16350 16360 16370  
16321 ACGACAATGCTGGTACAGTATAGTTGTAGTGTATTTAATCAGAACAGACAATTAGGCATA  
16381 GTTTGCAATGCTCCAGGTTGTGATGTCACAGATGTGACTCAACTTTACTTAGGAGGTATG  
16381 16390 16400 16410 16420 16430  
16381 CAAACGTTACGAGGTCCAACACTACAGTGCTTACACTGAGTTGAAATGAATCCTCCATAC  
16441 AGCTATTATTGTAAATCACATAAACCCACCATTAGTTTTCCATTGTGTGCTAATGGACAA  
16441 16450 16460 16470 16480 16490  
16441 TCGATAATAACATTTAGTGTATTTGGTGGGTAATCAAAAGGTAACACACGATTACCTGTT  
16501 GTTTTTGGTTTATATAAAAATACATGTGTTGGTAGCGATAATGTTACTGACTTTAATGCA  
16501 16510 16520 16530 16540 16550  
16501 CAAAAACCAAATATATTTTTATGTACACAACCATCGCTATTACAATGACTGAAATTACGT  
16561 ATTGCAACATGTGACTGGACAAATGCTGGTGATTACATTTTAGCTAACACCTGTACTGAA  
16561 16570 16580 16590 16600 16610  
16561 TAACGTTGTACACTGACCTGTTTACGACCACTAATGTAAATCGATTGTGGACATGACTT  
16621 AGACTCAAGCTTTTTGCAGCAGAAACGCTCAAAGCTACTGAGGAGACATTTAACTGTCT  
16621 16630 16640 16650 16660 16670  
16621 TCTGAGTTCGAAAAACGTCGTCTTTGCGAGTTTCGATGACTCCTCTGTAAATTTGACAGA  
16681 TATGGTATTGCTACTGTACGTGAAGTGCTGTCTGACAGAGAATTACATCTTTCATGGGAA  
16681 16690 16700 16710 16720 16730

16681 ATACCATAACGATGACATGCACTTCACGACAGACTGTCTCTTAATGTAGAAAGTACCCTT  
16741 GTTGGTAAACCTAGACCACCACTTAACCGAAATTATGTCTTTACTGGTTATCGTGTAAC  
16741 16750 16760 16770 16780 16790  
16741 CAACCATTTGGATCTGGTGGTGAATTGGCTTTAATACAGAAATGACCAATAGCACATTGA  
>>>41\_F>>> 16848 to 16870  
16801 AAAAACAGTAAAGTACAAATAGGAGAGTACACCTTTGAAAAAGGTGACTATGGTGATGCT  
16801 16810 16820 16830 16840 16850  
16801 TTTTTGTCATTTTCATGTTTATCCTCTCATGTGGAACCTTTTCCACTGATACCACTACGA  
16861 GTTGTTTACCGAGGTACAACAACCTTACAAATTAAATGTTGGTGATTATTTTGTGCTGACA  
16861 16870 16880 16890 16900 16910  
16861 CAACAAATGGCTCCATGTTGTTGAATGTTTAAATTTACAACCACTAATAAAACACGACTGT  
<<<42\_R<<< 16959 to 16980  
16921 TCACATACAGTAATGCCATTAAGTGCACCTACACTAGTGCCACAAGAGCACTATGTTAGA  
16921 16930 16940 16950 16960 16970  
16921 AGTGTATGTCATTACGGTAATTCACGTGGATGTGATCACGGTGTTCTCGTGATAACAATCT  
16981 ATTACTGGCTTATACCCAACACTCAATATCTCAGATGAGTTTTCTAGCAATGTTGCAAT  
16981 16990 17000 17010 17020 17030  
16981 TAATGACCGAATATGGGTTGTGAGTTATAGAGTCTACTCAAAAGATCGTTACAACGTTTAA  
17041 TATCAAAAGGTTGGTATGCAAAAGTATTCTACACTCCAGGGACCACCTGGTACTGGTAAG  
17041 17050 17060 17070 17080 17090  
17041 ATAGTTTTTCCAACCATACGTTTTTCATAAGATGTGAGGTCCCTGGTGGACCATGACCATTCT  
17101 AGTCATTTTGTCTATTGGCCTAGCTCTCTACTACCTTCTGCTCGCATAGTGTATACAGCT  
17101 17110 17120 17130 17140 17150  
17101 TCAGTAAAACGATAACCGGATCGAGAGATGATGGGAAGACGAGCGTATCACATATGTGCA  
17161 TGCTCTCATGCCGCTGTTGATGCACATATGTGAGAAGGCATTAAATATTTGCCTATAGAT  
17161 17170 17180 17190 17200 17210  
17161 ACGAGAGTACGGCGACAACCTACGTGATACACTCTTCCGTAATTTTATAAACGGATATCTA  
17221 AAATGTAGTAGAATTATACCTGCACGTGCTCGTGATAGAGTGTGTTTGATAAATTCAAAGTG  
17221 17230 17240 17250 17260 17270  
17221 TTTACATCATCTTAATATGGACGTGCACGAGCACATCTCACAAAACCTATTTAAGTTTCAC  
17281 AATTCAACATTAGAACAGTATGTCTTTTGTACTGTAAATGCATTGCCTGAGACGACAGCA  
17281 17290 17300 17310 17320 17330  
17281 TTAAGTTGTAATCTTGTGCATACAGAAAACATGACATTTACGTAACGGACTCTGCTGTCTGT  
17341 GATATAGTTGTCTTTGATGAAATTTCAATGGCCACAAATTATGATTTGAGTGTTGTCAAT  
17341 17350 17360 17370 17380 17390  
17341 CTATATCAACAGAACTACTTTAAAGTTACCGGTGTTTAAATACTAAACTCACAACAGTTA  
17401 GCCAGATTACGTGCTAAGCACTATGTGTACATTGGCGACCCTGCTCAATTACCTGCACCA  
17401 17410 17420 17430 17440 17450  
17401 CGGTCTAATGCACGATTTCGTGATACACATGTAACCGCTGGGACGAGTTAATGGACGTGGT  
17461 CGCACATTGCTAATAAGGGCACACTAGAACCAGAATATTTCAATTCAAGTGTGTAGACTT  
17461 17470 17480 17490 17500 17510  
17461 GCGTGTAACGATTGATTCCCGTGTGATCTTGGTCTTATAAAGTTAAGTCACACATCTGAA  
17521 ATGAAAACCTATAGGTCCAGACATGTTCCCTCGGAACCTGTGCGCGTTGTCCTGCTGAAATT  
17521 17530 17540 17550 17560 17570  
17521 TACTTTTGATATCCAGGTCTGTACAAGGAGCCTTGAACAGCCGCAACAGGACGACTTTAA  
17581 GTTGACACTGTGAGTGCTTTGGTTTTATGATAATAAGCTTAAAGCACATAAAGACAAATCA  
17581 17590 17600 17610 17620 17630  
17581 CAACTGTGACACTCACGAAACCAAATACTATTATTCGAATTTTCGTGTATTTCTGTTTAGT  
17641 GCTCAATGCTTTAAATGTTTTATAAGGGTGTTATCACGCATGATGTTTCATCTGCAATT  
17641 17650 17660 17670 17680 17690  
17641 CGAGTTACGAAATTTTACAAAATATCCCACAATAGTGCGTACTACAAAGTAGACGTTAA  
>>>43\_F>>> 17729 to 17750  
17701 AACAGGCCACAAATAGGCGTGGTAAGAGAATTCCCTTACACGTAACCCTGCTTGAGAAAA  
17701 17710 17720 17730 17740 17750  
17701 TTGTCCGGTGTGTTTATCCGCACCATTTCTCTTAAGGAATGTGCATTGGGACGAACCTCTTTT  
17761 GCTGTCTTTATTTTACCTTATAATTACAGAATGCTGTAGCCTCAAAGATTTTGGGACTA  
17761 17770 17780 17790 17800 17810  
17761 CGACAGAAATAAAGTGGAATATTAAGTGTCTTACGACATCGGAGTTTCTAAAACCTGAT  
<<<44\_R<<< 17836 to 17857



17821 CCAACTCAAACGTGTTGATTCATCACAGGGCTCAGAATATGACTATGTCATATTCCTCA  
17821 17830 17840 17850 17860 17870  
17821 GGTTGAGTTTGACAACTAAGTAGTGTCCCGAGTCTTATACTGATACAGTATAAGTGAGTT  
17881 ACCACTGAAACAGCTCACTCTTGTAATGTAAACAGATTTAATGTTGCTATTACCAGAGCA  
17881 17890 17900 17910 17920 17930  
17881 TGGTGACTTTGTCGAGTGAGAACATTACATTTGTCTAAATTACAACGATAATGGTCTCGT  
17941 AAAGTAGGCATACCTTTGCATAATGTCTGATAGAGACCTTTATGACAAGTTGCAATTTACA  
17941 17950 17960 17970 17980 17990  
17941 TTTCATCCGTATGAAACGTATTACAGACTATCTCTGGAAATACTGTTCAACGTTAAATGT  
18001 AGTCTTGAAATTCACGTAGGAATGTGGCAACTTTACAAGCTGAAAATGTAACAGGACTC  
18001 18010 18020 18030 18040 18050  
18001 TCAGAACTTTAAGGTGCATCCTTACACCGTTGAAATGTTGACTTTTACATTGTCCTGAG  
18061 TTTAAAGATTGTAGTAAGGTAATCACTGGGTACATCCTACACAGGCACCTACACACCTC  
18061 18070 18080 18090 18100 18110  
18061 AAATTTCTAACATCATTCCATTAGTGACCAATGTAGGATGTGTCCGTGGATGTGTGGAG  
18121 AGTGTGACACTAAATTCAAACCTGAAGGTTTATGTGTTGACATACCTGGCATACTAAG  
18121 18130 18140 18150 18160 18170  
18121 TCACAACTGTGATTTAAGTTTGTGACTTCCAAATACACAACTGTATGGACCGTATGGATT  
18181 GACATGACCTATAGAAGACTCATCTCTATGATGGGTTTTAAATGAATTATCAAGTTAAT  
18181 18190 18200 18210 18220 18230  
18181 CTGTACTGGATATCTTCTGAGTAGAGATACTACCCAAAATTTTACTTAATAGTTCAATTA  
18241 GGTTACCCTAACATGTTTATCACCCGCGAAGAAGCTATAAGACATGTACGTGCATGGATT  
18241 18250 18260 18270 18280 18290  
18241 CCAATGGGATTGTACAAATAGTGGGCGCTTCTCGATATTCTGTACATGCACGTACCTAA  
18301 GGCTTCGATGTCGAGGGGTGTCATGCTACTAGAGAAGCTGTTGGTACCAATTTACCTTTA  
18301 18310 18320 18330 18340 18350  
18301 CCGAAGCTACAGCTCCCCACGTACGATGATCTCTTCGACAACCATGGTTAAATGGAAAT  
18361 CAGCTAGGTTTTTCTACAGGTGTTAACCTAGTTGCTGTACCTACAGGTTATGTTGATACA  
18361 18370 18380 18390 18400 18410  
18361 GTCGATCCAAAAGATGTCCACAATTGGATCAACGACATGGATGTCCAATACAACCTATGT  
18421 CCTAATAATACAGATTTTTCCAGAGTTAGTGCTAAACCACCGCCTGGAGATCAATTTAA  
18421 18430 18440 18450 18460 18470  
18421 GGATTATTATGTCTAAAAAGGTCTCAATCACGATTTGGTGGCGGACCTCTAGTTAAATTT  
>>>45\_F>>> 18511 to 18534  
18481 CACCTCATACCACTTATGTACAAAGGACTTCCTTGGAATGTAGTGCGTATAAAGATTGTA  
18481 18490 18500 18510 18520 18530  
18481 GTGGAGTATGGTGAATACATGTTTCCTGAAGGAACCTTACATCACGCATATTTCTAACAT  
18541 CAAATGTTAAGTGACACACTTAAAAATCTCTCTGACAGAGTCGTATTTGTCTTATGGGCA  
18541 18550 18560 18570 18580 18590  
18541 GTTTACAATTCACCTGTGTGAATTTTTAGAGAGACTGTCTCAGCATAAACAGAATACCCGT

<<<46\_R<<< 18652 to

18673

18601 CATGGCTTTGAGTTGACATCTATGAAGTATTTTGTGAAAATAGGACCTGAGCGCACCTGT  
18601 18610 18620 18630 18640 18650  
18601 GTACCGAACTCAACTGTAGATACTTCATAAAACACTTTTATCCTGGACTCGCGTGGACA  
18661 TGTCTATGTGATAGACGTGCCACATGCTTTTCCACTGCTTCAGACACTTATGCCTGTTGG  
18661 18670 18680 18690 18700 18710  
18661 ACAGATACACTATCTGCACGGTGTACGAAAAGGTGACGAAGTCTGTGAATACGGACAACC  
18721 CATCATTCTATTGGATTGATTACGTCTATAATCCGTTTATGATTGATGTTCAACAATGG  
18721 18730 18740 18750 18760 18770  
18721 GTAGTAAGATAACCTAAACTAATGCAGATATTAGGCAAATACTAACTACAAGTTGTTACC  
18781 GGTTTTACAGGTAACCTACAAAGCAACCATGATCTGTATTGTCAAGTCCATGGTAATGCA  
18781 18790 18800 18810 18820 18830  
18781 CCAAAATGTCCATTGGATGTTTCGTTGGTACTAGACATAACAGTTCAGGTACCATTACGT  
18841 CATGTAGCTAGTTGTGATGCAATCATGACTAGGTGTCTAGCTGTCCACGAGTGCTTTGTT  
18841 18850 18860 18870 18880 18890  
18841 GTACATCGATCAACACTACGTTAGTACTGATCCACAGATCGACAGGTGCTCACGAAACAA  
18901 AAGCGTGTTGACTGGACTATTGAATATCCTATAATTGGTGATGAACTGAAGATTAATGCG  
18901 18910 18920 18930 18940 18950

18901 TTCGCACAACCTGACCTGATAACTTATAGGATATTAACCACTACTTGACTTCTAATTACGC  
18961 GCTTGTAGAAAGGTTCAACACATGGTTGTTAAAGCTGCATTATTAGCAGACAAATCCCA  
18961 18970 18980 18990 19000 19010  
18961 CGAACATCTTTCCAAGTTGTGTACCAACAATTTTCGACGTAATAATCGTCTGTTTAAGGGT  
19021 GTTCTTCACGACATTGGTAACCCCTAAAGCTATTAAGTGTGTACCTCAAGCTGATGTAGAA  
19021 19030 19040 19050 19060 19070  
19021 CAAGAAGTGCTGTAACCATTGGGATTTTCGATAATTCACACATGGAGTTCGACTACATCTT  
19081 TGGAAGTTCTATGATGCACAGCCTTGTAGTGACAAAGCTTATAAAATAGAAGAATTATTC  
19081 19090 19100 19110 19120 19130  
19081 ACCTTCAAGATACTACGTGTCGGAACATCACTGTTTCGAATATTTTATCTTCTTAATAAG  
19141 TATTCTTATGCCACACATTCTGACAAATTCACAGATGGTGTATGCCTATTTTGGGAATTGC  
19141 19150 19160 19170 19180 19190  
19141 ATAAGAATACGGTGTGTAAGACTGTTTAAAGTGTCTACCACATACGGATAAAACCTTAACG  
19201 AATGTCGATAGATATCCTGCTAATTCCATTGTTTGTAGATTTGACACTAGAGTGCTATCT  
19201 19210 19220 19230 19240 19250  
19201 TTACAGCTATCTATAGGACGATTAAGGTAACAAACATCTAAACTGTGATCTCACGATAGA  
>>>47\_F>>> 19264 to 19285  
19261 AACCTTAACTTGCCTGGTGTGATGGTGGCAGTTTGTATGTAAATAAACATGCATTCCAC  
19261 19270 19280 19290 19300 19310  
19261 TTGGAATTGAACGGACCAACACTACCACCGTCAAACATACATTTATTTGTACGTAAGGTG  
19321 ACACCAGCTTTTTGATAAAAGTGCTTTTGTAAATTTAAACAATTACCATTTTTCTATTAC  
19321 19330 19340 19350 19360 19370  
19321 TGTGGTCGAAAACCTATTTTCACGAAAACAATTAAATTTTGTAAATGGTAAAAAGATAATG  
19381 TCTGACAGTCCATGTGAGTCTCATGGAAAACAAGTAGTGTGAGATATAGATTATGTACCA  
19381 19390 19400 19410 19420 19430  
19381 AGACTGTCAGGTACACTCAGAGTACCTTTTGTTCATCACAGTCTATATCTAATACATGGT  
<<<48\_R<<< 19470 to 19491  
19441 CTAAAGTCTGCTACGTGTATAACACGTTGCAATTTAGGTGGTGTCTGTCTGTAGACATCAT  
19441 19450 19460 19470 19480 19490  
19441 GATTTTCAGACGATGCACATATTGTGCAACGTTAAATCCACCACGACAGACATCTGTAGTA  
19501 GCTAATGAGTACAGATTGTATCTCGATGCTTATAACATGATGATCTCAGCTGGCTTTAGC  
19501 19510 19520 19530 19540 19550  
19501 CGATTACTCATGTCTAACATAGAGCTACGAATATTGTACTACTAGAGTCGACCGAAATCG  
19561 TTGTGGGTTTACAAACAATTTGATACTTATAACCTCTGGAACACTTTTACAAGACTTCAG  
19561 19570 19580 19590 19600 19610  
19561 AACACCCAAATGTTTGTAAACTATGAATATTGGAGACCTTGTGAAAATGTTCTGAAGTC  
19621 AGTTTtagAAAATGTGGCTTTTAAATGTTGTAAATAAGGGACACTTTGATGGACAACAGGGT  
19621 19630 19640 19650 19660 19670  
19621 TCAAATCTTTTACACCGAAAATTACAACATTTATTTCCCTGTGAAACTACCTGTTGTCCCA  
19681 GAAGTACCAGTTTCTATCATTAATAACACTGTTTACACAAAAGTTGATGGTGTGATGTA  
19681 19690 19700 19710 19720 19730  
19681 CTTTCATGGTCAAAGATAGTAATTATTGTGACAAATGTGTTTTCAACTACCACAACCTACAT  
19741 GAATTGTTTGAATAAAACAACATTACCTGTTAATGTAGCATTTGAGCTTTGGGCTAAG  
19741 19750 19760 19770 19780 19790  
19741 CTTAACAACTTTTTATTTTGTGTAATGGACAATTACATCGTAAACTCGAAACCCGATTCT  
19801 CGCAACATTAAACCAGTACCAGAGGTGAAAATACTCAATAATTTGGGTGTGGACATTGCT  
19801 19810 19820 19830 19840 19850  
19801 GCGTTGTAATTTGGTCATGGTCTCCACTTTTATGAGTTATTAAACCCACACCTGTAACGA  
19861 GCTAATACTGTGATCTGGGACTACAAAAGAGATGCTCCAGCACATATATCTACTATTGGT  
19861 19870 19880 19890 19900 19910  
19861 CGATTATGACACTAGACCCTGATGTTTCTCTACGAGGTCGTGTATATAGATGATAACCA  
19921 GTTTGTTCTATGACTGACATAGCCAAGAAACCAACTGAAACGATTTGTGCACCACTCACT  
19921 19930 19940 19950 19960 19970  
19921 CAAACAAGATACTGACTGTATCGGTTCTTTGGTTGACTTTGCTAAACACGTGGTGAGTGA  
19981 GTCTTTTTTGTGATGGTAGAGTTGATGGTCAAGTAGACTTATTTAGAAATGCCCGTAATGGT  
19981 19990 20000 20010 20020 20030  
19981 CAGAAAAAACTACCATCTCAACTACCAGTTCATCTGAATAAATCTTTACGGGCATTACCA  
>>>49\_F>>> 20081 to 20102  
20041 GTTCTTATTACAGAAGGTAGTGTAAAGGTTTACAACCATCTGTAGGTCCCAAACAAGCT

20041            20050            20060            20070            20080            20090  
 20041 CAAGAATAATGTCTTCCATCACAATTTCCAAATGTTGGTAGACATCCAGGGTTTGTTCGA  
 20101 AGTCTTAATGGAGTCACATTAATTGGAGAAGCCGTAAAAACACAGTTCAATTATTATAAG  
 20101            20110            20120            20130            20140            20150  
 20101 TCAGAATTACCTCAGTGTAAATTAACCTCTTCGGCATTTTTGTGTCAAGTTAATAATATTC  
 20161 AAAGTTGATGGTGTGTGTTCAACAATTACCTGAACTTACTTTACTCAGAGTAGAAATTTA  
 20161            20170            20180            20190            20200            20210  
 20161 TTTCAACTACCACAACAGGTTGTAAATGGACTTTGAATGAAATGAGTCTCATCTTTAAAT  
                  <<<50\_R<<< 20233 to 20254  
 20221 CAAGAATTTAAACCCAGGAGTCAAATGGAAATGATTTCTTAGAATTAGCTATGGATGAA  
 20221            20230            20240            20250            20260            20270  
 20221 GTTCTTAAATTTGGGTCCTCAGTTTACCTTTAACTAAAGAATCTTAATCGATACCTACTT  
 20281 TTCATTGAACGGTATAAATTAGAAGGTATGCCTTCGAACATATCGTTTATGGAGATTTT  
 20281            20290            20300            20310            20320            20330  
 20281 AAGTAACTTGCCATATTTAATCTTCCGATACGGAAGCTTGTATAGCAAATACCTCTAAAA  
 20341 AGTCATAGTCAGTTAGGTGGTTTACATCTACTGATTGGACTAGCTAAACGTTTTAAGGAA  
 20341            20350            20360            20370            20380            20390  
 20341 TCAGTATCAGTCAATCCACCAAATGTAGATGACTAACCTGATCGATTTGCAAAATTCCTT  
 20401 TCACCTTTTGAATTAGAAGATTTTATTCCTATGGACAGTACAGTTAAAACTATTTTCATA  
 20401            20410            20420            20430            20440            20450  
 20401 AGTGGAAAACCTTAATCTTCTAAAATAAGGATACCTGTCTATGTCAATTTTTTGATAAAGTAT  
 20461 ACAGATGCGCAAACAGGTTTCATCTAAGTGTGTGTCTGTTATTGATTTATTACTTGAT  
 20461            20470            20480            20490            20500            20510  
 20461 TGTCTACGCGTTTGTCCAAGTAGATTACACACACAAGACAATAACTAAATAATGAACATA  
 20521 GATTTTGTGTGAATAATAAAATCCCAAGATTTATCTGTAGTTTCTAAGGTTGTCAAAGTG  
 20521            20530            20540            20550            20560            20570  
 20521 CTAAAACAACCTTTATTATTTTAGGGTTCTAAATAGACATCAAAGATTCCAACAGTTTCAC  
 20581 ACTATTGACTATACAGAAATTTTCATTTATGCTTTGGTGTAAGATGGCCATGTAGAAACA  
 20581            20590            20600            20610            20620            20630  
 20581 TGATAACTGATATGTCTTTAAAGTAAATACGAAACCACATTTCTACCGGTACATCTTTGT  
 20641 TTTTACCCAAAATTACAATCTAGTCAAGCGTGGCAACCGGGTGTGCTATGCCTAATCTT  
 20641            20650            20660            20670            20680            20690  
 20641 AAAATGGGTTTTAATGTTAGATCAGTTCGCACCGTTGGCCCAACGATACGGATTAGAA  
 20701 TACAAAATGCAAAGAATGCTATTAGAAAAGTGTGACCTTCAAATATGGTGATAGTGCA  
 20701            20710            20720            20730            20740            20750  
 20701 ATGTTTTACGTTTCTTACGATAATCTTTTCACACTGGAAGTTTTAATACCACTATCACGT  
 20761 ACATTACCTAAAGGCATAATGATGAATGTCGCAAAATATACTCAACTGTGTCAATATTTA  
 20761            20770            20780            20790            20800            20810  
 20761 TGTAATGGATTTCCGTATTACTACTTACAGCGTTTTATATGAGTTGACACAGTTATAAAT  
                  >>>51\_F>>> 20833 to 20857  
 20821 AACACATTAACATTAGCTGTACCCTATAATATGAGAGTTATACATTTTGGTGCTGGTTCT  
 20821            20830            20840            20850            20860            20870  
 20821 TTGTGTAATTGTAATCGACATGGGATATTATACTCTCAATATGTAAAACACGACCAAGA  
 20881 GATAAAGGAGTTGCACCAGGTACAGCTGTTTAAAGACAGTGGTTGCCTACGGGTACGCTG  
 20881            20890            20900            20910            20920            20930  
 20881 CTATTTCTCAACGTGGTCCATGTGACAAAATTTCTGTACCAACGGATGCCCATGCGAC  
                  <<<52\_R<<< 20991 to  
 21012  
 20941 CTTGTGATTTCAGATCTTAATGACTTTGTCTCTGATGCAGATTCAACTTTGATTGGTGAT  
 20941            20950            20960            20970            20980            20990  
 20941 GAACAGCTAAGTCTAGAATTACTGAAACAGAGACTACGTCTAAGTTGAAACTAACCCTA  
 21001 TGTGCAACTGTACATACAGCTAATAAATGGGATCTCATTATTAGTGATATGTACGACCCT  
 21001            21010            21020            21030            21040            21050  
 21001 ACACGTTGACATGTATGTCGATTATTTACCCTAGAGTAATAATCACTATACATGCTGGGA  
 21061 AAGACTAAAAATGTTACAAAAGAAAATGACTCTAAAGAGGGTTTTTCACTTACATTTGT  
 21061            21070            21080            21090            21100            21110  
 21061 TTCTGATTTTTACAATGTTTTCTTTTACTGAGATTTCTCCCAAAAAAGTGAATGTAAACA  
 21121 GGGTTTATACAACAAAAGCTAGCTCTTGGAGGTTCCGTGGCTATAAAGATAACAGAACAT  
 21121            21130            21140            21150            21160            21170

21121 CCCAAATATGTTGTTTTTCGATCGAGAACCTCCAAGGCACCGATATTTCTATTGTCTTGTA  
21181 TCTTGGAATGCTGATCTTTATAAGCTCATGGGACACTTCGCATGGTGGACAGCCTTTGTT  
21181 21190 21200 21210 21220 21230  
21181 AGAACCTTACGACTAGAAATATTCGAGTACCCTGTGAAGCGTACCACCTGTCGGAAACAA  
21241 ACTAATGTGAATGCGTCATCATCTGAAGCATTTTTTAATTGGATGTAATTATCTTGGCAA  
21241 21250 21260 21270 21280 21290  
21241 TGATTACACTTACGCAGTAGTAGACTTCGTAAAAATTAACCTACATTAATAGAACCGTTT  
21301 CCACGCGAACAATAAGATGGTTATGTCATGCATGCAAATTACATATTTTGGAGGAATACA  
21301 21310 21320 21330 21340 21350  
21301 GGTGCGCTTGTCTTATCTACCAATACAGTACGTACGTTTAATGTATAAAACCTCCTTATGT  
21361 AATCCAATTACAGTTGTCTTCCTATTCTTTATTTGACATGAGTAAATTTCCCCTTAAATTA  
21361 21370 21380 21390 21400 21410  
21361 TTAGGTTAAGTCAACAGAAGGATAAGAAAATAAACTGTACTCATTAAAGGGGAATTTAAT  
21421 AGGGGTACTGCTGTTATGTCTTTAAAAGAAGGTCAAATCAATGATATGATTTTATCTCTT  
21421 21430 21440 21450 21460 21470  
21421 TCCCCATGACGACAATACAGAAATTTTCTTCCAGTTTAGTTACTATACTAAAATAGAGAA  
21481 CTTAGTAAAGGTAGACTTATAATTAGAGAAAACAACAGAGTTGTTATTTCTAGTGATGTT  
21481 21490 21500 21510 21520 21530  
21481 GAATCATTTCCATCTGAATATTAATCTCTTTTGTGTCTCAACAATAAAGATCACTACAA  
21541 CTTGTTAACAATAAACAAGCAATGTTTGTCTTTCTTGTCTTTATTGCCACTAGTCTCTAG  
21541 21550 21560 21570 21580 21590  
21541 GAACAATTGTTGATTTGCTTGTTACAAACAAAAAGAACAATAACGGTGATCAGAGATC  
>>>53\_F>>> 21616 to 21637  
21601 TCAGTGTGTTAATCTTACAACAGAACTCAATTACCCCTGCATACACTAATTCTTTTAC  
21601 21610 21620 21630 21640 21650  
21601 AGTCACACAAATAGAAATGTTGGTCTTGAGTTAATGGGGGACGTATGTGATTAAGAAAGTG  
21661 ACGTGGTGTTTTATTACCCTGACAAAGTTTTCAGATCCTCAGTTTACATTCAACTCAGGA  
21661 21670 21680 21690 21700 21710  
21661 TGCACCACAAATAATGGGACTGTTTCAAAAGTCTAGGAGTCAAAATGTAAGTTGAGTCCT  
<<<54\_R<<< 21742 to 21763  
21721 CTTGTTCTTACCTTTCTTTTCCAATGTTACTTGGTTCATGCTATACATGTCTCTGGGAC  
21721 21730 21740 21750 21760 21770  
21721 GAACAAGAATGGAAAGAAAAGGTTACAATGAACCAAGGTACGATATGTACAGAGACCCTG  
21781 CAATGGTACTAAGAGGTTTGATAACCTGTCCCTACCATTTAATGATGGTGTTTATTTTGC  
21781 21790 21800 21810 21820 21830  
21781 GTTACCATGATTCTCCAACTATTGGGACAGGATGGTAAATTACTACCACAAATAAAACG  
21841 TTCCACTGAGAAGTCTAACATAATAAGAGGCTGGATTTTGGTACTACTTTAGATTTCGAA  
21841 21850 21860 21870 21880 21890  
21841 AAGGTGACTCTTCAGATTGTATTATTCTCGACCTAAAAACCATGATGAAATCTAAGCTT  
21901 GACCCAGTCCCTACTTATTGTTAATAACGCTACTAATGTTGTTATTAAAGTCTGTGAATT  
21901 21910 21920 21930 21940 21950  
21901 CTGGGTGAGGATGAATAACAATTATTGCGATGATTACAACAATAATTTAGACACTTAA  
21961 TCAATTTTGTAAATGATCCATTTTGGGTGTTTATTACCACAAAAACAACAAAGTTGGAT  
21961 21970 21980 21990 22000 22010  
21961 AGTTAAACATTACTAGGTAAAAACCCACAAATAATGGTGTTTTTGTGTTTTCAACCTA  
22021 GGAAAGTGAGTTTCAGAGTTTATTCTAGTGCGAATAATTGCACTTTTGAATATGTCTCTCA  
22021 22030 22040 22050 22060 22070  
22021 CCTTTCCTCAAGTCTCAAATAAGATCACGCTTATTAACGTGAAAACCTTATACAGAGAGT  
22081 GCCTTTTCTTATGGACCTTGAAGGAAAACAGGGTAATTTCAAAAATCTTAGGGAATTTGT  
22081 22090 22100 22110 22120 22130  
22081 CGGAAAAGAATACCTGGAACCTCCTTTTGTCCCATTAAAGTTTTTGAATCCCTTAAACA  
22141 GTTTAAGAATATTGATGGTTATTTTAAAAATATATTCTAAGCACACGCCTATTAATTTAGT  
22141 22150 22160 22170 22180 22190  
22141 CAAATTCCTTATACTACCAATAAAATTTTATATAAGATTCGTGTGCGGATAATTAAATCA  
22201 GCGTGATCTCCCTCAGGGTTTTTCGGCTTTAGAACCATTGGTAGATTTGCCAATAGGTAT  
22201 22210 22220 22230 22240 22250  
22201 CGCACTAGAGGGAGTCCCAAAAAGCCGAAATCTTGGTAACCATCTAAACGGTTATCCATA  
22261 TAACATCACTAGGTTTCAAACCTTACTTGCTTTACATAGAAGTTATTTGACTCCTGGTGA  
22261 22270 22280 22290 22300 22310

22261 ATTGTAGTGATCCAAAGTTTGAAATGAACGAAATGTATCTTCAATAAACTGAGGACCACT  
22321 TTCTTCTTCAGGTTGGACAGCTGGTGTGCTGACGCTTATTATGTGGGTATCTTCAACCTAG  
22321 22330 22340 22350 22360 22370  
22321 AAGAAGAAGTCCAACCTGTGACCACGACGTGGAATAATACACCAATAGAAGTTGGATC  
22381 GACTTTTCTATTAAAAATATAATGAAAAATGGAACCATTTACAGATGCTGTAGACTGTGCACT  
22381 22390 22400 22410 22420 22430  
22381 CTGAAAAGATAATTTTATATTACTTTTACCTTGGTAATGTCTACGACATCTGACACGTGA  
>>>55\_F>>> 22443 to 22464  
22441 TGACCTCTCTCAGAAACAAAGTGTACGTTGAAATCCTTCACTGTAGAAAAAGGAATCTA  
22441 22450 22460 22470 22480 22490  
22441 ACTGGGAGAGAGTCTTTGTTTCACATGCAACTTTAGGAAGTGACATCTTTTTCTTAGAT  
22501 TCAAACCTTCTAACTTTAGAGTCCAACCAACAGAATCTATTGTTAGATTTCCTAATATTAC  
22501 22510 22520 22530 22540 22550  
22501 AGTTTGAAGATTGAAATCTCAGGTTGGTGTCTTAGATAACAATCTAAAGGATTATAATG  
<<<56\_R<<< 22591 to 22609  
22561 AAACCTTGTGCCCTTTTGGTGAAGTTTAAACGCCACCAGATTTGCATCTGTTTATGCTTG  
22561 22570 22580 22590 22600 22610  
22561 TTTGAACACGGGAAAACCACTTCAAAAATTGCGGTGGTCTAAACGTAGACAAATACGAAC  
22621 GAACAGGAAGAGAATCAGCAACTGTGTGCTGATTATTCTGTCCTATATAATTCGCATC  
22621 22630 22640 22650 22660 22670  
22621 CTTGTCCTTCTCTTAGTCGTTGACACAACGACTAATAAGACAGGATATATTAAGGCGTAG  
22681 ATTTTCCACTTTTAAAGTGTATGGAGTGTCTCCTACTAAATTAAATGATCTCTGCTTTAC  
22681 22690 22700 22710 22720 22730  
22681 TAAAAGGTGAAAATTCACAATACCTCAGAGGATGATTTAATTTACTAGAGACGAAATG  
22741 TAATGTCTATGCAGATTCAATTTGTAATTAGAGGTGATGAAGTCAGACAAATCGCTCCAGG  
22741 22750 22760 22770 22780 22790  
22741 ATTACAGATACGTCTAAGTAAACATTAATCTCCACTACTTCAGTCTGTTTAGCGAGGTCC  
22801 GCAAACCTGGAAAGATTGCTGATTATAAATTATAAATTACCAGATGATTTTACAGGCTGCGT  
22801 22810 22820 22830 22840 22850  
22801 CGTTTGACCTTTCTAACGACTAATATTAATTTAATGGTCTACTAAAATGTCCGACGCA  
22861 TATAGCTTGGAATTTCTAACAATCTTGATTCTAAGGTTGGTGGTAATTATAATTACCTGTA  
22861 22870 22880 22890 22900 22910  
22861 ATATCGAACCTTAAGATTGTTAGAACTAAGATTCCAACCACCATTAATATTAATGGACAT  
22921 TAGATTGTTTGGGAAGTCTAATCTCAAACCTTTTGAGAGAGATATTTCAACTGAAATCTA  
22921 22930 22940 22950 22960 22970  
22921 ATCTAACAATCCTTCAGATTAGAGTTTGAAAACTCTCTCTATAAAGTTGACTTTAGAT  
22981 TCAGGCCGGTAGCACACCTTGTAATGGTGTGTAAGGTTTTAATTGTTACTTTCTTTTACA  
22981 22990 23000 23010 23020 23030  
22981 AGTCCGCCATCGTGTGGAACATTACCACAACCTTCCAAAATTAACAATGAAAGGAAATGT  
23041 ATCATATGGTTTCCAACCCACTAATGGTGTGGTTACCAACCATAACAGAGTAGTAGTACT  
23041 23050 23060 23070 23080 23090  
23041 TAGTATACCAAAGGTTGGGTGATTACCACAACCAATGGTTGGTATGTCTCATCATCATGA  
23101 TTCTTTTGAACCTTCTACATGCACCAGCAACTGTTTGTGGACCTAAAAAGTCTACTAATTT  
23101 23110 23120 23130 23140 23150  
23101 AAGAAAACCTTGAAGATGTACGTGGTCTGACAAACACCTGGATTTTTTCAAGATGATTAAA  
23161 GGTTAAAAACAAATGTGTCAATTTCAACTTCAATGGTTTTAACAGGCACAGGTGTTCTTAC  
23161 23170 23180 23190 23200 23210  
23161 CCAATTTTTGTTTACACAGTTAAAGTTGAAGTTACCAAATTGTCCGTGTCCACAAGAATG  
23221 TGAGTCTAACAAAAAGTTTCTGCCTTTCCAACAATTTGGCAGAGACATTGCTGACACTAC  
23221 23230 23240 23250 23260 23270  
23221 ACTCAGATTGTTTTTCAAAGACGGAAAGTTGTTAAACCGTCTCTGTAACGACTGTGATG  
>>>57\_F>>> 23297 to 23318  
23281 TGATGCTGTCCGTGATCCACAGACACTTGAGATTCTTGACATTACACCATGTTCTTTTGG  
23281 23290 23300 23310 23320 23330  
23281 ACTACGACAGGCACTAGGTGTCTGTGAACTCTAAGAACTGTAATGTGGTACAAGAAAACC  
23341 TGGTGTCTAGTGTATATAACACCAGGAACAAATACTTCTAACCAGGTTGCTGTTCTTTATCA  
23341 23350 23360 23370 23380 23390  
23341 ACCACAGTCACAATATTGTGGTCCTTGTTTATGAAGATTGGTCCAACGACAAGAAATAGT

<<<58\_R<<< 23457

to 23478

```
23401 GGATGTTAACTGCACAGAAGTCCCTGTTGCTATTCATGCAGATCAACTTACTCCTACTTG
23401      23410      23420      23430      23440      23450
23401 CCTACAATTGACGTGTCTTCAGGGACAACGATAAGTACGTCTAGTTGAATGAGGATGAAC
23461 GCGTGTTTATTCTACAGGTTCTAATGTTTTTCAAACACGTGCAGGCTGTTTAATAGGGGC
23461      23470      23480      23490      23500      23510
23461 CGCACAAATAAGATGTCCAAGATTACAAAAAGTTTGTGCACGTCCGACAAATTATCCCCG
23521 TGAACATGTCAACAACATCATATGAGTGTGACATACCCATTGGTGCAGGTATATGCGCTAG
23521      23530      23540      23550      23560      23570
23521 ACTTGTACAGTTGTTGAGTATACTCACACTGTATGGGTAACCACGTCCATATACGCGATC
23581 TTATCAGACTCAGACTAATTCCTCCGCGGGCACGTAGTGTAGCTAGTCAATCCATCAT
23581      23590      23600      23610      23620      23630
23581 AATAGTCTGAGTCTGATTAAGAGGAGCCGCGCCGTGCATCACATCGATCAGTTAGGTAGTA
23641 TGCCTACACTATGTCACTTGGTGCAGAAAATTCAGTTGCTTACTCTAATAACTCTATTGC
23641      23650      23660      23670      23680      23690
23641 ACGGATGTGATACAGTGAACCACGTCTTTTAAGTCAACGAATGAGATTATTGAGATAACG
23701 CATACCCACAAATTTTACTATTAGTGTACCACAGAAATTCTACCAGTGTCTATGACCAA
23701      23710      23720      23730      23740      23750
23701 GTATGGGTGTTTTAAATGATAATCACAATGGTGTCTTTAAGATGGTCACAGATACTGGTT
23761 GACATCAGTAGATTGTACAATGTACATTTGTGGTGATTCAACTGAATGCAGCAATCTTTT
23761      23770      23780      23790      23800      23810
23761 CTGTAGTCATCTAACATGTTACATGTAACACCACTAAGTTGACTTACGTCGTTAGAAAA
23821 GTTGCAATATGGCAGTTTTTGTACACAATTAAACCGTGCTTTAACTGGAATAGCTGTTGA
23821      23830      23840      23850      23860      23870
23821 CAACGTTATACCGTCAAAAACATGTGTTAATTTGGCAGCAAATTGACCTTATCGACAAC
23881 ACAAGACAAAAACACCCAAGAAGTTTTTGCACAAGTCAAACAAATTTACAAAACACCACC
23881      23890      23900      23910      23920      23930
23881 TGTTCTGTTTTTGTGGGTTCTTCAAAAACGTGTTTCAGTTTGTTTAAATGTTTTGTGGTGG
23941 AATTAAAGATTTTGGTGGTTTTAATTTTTTCACAAATATTACCAGATCCATCAAAACCAAG
23941      23950      23960      23970      23980      23990
23941 TTAATTTCTAAAACCACCAAAATTA AAAAGTGTTTATAATGGTCTAGGTAGTTTTGGTTC
24001 CAAGAGGTCATTTATTGAAGATCTACTTTTCAACAAAGTGACACTTGACAGATGCTGGCTT
24001      24010      24020      24030      24040      24050
24001 GTTCTCCAGTAAATAACTTCTAGATGAAAAGTTGTTTCACTGTGAACGTCTACGACCGAA
>>>59_F>>> 24077 to 24098
24061 CATCAAACAATATGGTGATTGCCCTGGTGATATTGCTGCTAGAGACCTCATTTGTGCACA
24061      24070      24080      24090      24100      24110
24061 GTAGTTTGTATACCCTAACGGAACCACTATAACGACGATCTCTGGAGTAAACACGTGT
24121 AAAGTTTAACGGCCTTACTGTTTTGCCACCTTTGCTCACAGATGAAATGATTGCTCAATA
24121      24130      24140      24150      24160      24170
24121 TTTCAAATTGCCGAATGACAAAACGGTGGAACGAGTGTCTACTTTACTAACGAGTTAT
```

<<<60\_R<<< 24233 to

24254

```
24181 CACTTCTGCACTGTTAGCGGGTACAATCACTTCTGGTTGGACCTTTGGTGCAGGTGCTGC
24181      24190      24200      24210      24220      24230
24181 GTGAAGACGTGACAATCGCCCATGTTAGTGAAGACCAACCTGGAACACGTCCACGACG
24241 ATTACAAATACCATTGCTATGCAAATGGCTTATAGGTTAATGGTATTGGAGTTACACA
24241      24250      24260      24270      24280      24290
24241 TAATGTTTATGGTAAACGATACGTTTACCGAATATCCAAATTACCATAACCTCAATGTGT
24301 GAATGTTCTCTATGAGAACC AAAATGATTGCCAACCAATTTAATAGTGCTATTGGCAA
24301      24310      24320      24330      24340      24350
24301 CTTACAAGAGATACTCTTGGTTTTTAACTAACGGTTGGTTAAATTATCACGATAACCGTT
24361 AATTCAAGACTCACTTTCTTCCACAGCAAGTGCACCTTGGAACCTTCAAGATGTGGTCAA
24361      24370      24380      24390      24400      24410
24361 TTAAGTTCTGAGTGAAAGAAGGTGTCGTTACGTGAACCTTTTGAAGTTCTACACCAGTT
24421 CCAAAATGCACAAGCTTTAAACACGCTTGTTAAACAACCTTAGCTCCAATTTTGGTGCAAT
24421      24430      24440      24450      24460      24470
24421 GGTTTTACGTGTTTCGAAATTTGTGCGAACAAATTTGTTGAATCGAGGTAAAACACGTTA
```

24481 TTCAAGTGTGTTTAAATGATATCCTTTACGTCTTGACAAAAGTTGAGGCTGAAGTGCAAAT  
 24481 24490 24500 24510 24520 24530  
 24481 AAGTTCACAAAATTTACTATAGGAAAGTGCAGAACTGTTTCAACTCCGACTTCACGTTTA  
 24541 TGATAGGTTGATCACAGGCAGACTTCAAAGTTTGCAGACATATGTGACTCAACAATTAAT  
 24541 24550 24560 24570 24580 24590  
 24541 ACTATCCAAC TAGTGTCCGTCTGAAGTTTCAAACGTCTGTATACACTGAGTTGTTAATTA  
 24601 TAGAGCTGCAGAAATCAGAGCTTCTGCTAATCTTGCTGCTACTAAAATGTCAGAGTGTGT  
 24601 24610 24620 24630 24640 24650  
 24601 ATCTCGACGTCTTTAGTCTCGAAGACGATTAGAACGACGATGATTTTACAGTCTCACACA  
 24661 ACTTGGACAATCAAAAAGAGTTGATTTTGTGGAAAGGGCTATCATCTTATGTCCTTCCC  
 24661 24670 24680 24690 24700 24710  
 24661 TGAACCTGTTAGTTTTTCTCAACTAAAAACACCTTTCCCGATAGTAGAATACAGGAAGGG  
 24721 TCAGTCAGCACCTCATGGTGTAGTCTTCTGTCATGTGACTTATGTCCCTGCACAAGAAAA  
 24721 24730 24740 24750 24760 24770  
 24721 AGTCAGTCGTGGAGTACCACATCAGAAGAAGCTACACTGAATACAGGGACGTGTTCTTTT  
 24781 GAACTTCACAACTGCTCCTGCCATTTGTCATGATGGAAAAGCACACTTTCCTCGTGAAGG  
 24781 24790 24800 24810 24820 24830  
 24781 CTTGAAGTGTGACGAGGACGGTAAACAGTACTACCTTTTCGTGTGAAAGGAGCACTTCC

>>>61\_F>>> 24895 to

24919

24841 TGTCTTTGTTTCAAATGGCACACACTGGTTTGTAAACACAAAGGAATTTTTATGAACCACA  
 24841 24850 24860 24870 24880 24890  
 24841 ACAGAAACAAAGTTTACCGTGTGTGACCAACATTGTGTTTCCCTTAAAAATACTTGGTGT  
 24901 AATCATTACTACAGACAACACATTTGTGTCTGGTAACTGTGATGTTGTAATAGGAATTGT  
 24901 24910 24920 24930 24940 24950  
 24901 TTAGTAATGATGTCTGTTGTGTAAACACAGACCATTGACACTACAACATTATCCTTAACA  
 24961 CAACAACACAGTTTATGATCCTTTGCAACCTGAATTAGACTCATTCAAGGAGGATTAGA  
 24961 24970 24980 24990 25000 25010  
 24961 GTTGTGTGTCAAATACTAGGAAACGTTGGACTTAATCTGAGTAAGTTCCTCCTCAATCT  
 <<<62\_R<<< 25055 to 25076  
 25021 TAAATATTTTAAAGATCATAATCACCAGATGTTGATTTAGGTGACATCTCTGGCATTAA  
 25021 25030 25040 25050 25060 25070  
 25021 ATTTATAAAATTCCTTAGTATGTAGTGGTCTACAACATAATCCACTGTAGAGACCGTAATT  
 25081 TGCTTCAGTTGTAAACATTCAAAAAGAAATTGACCGCCTCAATGAGGTTGCCAAGAATTT  
 25081 25090 25100 25110 25120 25130  
 25081 ACGAAGTCAACATTTGTAAGTTTTTCTTTAACTGGCGGAGTTACTCCAACGGTTCTTAAA  
 25141 AAATGAATCTCTCATCGATCTCCAAGAACTTGGAAGTATGAGCAGTATATAAAATGGCC  
 25141 25150 25160 25170 25180 25190  
 25141 TTTACTTAGAGAGTAGCTAGAGGTTCTTGAACCTTTCATACTCGTCATATATTTTACCGG  
 25201 ATGGTACATTTGGCTAGGTTTTATAGCTGGCTTGATTGCCATAGTAATGGTGACAATTAT  
 25201 25210 25220 25230 25240 25250  
 25201 TACCATGTAAACCGATCCAAAATATCGACCGAACTAACGGTATCATTACCACTGTTAATA  
 25261 GCTTTGCTGTATGACCAGTTGCTGTAGTTGTCTCAAGGGCTGTTGTTCTTGTGGATCCTG  
 25261 25270 25280 25290 25300 25310  
 25261 CGAAACGACATACTGGTCAACGACATCAACAGAGTTCCCGACAACAAGAACACCTAGGAC  
 25321 CTGCAAATTTGATGAAGACGACTCTGAGCCAGTGCTCAAAGGAGTCAAATTACATTACAC  
 25321 25330 25340 25350 25360 25370  
 25321 GACGTTTAACTACTTCTGCTGAGACTCGGTCACGAGTTTCCTCAGTTTAATGTAATGTG  
 25381 ATAAACGAACCTTATGGATTTGTTTATGAGAATCTTCACAATTGGAACGTAACTTTGAAG  
 25381 25390 25400 25410 25420 25430  
 25381 TATTTGCTTGAATACCTAAACAAAATACTCTTAGAAGTGTTAACCTTGACATTGAACTTC  
 25441 CAAGGTGAAATCAAGGATGCTACTCCTTCAGATTTTGTTCGCGCTACTGCAACGATACCG  
 25441 25450 25460 25470 25480 25490  
 25441 GTTCCACTTTAGTTCCTACGATGAGGAAGTCTAAAAACAAGCGCGATGACGTTGCTATGGC  
 25501 ATACAAGCCTCACTCCCTTTTCGGATGGCTTATTGTTGGCGTTGCACTTCTTGCTGTTTTT  
 25501 25510 25520 25530 25540 25550  
 25501 TATGTTTCGGAGTGAGGGAAAGCCTACCGAATAACAACCGCAACGTGAAGAACGACAAAAA  
 25561 CAGAGCGCTTCCAAAATCATAACCCCTCAAAAAGAGATGGCAACTAGCACTCTCCAAGGGT  
 25561 25570 25580 25590 25600 25610

25561 GTCTCGCGAAGGTTTTAGTATTGGGAGTTTTTCTCTACCGTTGATCGTGAGAGGTTCCCA  
 >>>63\_F>>> 25637 to 25658  
 25621 GTTCACTTTGTTTGCAACTTGCTGTTGTTTGTAAACAGTTTACTCACACCTTTTGCTC  
 25621 25630 25640 25650 25660 25670  
 25621 CAAGTGAACAAACGTTGAACGACAACAACAAACATTGTCAAATGAGTGTGGAAAACGAG  
 25681 GTTGCTGCTGGCCTTGAAGCCCCTTTTCTCTATCTTTATGCTTTAGTCTACTTCTTGCAG  
 25681 25690 25700 25710 25720 25730  
 25681 CAACGACGACCGGAACCTTCGGGGAAAAGAGATAGAAATACGAAATCAGATGAAGAACGTC  
 25741 AGTATAAACTTTGTAAGAATAATAATGAGGCTTTGGCTTTGCTGGAAATGCCGTTCCAAA  
 25741 25750 25760 25770 25780 25790  
 25741 TCATATTTGAAACATTCTTATTATTACTCCGAAACCGAAACGACCTTTACGGCAAGGTTT  
 <<<64\_R<<< 25835 to 25857  
 25801 AACCCATTACTTTTATGATGCCAACTATTTTCTTTGCTGGCATACTAATTGTTACGACTAT  
 25801 25810 25820 25830 25840 25850  
 25801 TTGGGTAATGAAATACTACGGTTGATAAAAGAAACGACCGTATGATTAACAATGCTGATA  
 25861 TGTATACCTTACAATAGTGTAACCTTCAATTGTCATTACTTCAGGTGATGGCACAACA  
 25861 25870 25880 25890 25900 25910  
 25861 ACATATGGAATGTTATCACATTGAAGAAGTTAACAGTAATGAAGTCCACTACCGTGTGT  
 25921 AGTCCTATTTCTGAACATGACTACCAGATTGGTGGTTATACTGAAAAATGGGAATCTGGA  
 25921 25930 25940 25950 25960 25970  
 25921 TCAGGATAAAGACTTGTACTGATGGTCTAACCACCAATATGACTTTTTACCCTTAGACCT  
 25981 GTAAAAGACTGTGTTGTATTACACAGTTACTTCACTTCAGACTATTACCAGCTGTACTCA  
 25981 25990 26000 26010 26020 26030  
 25981 CATTTTCTGACACAACATAATGTGTCAATGAAGTGAAGTCTGATAATGGTCGACATGAGT  
 26041 ACTCAATTGAGTACAGACACTGGTGTTGAACATGTTACCTTCTTCATCTACAATAAAATT  
 26041 26050 26060 26070 26080 26090  
 26041 TGAGTTAACTCATGTCTGTGACCACAACCTTGTAATGGAAGAAGTAGATGTTATTTTAA  
 26101 GTTGATGAGCCTGAAGAACATGTCCAATTACACACAATCGACGGTTCATCCGGAGTTGTT  
 26101 26110 26120 26130 26140 26150  
 26101 CAACTACTCGGACTTCTTGTACAGGTTTAAAGTGTGTTAGCTGCCAAGTAGGCCTCAACAA  
 26161 AATCCAGTAATGGAACCAATTTATGATGAACCGACGACGACTACTAGCGTGCCTTTGTAA  
 26161 26170 26180 26190 26200 26210  
 26161 TTAGGTCATTACCTTGGTTAAATACTACTTGGCTGCTGCTGATGATCGCACGGAAACATT  
 26221 GCACAAGCTGATGAGTACGAACCTTATGTAATCATTCGTTTCGGAAGAGACAGGTACGTTA  
 26221 26230 26240 26250 26260 26270  
 26221 CGTGTTGACTACTCATGCTTGAATACATGAGTAAGCAAAGCCTTCTCTGTCCATGCAAT  
 26281 ATAGTTAATAGCGTACTTCTTTTTCTTGCTTTCGTGGTATTCTTGCTAGTTACACTAGCC  
 26281 26290 26300 26310 26320 26330  
 26281 TATCAATTATCGCATGAAGAAAAAGAACGAAAGCACCATAAGAACGATCAATGTGATCGG  
 26341 ATCCTTACTGCGCTTCGATTGTGTGCGTACTGCTGCAATATTGTTAACGTGAGTCTTGTA  
 26341 26350 26360 26370 26380 26390  
 26341 TAGGAATGACGCGAAGCTAACACACGCATGACGACGTTATAACAATTGCACTCAGAACAT  
 >>>65\_F>>> 26443 to 26466  
 26401 AAACCTTCTTTTTACGTTTACTCTCGTGTTAAAAATCTGAATTCCTTAGAGTTCCTGAT  
 26401 26410 26420 26430 26440 26450  
 26401 TTTGGAAGAAAAATGCAAATGAGAGCACAAATTTTTAGACTTAAGAAGATCTCAAGGACTA  
 26461 CTTCTGGTCTAAACGAATAAATATTATAGTTTTTCTGTTTGAACTTTAATTTTAG  
 26461 26470 26480 26490 26500 26510  
 26461 GAAGACCAGATTTGCTTGATTATAATATAATCAAAAAGACAAACCTTGAAATTTAAATC  
 <<<66\_R<<< 26570 to 26591  
 26521 CCATGGCAGATTCCAACGGTACTATTACCGTTGAAGAGCTTAAAAAGCTCCTTGAACAAT  
 26521 26530 26540 26550 26560 26570  
 26521 GGTACCGTCTAAGGTTGCCATGATAATGGCAACTTCTCGAATTTTTCGAGGAACCTTGTTA  
 26581 GGAACCTAGTAATAGGTTTCCTATTCCCTTACATGGATTTGTCTTCTACAATTTGCCTATG  
 26581 26590 26600 26610 26620 26630  
 26581 CCTTGATCATTATCCAAAGGATAAGGAATGTACCTAAACAGAAGATGTTAAACGGATAC  
 26641 CCAACAGGAATAGGTTTTTGTATATAATTAAGTTAATTTTCTGCTGTTATGGCCAG  
 26641 26650 26660 26670 26680 26690  
 26641 GGTTGTCCTTATCCAAAACATATATTAATTCAATTAAAAGGAGACCGACAATACCGGTC



26701 TAACTTTAGCTTGTGCTTGTGCTGCTGCTTACAGAATAAATTGGATCACCGGTGGAA  
 26701 26710 26720 26730 26740 26750  
 26701 ATTGAAATCGAACAAAACACGAACGACGACAAATGTCTTATTTAACCTAGTGGCCACCTT  
 26761 TTGCTATCGCAATGGCTTGTCTTGTAGGCTTGATGTGGCTCAGCTACTTCATTGCTTCTT  
 26761 26770 26780 26790 26800 26810  
 26761 AACGATAGCGTTACCGAACAGAACATCCGAACTACACCGAGTCGATGAAGTAACGAAGAA  
 26821 TCAGACTGTTTGC GCGTACGCGTTCATGTGGTCATTCAATCCAGAACTAACATTCTTC  
 26821 26830 26840 26850 26860 26870  
 26821 AGTCTGACAAACGCGCATGCGCAAGGTACACCAGTAAGTTAGGTCTTTGATTGTAAGAAG  
 26881 TCAACGTGCCACTCCATGGCACTATTCTGACCAGACCGCTTCTAGAAAGTGAACCTCGTAA  
 26881 26890 26900 26910 26920 26930  
 26881 AGTTGCACGGTGAGGTACCGTGATAAGACTGGTCTGGCGAAGATCTTTCATTGAGCATT  
 26941 TCGGAGCTGTGATCCTTCGTGGACATCTTCGTATTGCTGGACACCATCTAGGACGCTGTG  
 26941 26950 26960 26970 26980 26990  
 26941 AGCCTCGACACTAGGAAGCACCTGTAGAAGCATAACGACCTGTGGTAGATCCTGCGACAC  
 27001 ACATCAAGGACCTGCCATAAGAAATCACTGTTGCTACATCACGAACGCTTTCTTATTACA  
 27001 27010 27020 27030 27040 27050  
 27001 TGTAGTTCCTGGACGGATTTCTTTAGTGACAACGATGTAGTGCTTGCGAAAGAATAATGT  
 27061 AATTGGGAGCTTCGCAGCGTGTAGCAGGTGACTCAGGTTTTGCTGCATACAGTCGCTACA  
 27061 27070 27080 27090 27100 27110  
 27061 TTAACCTCGAAGCGTCGCACATCGTCCACTGAGTCCAAAACGACGTATGTCAGCGATGT  
 27121 GGATTGGCAACTATAAATTAAACACAGACCATTCCAGTAGCAGTGACAATATTGCTTTGC  
 27121 27130 27140 27150 27160 27170  
 27121 CCTAACCGTTGATATTTAATTTGTGCTGGTAAGGTCATCGTCACTGTTATAACGAAACG  
 >>>67\_F>>> 27204 to 27226  
 27181 TTGTACAGTAAGTGACAACAGATGTTTCATCTCGTTGACTTTCAGGTTACTATAGCAGAG  
 27181 27190 27200 27210 27220 27230  
 27181 AACATGTCATTCACTGTTGTCTACAAAGTAGAGCAACTGAAAGTCCAATGATATCGTCTC  
 27241 ATATTACTAATTATTATGAGGACTTTTAAAGTTTCCATTTGGAATCTTGATTACATCATA  
 27241 27250 27260 27270 27280 27290  
 27241 TATAATGATTAATAATACTCCTGAAAATTTCAAAGGTAAACCTTAGAACTAATGTAGTAT  
 27301 AACCTCATAATTAAAAATTTATCTAAGTCACTAACTGAGAATAAATATTCTCAATTAGAT  
 27301 27310 27320 27330 27340 27350  
 27301 TTGGAGTATTAATTTTTTAAATAGATTCACTGATTGACTCTTATTTATAAGAGTTAATCTA

<<<68\_R<<< 27415 to

27436

27361 GAAGAGCAACCAATGGAGATTGATTAAACGAACATGAAAATTATTCTTTTCTTGGCACTG  
 27361 27370 27380 27390 27400 27410  
 27361 CTTCTCGTTGGTTACCTCTAACTAATTTGCTTGTACTTTTAATAAGAAAAGAACCGTGAC  
 27421 ATAACACTCGCTACTTGTGAGCTTTATCACTACCAAGAGTGTGTTAGAGGTACAACAGTA  
 27421 27430 27440 27450 27460 27470  
 27421 TATTGTGAGCGATGAACACTCGAAATAGTGATGGTTCTCACACAATCTCCATGTTGTCAT  
 27481 CTTTTAAAAGAACCTTGTCTTCTGGAACATACGAGGGCAATTCACCATTTTCATCCTCTA  
 27481 27490 27500 27510 27520 27530  
 27481 GAAAATTTTCTTGGAACGAGAAGACCTTGATGCTCCCGTTAAGTGGTAAAGTAGGAGAT  
 27541 GCTGATAACAAATTTGCACTGACTTGTCTTAGCACTCAATTTGCTTTTGCTTGTCTGCTGAC  
 27541 27550 27560 27570 27580 27590  
 27541 CGACTATTGTTTAAACGTGACTGAACGAAATCGTGAGTTAAACGAAAACGAACAGGACTG  
 27601 GCGGTAAAACACGTCTATCAGTTACGTGCCAGATCAGTTTCACCTAACTGTTTCATCAGA  
 27601 27610 27620 27630 27640 27650  
 27601 CCGCATTTTGTGCAGATAGTCAATGCACGGTCTAGTCAAAGTGGAATTTGACAAGTAGTCT  
 27661 CAAGAGGAAGTTCAAGAACTTTACTCTCCAATTTTTCTTATTGTTGCGGCAATAGTGTTT  
 27661 27670 27680 27690 27700 27710  
 27661 GTTCTCCTTCAAGTTCTTGAAATGAGAGGTTAAAAAGAATAACAACGCCGTTATCACAAA  
 27721 ATAACACTTTGCTTCACACTCAAAGAAAAGACAGAATGATTGAACTTTCATTAATTGACT  
 27721 27730 27740 27750 27760 27770  
 27721 TATTGTGAAACGAAGTGTGAGTTTTCTTCTGTCTTACTAACTTGAAAGTAATTAAGTGA  
 27781 TCTATTTGTGCTTTTTAGCCTTTCTGTATTCCTTGTTTTAATTATGCTTATTATCTTTT  
 27781 27790 27800 27810 27820 27830

27781 AGATAAACACGAAAAATCGGAAAGACGATAAGGAACAAAATTAATACGAATAATAGAAAA  
 27841 GGTTCCTCACTTGAACGCAAGATCATAATGAACTTGTCACGCCTAAACGAACATGAAAT  
 27841 27850 27860 27870 27880 27890  
 27841 CCAAGAGTGAACCTTGACGTTCTAGTATTACTTTGAACAGTGCGGATTTGCTTGTACTTTA  
 27901 TTCTTGTTTTCTTAGGAATCATCACAACCTGTAGCTGCATTTACCAAGAATGTAGTTTAC  
 27901 27910 27920 27930 27940 27950  
 27901 AAGAACAAAAGAATCCTTAGTAGTGTTGACATCGACGTAAAGTGGTTCCTTACATCAAATG  
 27961 AGTCATGTACTCAACATCAACCATATGTAGTTGATGACCCGTGTCCTATTCACTTCTATT  
 27961 27970 27980 27990 28000 28010  
 27961 TCAGTACATGAGTTGTAGTTGGTATACATCAACTACTGGGCACAGGATAAGTGAAGATAA

>>>69\_F>>> 28072 to

28093

28021 CTAAATGGTATATTAGAGTAGGAGCTAGAAAAATCAGCACCTTTAATTGAATTGTGCGTGG  
 28021 28030 28040 28050 28060 28070  
 28021 GATTTACCATATAATCTCATCCTCGATCTTTTAGTCGTGGAAATTAACCTTAACACGCACC  
 28081 ATGAGGCTGGTTCTAAATCACCCATTCACTACATCGATATCGGTAATTATACAGTTTCCT  
 28081 28090 28100 28110 28120 28130  
 28081 TACTCCGACCAAGATTTAGTGGGTAAAGTCATGTAGCTATAGCCATTAATATGTCAAAGGA  
 28141 GTTTACCTTTTACAATTAATTGCCAGGAACCTAAATTGGGTAGTCTTGTAGTGCGTTGTT  
 28141 28150 28160 28170 28180 28190  
 28141 CAAATGGAAAATGTTAATTAACGGTCCCTTGATTTAACCCATCAGAACATCACGCAACAA

<<<70\_R<<< 28221 to 28242

28201 CGTTCCTATGAAGACTTTTTAGAGTATCATGACGTTTCGTGTTGTTTTAGATTTTCATCTAAA  
 28201 28210 28220 28230 28240 28250  
 28201 GCAAGATACTTCTGAAAAATCTCATAGTACTGCAAGCACAACAAAATCTAAAGTAGATTT  
 28261 CGAACAAACTAAAATGTCTGATAATGGACCCCAAAATCAGCGAAATGCACCCCGCATTAC  
 28261 28270 28280 28290 28300 28310  
 28261 GCTTGTTTTGATTTTACAGACTATTACCTGGGGTTTTAGTCGCTTTACGTGGGGCGTAATG  
 28321 GTTTGGTGGACCCTCAGATTCAACTGGCAGTAACCAGAATGGAGAACGCAGTGGGGCGCG  
 28321 28330 28340 28350 28360 28370  
 28321 CAAACCACCTGGGAGTCTAAGTTGACCGTCATTGGTCTTACCTCTTGCGTCACCCCGCGC  
 28381 ATCAAAACAACGTCGGCCCAAGGTTTACCCAATAATACTGCGTCTTGGTTCACCGCTCT  
 28381 28390 28400 28410 28420 28430  
 28381 TAGTTTTGTTGCAGCCGGGGTTCCAAATGGGTTATTATGACGCAGAACCAAGTGGCGAGA  
 28441 CACTCAACATGGCAAGGAAGACCTTAAATTCCTTCGAGGACAAGGCGTTCCAATTAACAC  
 28441 28450 28460 28470 28480 28490  
 28441 GTGAGTTGTACCGTTCCTTCTGGAATTTAAGGGAGCTCCTGTTCCGCAAGGTTAATTGTG  
 28501 CAATAGCAGTCCAGATGACCAAATTGGCTACTACCGAAGAGCTACCAGACGAATTCGTGG  
 28501 28510 28520 28530 28540 28550  
 28501 GTTATCGTCAGGTCTACTGGTTTAAACCGATGATGGCTTCTCGATGGTCTGCTTAAGCACC  
 28561 TGGTGACGGTAAAATGAAAGATCTCAGTCCAAGATGGTATTTCTACTACCTAGGAAGTGG  
 28561 28570 28580 28590 28600 28610  
 28561 ACCACTGCCATTTTACTTTCTAGAGTCAGGTTCTACCATAAAGATGATGGATCCTTGACC  
 28621 GCCAGAAGCTGGACTTCCCTATGGTGCTAACAAAGACGGCATCATATGGGTTGCAACTGA  
 28621 28630 28640 28650 28660 28670  
 28621 CGGTCTTCGACCTGAAGGGATACCACGATTGTTTCTGCCGTAGTATACCCAACGTTGACT  
 28681 GGGAGCCTTGAATACACCAAAAGATCACATTGGCACCCGCAATCCTGCTAACAATGCTGC  
 28681 28690 28700 28710 28720 28730  
 28681 CCCTCGGAACCTTATGTGGTTTTCTAGTGTAACCGTGGGCGTTAGGACGATTGTTACGACG  
 28741 AATCGTGCTACAACCTCCTCAAGGAACAACATTGCCAAAAGGCTTCTACGCAGAAGGGAG  
 28741 28750 28760 28770 28780 28790  
 28741 TTAGCACGATGTTGAAGGAGTTCCTTGTGTAACGGTTTTCCGAAGATGCGTCTTCCCTC

>>>71\_F>>> 28855 to

28876

28801 CAGAGGCGGCAGTCAAGCCTCTTCTCGTTCCTCATCACGTAGTCGCAACAGTTCAAGAAA  
 28801 28810 28820 28830 28840 28850  
 28801 GTCTCCGCCGTCAAGTTCGGAGAAGAGCAAGGAGTAGTGCATCAGCGTTGTCAAGTTCTTT  
 28861 TTCAACTCCAGGCAGCAGTAGGGGAACCTTCTCCTGCTAGAAATGGCTGGCAATGGCGGTGA  
 28861 28870 28880 28890 28900 28910

```

28861 AAGTTGAGGTCCGTCGTCATCCCCTTGAAGAGGACGATCTTACCGACCGTTACCGCCACT
28921 TGCTGCTCTTGCTTTGCTGCTGCTGACAGATTGAACCAGCTTGAGAGCAAAATGTCTGG
28921      28930      28940      28950      28960      28970
28921 ACGACGAGAACGAAACGACGACGAACTGTCTAACTTGGTCGAACTCTCGTTTTACAGACC
      <<<72_R<<< 29009 to 29030
28981 TAAAGGCCAACAAACAAGGCCAACTGTCACTAAGAAATCTGCTGCTGAGGCTTCTAA
28981      28990      29000      29010      29020      29030
28981 ATTTCCGGTTGTTGTTGTTCCGGTTTGACAGTGATTCTTTAGACGACGACTCCGAAGATT
29041 GAAGCCTCGGCAAAAACGTACTGCCACTAAAGCATACAATGTAACACAAGCTTTTCGGCAG
29041      29050      29060      29070      29080      29090
29041 CTTTCGGAGCCGTTTTTGCATGACGGTGATTTTCGTATGTTACATTGTGTTCGAAAGCCGTC
29101 ACGTGGTCCAGAACAAACCAAGGAAATTTGGGGACCAGGAATAATCAGACAAGGAAC
29101      29110      29120      29130      29140      29150
29101 TGCACCAGGCTTTGTTTGGGTTCCCTTTAAACCCCTGGTCCTTGATTAGTCTGTTCCCTTG
29161 TGATTACAAACATTGGCCGCAAATTGCACAATTTGCCCCAGCGCTTCAGCGTTCTTCGG
29161      29170      29180      29190      29200      29210
29161 ACTAATGTTTGTAAACGGCGTTTAACGTGTTAAACGGGGGTCGCGAAGTCGCAAGAAGCC
      >>>73_F>>> 29269 to 29290
29221 AATGTCGCGCATTGGCATGGAAGTCACACCTTCGGGAACGTGGTTGACCTACACAGGTGC
29221      29230      29240      29250      29260      29270
29221 TTACAGCGCGTAACCGTACCTTCAGTGTGGAAGCCCTTGACCAACTGGATGTGTCCACG
29281 CATCAAATTGGATGACAAAGATCCAAATTTCAAAGATCAAGTCATTTTGCTGAATAAGCA
29281      29290      29300      29310      29320      29330
29281 GTAGTTTAACTACTGTTTCTAGGTTTAAAGTTTCTAGTTCAGTAAAACGACTTATTCGT
29341 TATTGACGCATACAAAACATTCCCAACAGAGCCTAAAAAGGACAAAAAGAAGAAGGC
29341      29350      29360      29370      29380      29390
29341 ATAAGTGCATGTTTTGTAAGGGTGGTTGTCTCGGATTTTTCTGTTTTTCTTCTTCCG
29401 TGATGAAACTCAAGCCTTACCGCAGAGACAGAAGAAACAGCAAACTGTGACTCTTCTTCC
29401      29410      29420      29430      29440      29450
29401 ACTACTTTGAGTTCGGAATGGCGTCTCTGTCTTCTTGTGCTTTGACACTGAGAAGAAGG
29461 TGCTGCAGATTTGGATGATTTCTCCAAACAATTGCAACAATCCATGAGCAGTGCTGACTC
29461      29470      29480      29490      29500      29510
29461 ACGACGTCTAAACCTACTAAAGAGGTTTGTAAACGTTGTTAGGTACTCGTCACGACTGAG
29521 AACTCAGGCCTAAACTCATGCAGACCACACAAGGCAGATGGGCTATATAAACGTTTTTCGC
29521      29530      29540      29550      29560      29570
29521 TTGAGTCCGGATTTGAGTACGTCTGGTGTGTTCCGTCTACCCGATATATTTGCAAAAGCG
29581 TTTTCCGTTTACGATATATAGTCTACTCTTGTGCAGAATGAATTCTCGTAACTACATAGC
29581      29590      29600      29610      29620      29630
29581 AAAAGGCAAATGCTATATATCAGATGAGAACACGTCTTACTTAAGAGCATTGATGTATCG
29641 ACAAGTAGATGTAGTTAACTTTAATCTCACATAGCAATCTTTAATCAGTGTGTAACATTA
29641      29650      29660      29670      29680      29690
29641 TGTTTCATCTACATCAATTGAAATTAGAGTGTATCGTTAGAAATTAGTCACACATTGTAAT
29701 GGGAGGACTTGAAAGAGCCACCACATTTTCACCGAGGCCACGCGGAGTACGATCGAGTGT
29701      29710      29720      29730      29740      29750
29701 CCTCTCTGAACCTTCTCGGTGGTGTAAAAGTGGCTCCGGTGCGCCTCATGCTAGCTCACA
      <<<74_R<<< 29794 to 29814
29761 ACAGTGAACAATGCTAGGGAGAGCTGCCTATATGGAAGAGCCCTAATGTGTAAAATTAAT
29761      29770      29780      29790      29800      29810
29761 TGTCACCTTGTTACGATCCCTCTCGACGGATATACCTTCTCGGGATTACACATTTTAATTA
29821 TTTAGTAGTGCTATCCCATGTGATTTTAATAGCTTCTTAGGAGAATGACAAAAA
29821      29830      29840      29850      29860      29870
29821 AAATCATCACGATAGGGGTACACTAAAATTATCGAAGAATCCTCTTACTGTTTTTTTTTTT
29881 AAAAAAAAAAAAAAAAAAAAAA
29881      29890      29900
29881 TTTTTTTTTTTTTTTTTTTTTT

```

```

Primer:      Sequence:
1_F      5'-ACCAACTTTTCGATCTCTTGTAG-3'
2_R      5'-ACTTCTACTAAGCCACAAGTGC-3'

```

3\_F 5'-TTCATGCACTTTGTCCGAAC-3'  
4\_R 5'-CGTGTACCAAGCAATTTTCATG-3'  
5\_F 5'-TTTGTGGAAACTGTGAAAGG-3'  
6\_R 5'-CAAATGCATAAAGAGGACTCAG-3'  
7\_F 5'-TACAACCATTAGAACAACCTACT-3'  
8\_R 5'-TTGAGTGTGAAGGTATTGTTTG-3'  
9\_F 5'-TGTTAATGCAGCCAATGTTTAC-3'  
10\_R 5'-AAGTGGTCCATTAGTAGCTATG-3'  
11\_F 5'-AAATGGTTACACTGTAGAGGAG-3'  
12\_R 5'-ATTAATTTGCGTGTTTCTTCTGC-3'  
13\_F 5'-TTACCTAATGATGACACTCTACG-3'  
14\_R 5'-CCATTAACCTGTGGGTATTTCC-3'  
15\_F 5'-AATTGGATGGTGTGTTTGTAC-3'  
16\_R 5'-CTCTTGAAGCAGGTTTCTTATAAC-3'  
17\_F 5'-ACCGTGTTTGTACTAATTATATGCC-3'  
18\_R 5'-ACCGACACTCTTAACAGTATTC-3'  
19\_F 5'-GAGCAACAAGAGTCGAATGTAC-3'  
20\_R 5'-AGTCTCTCGCAACTTCATCAC-3'  
21\_F 5'-TGGAACGTTAAAGATTTTCATGTC-3'  
22\_R 5'-CTTGTCTAGTAGTTGCACATGTC-3'  
23\_F 5'-GATTCTGAGTACTGTAGGCACG-3'  
24\_R 5'-ATTTACAGCATCTACACCACAG-3'  
25\_F 5'-CCACAAACCTCTATCACCTCAG-3'  
26\_R 5'-CATCAAGCCAAAGACCGTTAAG-3'  
27\_F 5'-TTTCTGCTCAAACCTGGAATTGC-3'  
28\_R 5'-GGAAAGTAACACCTGAGCATTG-3'  
29\_F 5'-TCAACCGCTACTTTAGACTGAC-3'  
30\_R 5'-TGTTGAGTTTGAAGGCATCTATG-3'  
31\_F 5'-AATACCTCTTACAACAGCAGCC-3'  
32\_R 5'-TAATTTGACAGCAGAATTGGCC-3'  
33\_F 5'-AACTTGTGCTAATGACCCTGTG-3'  
34\_R 5'-TAAGACGGGCTGCACTTACAC-3'  
35\_F 5'-TTGACACTGACTTAACAAAGCC-3'  
36\_R 5'-ATTTGGGTGGTATGTCTGATCC-3'  
37\_F 5'-ACGTAATGTATCCCTACTATAACTC-3'  
38\_R 5'-TTTGCTTGTTCCAATTACTACAG-3'  
39\_F 5'-GTGTACCTTCCTTACCCAGATC-3'  
40\_R 5'-TGAAAGACATCAGCATACTCCTG-3'  
41\_F 5'-CTATGGTGATGCTGTTGTTTACC-3'  
42\_R 5'-TCTAACATAGTGCTCTTGTGGC-3'  
43\_F 5'-AATTCCTTACACGTAACCCTGC-3'  
44\_R 5'-ATTCTGAGCCCTGTGATGAATC-3'  
45\_F 5'-CCTTGGAATGTAGTGCGTATAAAG-3'  
46\_R 5'-TATCACATAGACAACAGGTGCG-3'  
47\_F 5'-CTTAACCTGCCTGGTTGTGATG-3'  
48\_R 5'-ACAGACAGCACCACCTAAATTG-3'  
49\_F 5'-CTGTAGGTCCCAAACAAGCTAG-3'  
50\_R 5'-CAATTTCCATTTGACTCCTGGG-3'  
51\_F 5'-TTAGCTGTACCCTATAATATGAGAG-3'  
52\_R 5'-TACAGTTGCACAATCACCAATC-3'  
53\_F 5'-TACAACCAGAACTCAATTACCC-3'  
54\_R 5'-AGCATGGAACCAAGTAACATTG-3'  
55\_F 5'-ACCCTCTCTCAGAAACAAAGTG-3'  
56\_R 5'-AGATGCAAATCTGGTGGCG-3'  
57\_F 5'-CCACAGACACTTGAGATTCTTG-3'  
58\_R 5'-CCTGTAGAATAAACACGCCAAG-3'  
59\_F 5'-GATTGCCTTGGTGATATTGCTG-3'  
60\_R 5'-ATGGTATTTGTAATGCAGCACC-3'  
61\_F 5'-ACCACAAATCATTTACTACAGACAAC-3'

62\_R 5'-TGCCAGAGATGTCACCTAAATC-3'  
63\_F 5'-ACTTGCTGTTGTTGTTTGTAAC-3'  
64\_R 5'-GTCGTAACAATTAGTATGCCAGC-3'  
65\_F 5'-TCTTCTAGAGTTCCTGATCTTCTG-3'  
66\_R 5'-TACTAGGTCCATTGTTCAAGG-3'  
67\_F 5'-GTTTCATCTCGTTGACTTTCAGG-3'  
68\_R 5'-AAGTAGCGAGTGTTATCAGTGC-3'  
69\_F 5'-TGTGCSTGGATGAGGCTGGTTC-3'  
70\_R 5'-CAACACGAACGTCATGATACTC-3'  
71\_F 5'-AAGAAATTCAACTCCAGGCAGC-3'  
72\_R 5'-CAGCAGCAGATTTCTTAGTGAC-3'  
73\_F 5'-CTACACAGGTGCCATCAAATTG-3'  
74\_R 5'-TTTACACATTAGGGCTCTTCC-3'
